1 **Multi-omics analysis reveals drivers of loss of  $\beta$ -cell function after**  
2 **newly diagnosed autoimmune type 1 diabetes:**  
3 **An INNODIA<sup>‡</sup> multicenter study**

4 Jose Juan Almagro Armenteros, PhD<sup>1†</sup>, Caroline Brorsson, PhD<sup>1†</sup>, Christian Holm Johansen,  
5 MSc<sup>1†</sup>, Karina Banasik, PhD<sup>1</sup>, Gianluca Mazzoni, PhD<sup>1</sup>, Robert Moulder, PhD<sup>2,3</sup>, Karoliina  
6 Hirvonen, MSc<sup>2,3</sup>, Tomi Suomi, PhD<sup>2,3</sup>, Omid Rasool, PhD<sup>2,3</sup>, Sylvaine FA Bruggraber,  
7 PhD<sup>4</sup>, M Loredana Marcovecchio, MD<sup>4</sup>, Emile Hendricks, MD<sup>4</sup>, Naba Al-Sari, PhD<sup>5</sup>, Ismo  
8 Mattila, MSc<sup>5</sup>, Cristina Legido-Quigley, PhD<sup>5</sup>, Tommi Suvitaival<sup>5</sup>, PhD, Piotr J Chmura,  
9 PhD<sup>1</sup>, Mikael Knip, MD<sup>6,7</sup>, Anke M Schulte, MD<sup>8</sup>, Jeong Heon Lee, PhD<sup>9</sup>, Guido Sebastiani,  
10 PhD<sup>10,11</sup>, Giuseppina Emanuela Grieco, PhD<sup>10,11</sup>, Laura L Elo, PhD<sup>2,3,12</sup>, Simranjeet Kaur,  
11 PhD<sup>13</sup>, Flemming Pociot, MD<sup>13</sup>, Francesco Dotta, MD<sup>10,14</sup>, Tim Tree, PhD<sup>15</sup>, Riitta  
12 Lahesmaa, MD<sup>2,3</sup>, Lut Overbergh, PhD<sup>16</sup>, Chantal Mathieu, MD<sup>16</sup>, Mark Peakman, MD<sup>9,15</sup>,  
13 Søren Brunak, PhD<sup>1\*</sup> on behalf of the INNODIA<sup>‡</sup> investigators

14  
15 <sup>1</sup>Novo Nordisk Foundation Center for Protein Research, Faculty of Health and Medical  
16 Sciences, University of Copenhagen, Copenhagen, Denmark

17 <sup>2</sup>Turku Bioscience Centre, University of Turku and Åbo Akademi University, Turku, Finland

18 <sup>3</sup>InFLAMES Research Flagship Center, University of Turku, Turku Finland

19 <sup>4</sup>Department of Paediatrics, University of Cambridge, Cambridge, England

20 <sup>5</sup>Steno Diabetes Center Copenhagen, Systems Medicine, Herlev, Denmark

21 <sup>6</sup>Research Program for Clinical and Molecular Metabolism, Faculty of Medicine, University  
22 of Helsinki, Helsinki, Finland

23 <sup>7</sup>Pediatric Research Center, New Children's Hospital, Helsinki University Hospital

24 <sup>8</sup>Bayer Pharmaceuticals, Berlin, Germany

25 <sup>9</sup>Immunology & Inflammation Research Therapeutic Area, Sanofi, MA, USA

26 <sup>10</sup>Department of Medicine, Surgery and Neuroscience, Università degli Studi di Siena, Siena,  
27 Italy

28 <sup>11</sup> Fondazione Umberto di Mario, ONLUS – Toscana Life Sciences, Siena, Italy

29 <sup>12</sup>Institute of Biomedicine, University of Turku, Turku, Finland

30 <sup>13</sup>Steno Diabetes Center Copenhagen, Herlev University Hospital, Region Hovedstaden,  
31 Denmark

32 <sup>14</sup>Tuscany Centre for Precision Medicine (CReMeP), Siena, Italy

33 <sup>15</sup>Department of Immunobiology, King's College, London, UK

34 <sup>16</sup>Department of Chronic Diseases and Metabolism, Endocrinology, Katholieke Universiteit

35 <sup>16</sup>Leuven, Leuven, Belgium

NOTE: This preprint reports new research that has not been certified by peer review and should not be used to guide clinical practice.

36

37 † Shared first author

38 \* Corresponding author:

39 Søren Brunak, Novo Nordisk Foundation Center for Protein Research, Faculty of Health and  
40 Medical Sciences, University of Copenhagen, Blegdamsvej 3A, DK-2200 Copenhagen,  
41 Denmark. Tel: +45-35325000, Email: [soren.brunak@cpr.ku.dk](mailto:soren.brunak@cpr.ku.dk).

42 ‡INNODIA: “Innovative approaches to understanding and arresting type 1 diabetes”- List  
43 of contributors included with submission.

44

45 **Abstract**

46 **Background**

47 Heterogeneity in the rate of  $\beta$ -cell loss in newly diagnosed type 1 diabetes patients is poorly  
48 understood and creates a barrier to designing and interpreting disease-modifying clinical  
49 trials. Integrative analyses of complementary multi-omics data obtained after the diagnosis of  
50 T1D may provide mechanistic insight into the diverse rates of disease progression.

51 **Methods**

52 We collected samples in a pan-European consortium that enabled the concerted analysis of  
53 five different omics modalities in data from 97 newly diagnosed patients. In this study we  
54 used Multi-Omics Factor Analysis to identify molecular signatures correlating with post-  
55 diagnosis decline in  $\beta$ -cell mass measured as fasting C-peptide.

56 **Results**

57 Two molecular signatures were significantly correlated with fasting C-peptide levels. One  
58 signature showed a correlation to neutrophil degranulation, cytokine signaling, lymphoid and  
59 non-lymphoid cell interactions and G-protein coupled receptor signaling events that were  
60 inversely associated with rapid decline in  $\beta$ -cell function. The second signature was related to  
61 translation and viral infection were inversely associated with change in  $\beta$ -cell function. In  
62 addition, the immunomics data revealed a Natural Killer cell signature associated with rapid  
63  $\beta$ -cell decline.

64 **Conclusion**

65 Features that differ between individuals with slow and rapid decline in  $\beta$ -cell mass could be  
66 valuable in staging and prediction of the rate of disease progression and thus enable smarter  
67 (shorter and smaller) trial designs for disease modifying therapies, as well as offering  
68 biomarkers of therapeutic effect.

69

70 **Funding**

71 This work is funded by the Innovative Medicine Initiative 2 Joint Undertaking (IMI2 JU)  
72 under grant agreement N° 115797 (INNODIA) and N° 945268 (INNODIA HARVEST). This  
73 Joint Undertaking receives support from the Union's Horizon 2020 research and innovation  
74 program and 'EFPIA', 'JDRF' and 'The Leona M. and Harry B. Helmsley Charitable Trust'.  
75

## 76 **Introduction**

77 Type 1 diabetes is an autoimmune disease involving environmental and genetic factors that  
78 trigger immune-mediated pancreatic  $\beta$ -cell dysfunction and destruction that results in insulin  
79 loss and symptomatic hyperglycemia requiring lifelong insulin therapy<sup>1</sup>. Globally, around 1.2  
80 million people below the age of 20 years have type 1 diabetes, with an annually increasing  
81 incidence of 3% influenced strongly by geography<sup>2</sup>. Insulin replacement therapy is unable to  
82 fully mimic physiological control of blood glucose and therefore, many people living with type  
83 1 diabetes develop severe disease complications that are directly attributable to prolonged  
84 glycemic exposure<sup>3</sup>, with markedly reduced life expectancy<sup>4</sup>. In the face of the disease burden  
85 and unmet need, international consortia are mobilizing to develop disease-modifying therapies.  
86 For example, therapies that maintain even minimal residual C-peptide secretion capacity have  
87 been found to have demonstrable clinical benefit<sup>5</sup>. An emerging barrier to this effort is disease  
88 heterogeneity. In particular, the rate of decline of  $\beta$ -cell capacity is highly variable, for reasons  
89 that remain unclear. As a result, clinical trial designs for disease-modifying therapies are  
90 necessarily cumbersome, requiring large sample sizes and prolonged observation. In addition,  
91 opportunities for tailored disease-modifying therapies are limited by an unclear understanding  
92 of the factors that drive diabetes progression after diagnosis. Gaining this knowledge could  
93 provide the attainment for improved participant inclusion in focused designed trials to foster  
94 their success and participant benefit<sup>6</sup>.

95  
96 Studies with this goal conducted to date have typically been constrained by limitations to cohort  
97 size and the number of different data dimensions available for analysis<sup>7,8</sup>. Thus, it has not been  
98 possible to conduct studies with an emphasis on hypothesis-generating, unbiased approaches,  
99 and integration of data across pathophysiological systems. These require large-scale, inter-  
100 disciplinary research efforts, in which carefully curated longitudinal clinical cohorts are aligned  
101 with multi-parametric technology platforms. Such a systems-based approach can address key  
102 questions with less bias and generate novel hypotheses on disease drivers. We used this strategy  
103 in the setting of a pan-European research consortium in which people with newly diagnosed  
104 type 1 diabetes as well as people at risk of developing type 1 diabetes (antibody positive) were  
105 enrolled into a master protocol<sup>9</sup> to conduct a prospective study in search of factors that correlate  
106 with the rate of decline in  $\beta$ -cell mass/function. This endeavor was supported by the Innovative  
107 Medicines Initiative-2 Joint Undertaking, where INNODIA was created, being a private-public  
108 partnership of 40 partners in 16 countries. In the natural history study, people with newly  
109 diagnosed type 1 diabetes and unaffected family members are in follow up, allowing deep

110 clinical characterization, as well as multi-omics analysis of samples (blood, urine, stool)  
111 collected and analyzed using standardized operating procedures ([www.innodia.eu](http://www.innodia.eu)). Here we  
112 report the multi-omics analysis of the ‘first 100’ people with newly diagnosed disease. We  
113 report the existence of latent factors integrated from transcriptomic, small RNA, genomic,  
114 targeted proteomic, lipidomic, metabolomic, and immunomic-level data that show a  
115 relationship to subsequent rates of disease progression and have potential value as stratification  
116 and therapeutic target identification tools.

## 117 **Results**

### 118 **C-peptide decline over time**

119 The individual rates of decline in C-peptide levels over time were calculated, defined as the  
120 slope of C-peptide change over 12 months as described in Methods (Supplementary Fig. 1).  
121 Two individuals only had one available C-peptide measurement and were not assigned a group  
122 as C-peptide decline could not be determined. An overall trend of C-peptide decline over time  
123 was observed for the entire cohort (p-value 0.0001) (Fig. 2A). By calculating the C-peptide  
124 slopes using a linear mixed-effect model, the participants were divided into terciles (equal-  
125 sized), classified as rapid, slow, and increasing progression groups, yielding three groups with  
126 distinct progression patterns (Fig. 2B). All three progression groups had a similar estimated  
127 baseline C-peptide value (p-value 0.296), but significant C-peptide slopes (p-value < 0.0001).  
128 The clinical features for each of the progression groups are shown in Table 1.

129  
130 We further analyzed the relationship between age and C-peptide change over time (Fig. 2C) as  
131 this was the only significant difference between the progression groups (Table 1). Participants  
132 less than ten years old had a significantly lower baseline C-peptide level compared to those  
133 older than ten years (p-value < 0.0001), whereas baseline values did not differ between the 10-  
134 18 years and >18 years age groups (p-value 0.85). However, the C-peptide change over time  
135 was not significantly different between the three age intervals (p-value 0.46). This indicated  
136 that age is associated with baseline C-peptide values but the decline in C-peptide over time is  
137 similar for all age groups. In addition, when investigating the distributions of C-peptide decline  
138 rates, children < 10 years old had a significantly different distribution of decline rates than  
139 those aged 10-18 years (p-value 0.0072). However, neither 10-18 year and >18 year groups nor  
140 the >18 year and < 10 year groups had different distributions (p-values 0.075 and 0.7,  
141 respectively) (Supplementary Fig. 2). These findings indicate a degree of association between  
142 the rate of decline and age among children, and as a result, age was included after log  
143 transformation as a covariate in our models to correct for potential effects on the relationship  
144 between C-peptide slopes and ‘omics.

145  
146 Evaluating the association of sex with the C-peptide change over time (Fig. 2D) we found no  
147 significant association with baseline C-peptide (p-value 0.64) or slope (p-value 0.16).

148  
149  
150

## 151 **Multi-omics integration analysis**

152 The multi-omics data set overview is shown in Fig. 3A. Missing values, seen predominantly in  
153 the immunomics data set, are disregarded by MOFA and do not affect the decomposition of  
154 the data into latent factors. After training MOFA on the multi-omics data set (Fig. 3B) the latent  
155 factors that capture most of the variance across participants were represented by the mRNA  
156 and miRNA data. MOFA captures latent factors with common variance across the different  
157 data sets, even though certain data types appear to be responsible of most of the captured  
158 variance (Factors 1 to 7). This indicates that certain degree of heterogeneity exists across data  
159 sets, making the integration more challenging.

160

161 Importantly, however, latent factors 15 and 18 were significantly associated (p-values < 0.1  
162 adjusted by Benjamini-Hochberg) with C-peptide slopes (Fig. 3D) but not with age or baseline  
163 C-peptide. The amount of variance captured by latent factors 15 and 18 is 2.62% and 1.84%,  
164 respectively, indicating that the decline of C-peptide over time is not among the major sources  
165 of variance across the participants, but is sufficiently strong to be captured by this method. The  
166 differences in the strength of associations for latent factors 15 and 18 with the progression  
167 groups and C-peptide slopes indicated that latent factor 15 captures a non-linear association  
168 with the progression groups (Fig. 3C), and for latent factor 18 a linear association with the rate  
169 of C-peptide decline (Fig. 3E). As the two factors correlate with C-peptide decline, they may  
170 contain molecular signatures useful for explaining the differences in disease progression  
171 between patients. Therefore, we continued a thorough scrutiny of these factors.

172

## 173 **Differential gene expression analysis**

174 Differentially expressed genes (DEGs) were identified between the different progression  
175 groups, with batch and age groups used as covariates (Fig. 4). P-values were adjusted for  
176 multiple testing using the Benjamini-Hochberg procedure and genes with an adjusted p-value  
177 < 0.1 were reported as differentially expressed genes (DEG). Fig. 4 shows the volcano plots of  
178 the different comparisons together with the genes belonging to latent factors 15 and 18. A total  
179 of 339 DEGs were observed comparing the rapid decline group and the increasing group (Fig.  
180 4A, Supplementary Table 7), 33 DEGs between the rapid and slow decline group (Fig. 4B,  
181 Supplementary Table 8), and 1,205 DEGs between the slow decline group and the increasing  
182 group (Fig. 4C, Supplementary Table 9). Additionally, differential gene expression was  
183 performed for the C-peptide slopes, hence studying the linear change in gene expression with

184 respect to the rate of decline of C-peptide over time. Here we found 484 DEGs (Fig. 4D,  
185 Supplementary Table 10).

186

187 More DEGs were observed when comparing the slow and increasing than between rapid and  
188 increasing progression groups, with little overlap between the significant top-ranking genes.  
189 Additionally, very few genes were differentially expressed between rapid and slow progression  
190 groups. Altogether, these results might indicate that even though the rapid and slow progression  
191 groups are more alike, the set of DEGs between these two groups and the increasing group are  
192 not the same. To further confirm this, two additional differential expression analyses were  
193 performed. One between the rapid-slow groups combined versus the increasing group and  
194 another between the slow-increasing groups combined versus the rapid. The analyses showed  
195 that the rapid-slow vs increasing comparison produced 1,804 DEGs (Supplementary Table 11),  
196 while the slow-increasing vs rapid comparison produced 18 DEGs (Supplementary Table 12).  
197 This indicates that the increasing progression group is much more dissimilar in its blood sample  
198 expression profile towards the other two groups at the early stage of type 1 diabetes  
199 manifestation. Therefore, the underlying biological processes involved in the developing  
200 disease progression do not vary much at this early time of the disease manifestation among  
201 people experiencing in the future different degrees of loss of  $\beta$ -cell function. At baseline they  
202 vary significantly more when comparing people experiencing in the future loss of  $\beta$ -cell  
203 function and those experiencing an improvement in  $\beta$ -cell function.

204

205 The similarity between DEGs found by the continuous change in C-peptide levels (n=484) and  
206 DEGs between the rapid and increasing group (n=339) showed an overlap of 209 genes. The  
207 rapid-slow vs increasing DEGs (n=1,804) had a bigger overlap with the continuous C-peptide  
208 levels where 313 of the same DEGs were found. In all cases, the DEGs had the same sign of  
209 their log<sub>2</sub> fold changes for both analyses. Therefore, most DEGs were observed for the  
210 continuous change were also found when investigating progression groups. Nonetheless, we  
211 believe that the linear association of blood gene expression at baseline with the C-peptide  
212 slopes is more informative regarding the disease progression. We observe that change in  $\beta$ -cell  
213 function follows a gradient, so by categorizing participants into groups, we lose the resolution  
214 that the C-peptide slopes are providing.

215

216

217



## 218 **Annotation of latent factors**

219 To examine the biological pathways in the two most relevant latent factors, we used gene set  
220 enrichment analysis. This analysis was divided into genes positively regulated in the rapid  
221 decline group and genes negatively regulated in the rapid decline group. Fig. 5 displays the top  
222 15 significant pathways in each of the two associated latent factors (p-values < 0.1 adjusted by  
223 Benjamini-Hochberg). Negatively regulated genes in latent factor 15 are enriched in the  
224 immune system and signaling by G protein-coupled receptors (GPCR) pathways. Of specific  
225 interest are pathways associated with innate immunity, such as neutrophil degranulation, with  
226 high expression of granule proteins (e.g. CTSS, MPO) pointing to the presence of activated or  
227 degranulated neutrophils; and platelet activation, signaling and aggregation (the latter not  
228 shown). Also, several pathways pointing to cytokine signaling and interleukin (e.g. IL-1 $\beta$ )  
229 signaling emerge. Regarding the role of GPCRs, several pathways are associated with latent  
230 factor 15, such as signaling by GPCRs, downstream signaling and GPCR ligand binding.  
231 Positively regulated genes in latent factor 15 are also enriched in immune system pathways,  
232 with again an important contribution of the innate immune system, although here it seems that  
233 the increase is mainly attributed to resting neutrophils, with for instance high expression of  
234 LY96. Collectively these data show that GSEA pathways in innate immunity are mainly  
235 associated with the activation status of the neutrophils, with shift in the balance of resting  
236 neutrophils versus activated or degranulated neutrophils.

237

238 Negatively regulated genes in latent factor 18 are enriched in influenza infection pathways and  
239 mRNA translation pathways, suggesting that viral mRNA replication and translation by host  
240 cell machinery are major pathological features of this association. Positively regulated genes  
241 in latent factor 18 did not show a particular pattern of enrichment.

242

243 Furthermore, the relation of the latent factors' genes to previous type 1 diabetes publications  
244 was studied. Using the Open Targets database<sup>10</sup>, a total of 174 genes out of the 668 top genes  
245 (three-fold higher than expected by chance) in the latent factor 15 have been previously  
246 associated with type 1 diabetes (p-value 0.03). On the other hand, the overlap between the top  
247 genes in the latent factor 18 and associated disease genes was not significant. These results  
248 indicate that latent factor 15 is capturing a set of genes composed of known disease targets (e.g.  
249 INSR, NDUFA4, CTSH) as well as potential new candidate genes already detectable in blood  
250 in the early phase of type 1 diabetes.

251

## 252 **Interpretation of biological networks**

253 Biological networks were constructed for latent factors 15 and 18 separately, based on protein-  
254 protein or protein-protein-miRNA interactions (Supplementary Fig. 3 and 4). As the two  
255 network types yielded similar results, we selected the protein-protein-miRNA networks for the  
256 focus of our interpretations. The latent factor 15 network revealed a diverse set of biological  
257 functions (Supplementary Fig. 5), some of them overlapping with the pathways shown in Fig.  
258 5. Immune system responses, signaling by different receptors and lipid metabolism are (widely)  
259 represented in these clusters. Notably there is an enrichment of lipid metabolism pathways as  
260 the lipidomic data also influenced latent factor 15. Some of the genes significantly associated  
261 with the C-peptide slopes also appear in several of the clusters, which further validates the  
262 biological processes captured by the latent factor. The latent factor 18 network was smaller and  
263 had more loosely defined clusters (Supplementary Fig. 6). Nonetheless, it captured a similar  
264 set of biological functions compared to the latent factor 15 network. Eukaryotic/viral mRNA  
265 translation is the main difference between the two networks, which appear as the biggest and  
266 more interconnected cluster of the latent factor 18 network. In this case, only one of the genes  
267 in this network was significantly associated with the C-peptide slopes.

268

## 269 **Immunomics signature**

270 Analysis of immune cell populations identified based on standard markers and their association  
271 with the C-peptide slopes revealed that Natural Killer (NK) cells were significantly associated  
272 after p-value adjustment, (Fig. 6A), with higher levels of NK cells observed in people with  
273 slow disease progression (Fig. 6B). Examination of the relationship between C-peptide slope  
274 and NK cell frequency in individual progression groups indicated the strongest correlation was  
275 observed among rapid progressors (Fig. 6C). Unsupervised analysis of the immunomics data  
276 revealed distinct clusters among the progression groups. Fig. 7A shows a FlowSOM color-  
277 density map of CD16 expression levels with node sizes representing the frequency of cells in  
278 each cluster. Meta-cluster 19 (MC-19) was assigned as the primary NK (CD56loCD16+) subset  
279 based on lineage marker expression and was significantly more abundant in the increasing  
280 versus rapid progression groups (8.8 vs 6.3% p-value=0.013). Examination of markers of NK  
281 cell activation and differentiation (KLRG1, TIGIT, CD38, and CD57) in the different  
282 progression groups showed higher expression of KLRG1, in the increasing group but lower  
283 levels of CD38.

284

285 Comparison of the genes associated with latent factor 15 and the leukocyte gene signature  
286 matrix LM22<sup>11</sup> revealed an overlap of 52 genes and enrichment in immune cell-specific genes  
287 (p-value 0.0001). The genes were representative of the following five main groups, T-cell  
288 specific, macrophage M1 specific, monocyte specific, neutrophil specific, and eosinophil  
289 specific (Supplementary Fig. 7). In this way, in addition to capturing immune-related pathways,  
290 the latent factor 15 broadly represented immune cell-specific genes.

291

### 292 **Other ‘omics associations with disease progression**

293 The association of factors derived from running MOFA without the transcriptomics data, did  
294 not yield any significant associations with the progression groups nor the C-peptide slopes. We  
295 can draw two conclusions based on these results. Firstly, the variance of the miRNA and  
296 lipidomics captured by latent factor 15 might indicate that these two omics data sets are only  
297 informative of the disease progression in combination with transcriptomics. Interestingly, an  
298 enrichment on lipid metabolism pathways was apparent among the genes associated with latent  
299 factor 15, indicating that these pathways might have an effect of disease progression. This  
300 shows how integration of both lipidomics and transcriptomics data aid in discovering  
301 enrichment in specific pathways. Similarly, the incorporation of transcriptomics and miRNA  
302 data allowed the discovery of enrichment in viral infection pathways.

303

304 Secondly, the main difference between transcriptomics and the other omics data was that it was  
305 determined from whole blood. The remaining omics are collected either from serum, plasma,  
306 or PBMCs. Even though some analytes may give similar results, samples obtained from the  
307 same medium are more easily comparable. Therefore, the disparity between omics that we  
308 observe in the latent factors and in the linear association of each omics data set might be caused  
309 by the source medium. This could be considered both a drawback and an advantage. On one  
310 hand, it is undesirable that this disparity exists because correlated analytes across omics cannot  
311 be studied. This makes the data integration challenging as we cannot observe the joint effect  
312 of multiple omics nor validate whether the analytes associated with the disease progression in  
313 one data type can also be observed in a different one. On the other hand, the heterogeneity  
314 across omics can be seen as complementary information. Each omics data set is capturing a  
315 different source of variation, thus, providing additional information not captured by the other  
316 omics types. Based on the current data, we cannot conclude whether the plasma and serum  
317 omics were not associated with the disease progression due to the medium or the analytes  
318 themselves.

319

## 320 Discussion

321 In this study, we identified two latent factors associated with  $\beta$ -cell decline. These factors were  
322 predominantly influenced by transcriptomics, with secondary contributions of miRNA and  
323 lipidomics, respectively. Latent factor 15 revealed an enrichment of immune system pathways,  
324 the most significant being associated with neutrophil degranulation, cytokine signaling, and  
325 immunoregulatory interactions between lymphoid and non-lymphoid cells. Moreover, there  
326 were multiple pathways associated with GPCR signaling events. More detailed GSEA revealed  
327 that disease progression (C-peptide slopes) was associated with an altered balance between  
328 resting and activated/degranulated neutrophils. This is in keeping with previous studies that  
329 showed a temporary decline in the number of circulating neutrophils in people with newly  
330 diagnosed type 1 diabetes, compared to healthy controls, as well as high circulating levels of  
331 neutrophil extracellular traps (NETs)<sup>12-14</sup>. The previous detection of neutrophils and NETs in  
332 the pancreas of deceased subjects affected by type 1 diabetes, and a correlation between  
333 circulating neutrophil numbers with C-peptide levels in pre-symptomatic subjects (non-  
334 diabetic, at-risk) has implicated that activated neutrophils play a pathogenic role in type 1  
335 diabetes<sup>15</sup>. Our data add significantly to this hypothesis since we show in longitudinal follow-  
336 up that the neutrophil profile at diagnosis associates with rate of disease progression.

337  
338 Of further interest, GSEA shows platelet activation to be a feature of latent factor 15, linking  
339 our findings to the recent demonstration of a role for activated platelets in the formation of  
340 platelet-neutrophil aggregates (PNAs), which are increased in the circulation of subjects during  
341 the development of type 1 diabetes<sup>16</sup>. It is tempting to speculate that activation of GPCR  
342 pathways (also associated with latent factor 15) may play a role in these events since it is a  
343 response to a variety of stimuli (chemokines, cytokines, complement fragments) and can trigger  
344 neutrophil degranulation<sup>17</sup>.

345  
346 In contrast, latent factor 18, which was also associated with  $\beta$ -cell decline, is characterized by  
347 features of enrichment of viral mRNA translation and subsequent translation by the host cell  
348 machinery. There is a considerable body of literature that associates viral infections with early  
349 events in type 1 diabetes development as well as peri-diagnosis events<sup>18</sup>. As a result, virus  
350 infection has often been cited as an autoimmunity-triggering event as well as a disease-  
351 precipitating event. Our findings in the context of the present study design are entirely  
352 consistent with the latter hypothesis, which could be addressed in follow-up viromic studies

353 targeted to samples in which both the relevant viral mRNA translation signals and negative  
354 slope of C-peptide decline are prominent.

355

356 Molecular and cellular signatures of adaptive immune responses were by and large not  
357 observed to be associated with  $\beta$ -cell decline in our study, which might at first sight be  
358 considered a surprise, given the strong credentials, at genomic, pathological and mechanistic  
359 levels, for type 1 diabetes being the archetype of an organ-specific autoimmune disease.  
360 However, it is entirely plausible that the detection of such associations is challenging in whole  
361 blood or whole mononuclear cell analyses, both because the disease-relevant,  $\beta$ -cell antigen-  
362 specific lymphocytes are rare, and even more importantly, because they may be sequestered at  
363 inflammatory sites. Certainly, smaller scale studies focused on using appropriately sensitive  
364 technologies have identified that the activation and differentiation state of circulating antigen-  
365 specific cytotoxic T lymphocytes, for example, correlate with changes in  $\beta$ -cell function after  
366 the diagnosis of type 1 diabetes<sup>8</sup>. Amongst the lymphocyte studies presented here, our  
367 observation of a prominent NK cell signal related to rapid  $\beta$ -cell decline is of considerable  
368 interest. NK cells have features of both innate and adaptive immune cells and play a key role  
369 in anti-viral responses. Both pro-inflammatory and regulatory functions have been ascribed to  
370 these cells, and functional subtypes can be partially differentiated by surface markers. Previous  
371 studies examining the frequency of NK cells in individuals affected by type 1 diabetes have  
372 consistently reported lower circulating levels of both proinflammatory and regulatory NK cells  
373 when compared to aged-matched non-diabetic subjects<sup>19,20,10</sup>, potentially reflecting homing to  
374 inflammatory sites in the pancreas. Consistent with this, we observed lower circulating levels  
375 of NK cells (both effector and regulatory subtypes according to surface markers) in the rapid  
376 decline group. Of interest, reduced circulating NK cell levels are also associated with viral  
377 infection, linking this observation to the viral signatures already described. Future functional  
378 studies will be required to explore the pathological implications of these findings, since the  
379 immune phenotyping performed here was limited to expression of CD38 (NK cell activation)  
380 and KLRG1 (an inhibitory receptor associated with an exhausted phenotype).

381

382 Key strengths of the study include (i) the setting of a large, longitudinal natural history study  
383 conducted across multiple European sites according to standardized clinical and laboratory  
384 protocols; (ii) access through the INNODIA network to highly specialized, systems-based  
385 technology platforms for parallel multi-parametric analysis; (iii) leverage of new tools in  
386 integrated multi-omics factor analysis to discover signatures that are significantly associated

387 with rate of disease progression for the year following diagnosis. This period of the disease is  
388 important since it represents the phase during which disease-modifying immunotherapies are  
389 typically trialed for their effect on arresting  $\beta$ -cell decline. Factors identifiable at baseline that  
390 associate with faster  $\beta$ -cell decline could be used to conduct shorter and smaller trials (e.g. by  
391 enrollment of a rapid-decline group), an important step towards de-risking the investment  
392 needed to bring disease modifying strategies into clinical use.

393

394 Finally, we want to highlight specificities of the present study that can be interpreted as  
395 limitations or strengths. Our INNODIA natural history collection involves individuals from the  
396 ages of one up to 45 years, and thus includes the whole lifespan of people living with type 1  
397 diabetes. Although this may render interpretation of findings in this clearly heterogenic disease  
398 more complex, it may add to the identification of common factors that drive disease,  
399 irrespective of age. We used fasting C-peptide as read-out for  $\beta$ -cell function rather than  
400 stimulated C-peptide and could demonstrate similar trends in decline of function using this  
401 simple parameter. Although collecting throughout Europe, the population studied is almost  
402 completely white Caucasian, thus limiting the generalizability of the findings to a global  
403 population, where type 1 diabetes is becoming more prevalent in non-Caucasian people.  
404 Confirmation of our observations will therefore be needed in more diverse cohorts. Our work  
405 reports on a small cohort of just under 100 people with newly diagnosed disease. However, we  
406 demonstrate that even in such small numbers, using deeply phenotyped individuals and  
407 standardized operating procedures, application of systems biology techniques can lead to  
408 significant associations. Here we believe that the collaboration between academics,  
409 foundations, industry and people affected by type 1 diabetes and their families within  
410 INNODIA was a unique driver. We created strict protocols for follow up where people could  
411 be convinced to participate with support of materials created by the PAC (People with diabetes  
412 Advisory Committee), we set up a highly standardized sample collection (e.g. even  
413 standardizing the pipet tips for miRNA sample collection) and applied homogeneous  
414 laboratory procedures. Importantly, we brought all data into a GDPR-conform centralized  
415 database, allowing clean data collection and high quality data for input into the analysis.

416

417 In summary, the presented study addressed the drivers of disease heterogeneity in type 1  
418 diabetes by leveraging opportunities presented by a highly integrated clinical network featuring  
419 embedded research platforms with the capability to generate large systems-level datasets. One  
420 of the two factors identified showed correlation to neutrophil degranulation, cytokine signaling,

421 lymphoid and non-lymphoid cell interactions and G-protein coupled receptor signaling events,  
422 while the second signature, pathways related to translation and viral infection were inversely  
423 associated with change in  $\beta$ -cell function. The derived latent factors were used to identify  
424 specific signatures, which were further investigated for biomarker opportunities and  
425 mechanistic pathways that correlate with  $\beta$ -cell decline. This shows how multi-omics analysis  
426 can be used as an important foundation for the development and testing of disease-modifying  
427 therapies in the future.



## 428 **Methods**

### 429 **Subjects with type 1 diabetes**

430 For this in depth analysis, we included the first 100 subjects with newly diagnosed (<6 weeks)  
431 type 1 diabetes enrolled in the INNODIA natural history study. Using a consecutive  
432 recruitment approach, subjects were included based on baseline omics data availability, an even  
433 gender distribution and biosample availability, positivity for at least one diabetes-related  
434 autoantibody (GADA, IA-2A, IAA, ZnT8A), and age between one to 45 years. Two subjects  
435 were excluded due to incomplete ‘omics datasets and one following the detection of a MODY  
436 gene mutation. The final analysis cohort comprised 49 male and 48 female study participants  
437 (Table 1), the average age at diabetes diagnosis of 13.2 years (SD 8.5; two-ten years n=38; ten-  
438 18 years n=41, 18-39 years n=18), mean disease duration of 3.9 weeks (SD 1.5) and at baseline  
439 an average total daily insulin dose of 0.51 IU/kg (SD 0.27), HbA1c of 75 mmol/mol (SD 21.3),  
440 fasting C-peptide level of 269 pmol/l (IQR 25.7), fasting glucose level of 7.78 mmol/l (IQR  
441 2.8) and BMI SDS of 0.327 units (SD 1.1). Fasted C-peptide measurements were made at four  
442 visits (Fig. 1A). To define the rate of C-peptide decline over time, we utilized linear mixed-  
443 effect models to fit the log-transformed fasted C-peptide from day of diagnosis to 12 months  
444 (Fig. 1B). The model was fitted using subject-level random effects and the rate of C-peptide  
445 change over time. Mixed-effect models were fit using the lme4 R package<sup>21</sup> with an  
446 unstructured random effects variance-covariance matrix.

447

448 Some individuals did not complete all visits. A total of 69 individuals completed the four visits  
449 (baseline, three, six, and 12 months), 21 individuals completed three visits, five individuals  
450 completed two visits, and two individuals completed only the baseline visit (not necessarily  
451 consecutive visits). At each visit HbA1c was measured and stimulated C-peptide response was  
452 determined by mixed meal tolerance test (MMTT) from individuals of at least five years of  
453 age. The islet autoantibodies GADA, IA-2A, IAA, and ZnT8A were quantified with the use of  
454 specific radiobinding assays as described earlier<sup>22</sup>.

455

### 456 **Targeted serum proteomics by liquid chromatography-mass spectrometry (LC-MS/MS)**

457 Targeted proteomics of baseline serum samples from 91 individuals was performed using  
458 liquid chromatography with selected reaction monitoring (SRM) mass spectrometry (LC-  
459 MS/MS) to measure 195 peptides, representing 98 target proteins and retention time markers.  
460 The list of peptides and proteins measured is provided in Supplementary Table 1.



461 The samples were reduced, digested, and alkylated, then spiked with isotopically labelled  
462 synthetic analogues of the targets, as previously described<sup>23</sup>. The batchwise analyses of the  
463 samples were made with the periodic inclusion of three internal QC reference controls. Skyline  
464 software<sup>24</sup> was used to both develop the acquisition method and perform primary processing  
465 of the data, including peak integration and quality assessment. The un-normalized data was  
466 subsequently exported and prepared for batch correction and normalization<sup>25</sup>.

467

### 468 **Whole blood transcriptomics**

469 We performed transcriptome analysis on whole blood samples collected from 92 individuals  
470 as well as four reference RNAs (two anonymous donors) used for normalization and assessing  
471 batch effects across sample pools. Prior to RNA extraction, frozen whole blood PAXgene  
472 samples were thawed at room temperature for 2 hours and subjected to RNA extraction using  
473 PAXgene Blood miRNA Kit (PreAnalytix/QIAGEN, Cat# 763134). Total RNA, including  
474 RNA longer than approximately 18 nucleotides, was purified according to the manufacturer's  
475 protocol. Sample concentration was measured with a Nanodrop 2000 spectrophotometer and  
476 Qubit Fluorometric Quantitation (Thermo Fisher Scientific).

477 The quality of the samples was ensured with the Experion Automated Electrophoresis System  
478 (Bio Rad) and Agilent 2100 Bioanalyzer RNA Pico chip. Library preparation and sequencing  
479 were carried out at the Finnish Functional Genomics Centre (FFGC). Before starting library  
480 preparation, ERCC Spike-in Mix 1 (Invitrogen P/N 4456739) was added to 100 ng RNA  
481 according to the kit's protocol. RNAseq libraries were prepared using the TruSeq stranded  
482 mRNA HT kit and protocol # 15031047 (Illumina). The quality and quantity of the amplified  
483 libraries were measured using Advanced Analytical Fragment Analyzer (Agilent) and Qubit  
484 Fluorometric Quantitation, respectively. Pooled libraries were sequenced on an Illumina  
485 NovaSeq 6000 instrument, using 2x50 bp paired-end sequencing. bcl2fastq2 Conversion  
486 Software v2.20.0.422 was used to convert base call files into FASTQ files. The quality of the  
487 raw sequencing reads was checked using the FastQC tool (v. 0.11.14). The sequencing data  
488 preprocessing was carried out using R (v. 3.6.1) and the related Bioconductor module (v. 3.9).  
489 The reads were aligned to UCSC hg38 human reference genome (downloaded from Illumina  
490 iGenomes site [https://support.illumina.com/sequencing/sequencing\\_software/igenome.html](https://support.illumina.com/sequencing/sequencing_software/igenome.html))  
491 using Rsubread package (v. 1.34.7) and the same package was used to produce the read counts  
492 for the RefSeq annotated genes. The gene-wise counts per million (CPM) were generated using  
493 the edgeR package (v. 3.26.8).

494

## 495 **Circulating Small RNAs sequencing**

496 Expression levels of circulating Small RNAs were analyzed from baseline plasma samples of  
497 n=91 subjects on the same sample set adopting two different Next Generation Sequencing  
498 (NGS) approaches: (i) probes-based sequencing focused on miRNAs (targeted) through HTG  
499 EdgeSeq miRNA whole transcriptome assay (Supplementary Table 2); (ii) Small RNAs  
500 sequencing using the QiaSeq miRNA/small RNA library preparation kit (untargeted).  
501 Plasma samples were shipped to HTG Molecular Inc. in order to be analyzed using rigorous  
502 standard procedures. The HTG EdgeSeq miRNA whole transcriptome assay method is an RNA  
503 extraction free approach that exploits quantitative nuclease protection assay chemistry using  
504 sequence-specific nuclease-protection probes (NPPs). This was followed by an NGS step, in  
505 order to allow semi-quantitative analysis of a panel of n=2102 targeted miRNAs (including  
506 n=13 housekeeping, n=5 negative process controls, n=1 positive process control and n=2083  
507 targeted miRNAs) from 15  $\mu$ L of plasma. HTG EdgeSeq Plasma Lysis buffer was added to 15  
508  $\mu$ L of each plasma sample. Lysed samples were then transferred to a standard 96-well plate.  
509 The NPPs were added to the lysed samples followed by the addition of S1 nuclease to digest  
510 non-hybridized RNA. The nuclease digestion reaction was then stopped and each processed  
511 sample was used as a template for PCR-based library preparation using specifically designed  
512 primers (tags), which share common sequences complementary to 5'-end and 3'-end "wing"  
513 sequences of the probes and common adapters required for cluster generation on Illumina NGS  
514 platform. Libraries were prepared in accordance with HTG standard procedures, HTG EdgeSeq  
515 PCR processing, and HTG EdgeSeq AMPure cleanup of Illumina Sequencing Libraries.  
516 Libraries concentration was evaluated by the HTG EdgeSeq KAPA Library quantification kit,  
517 and each library was normalized and pooled using the HTG EdgeSeq RUO library calculator.  
518 Then, pooled libraries were denatured in 2 N NaOH and sequenced (final concentration 4 pM)  
519 onto Illumina NextSeq550 platform (High Output kit v.2 cat. FC-404-2005). Data were  
520 returned from the sequencer as demultiplexed FASTQ files. The resulting reads (on average  
521 79% passing filter, corresponding to a total of  $8.33 \times 10^8$  passing filter reads) were aligned  
522 referring to miRbase v.20 using HTG Parser software. Raw reads were standardized into CPM  
523 and filtered through the "limma Edge R" R Bioconductor package. For the QiaSeq Small RNA  
524 sequencing, total RNA extraction was performed from 200  $\mu$ L of plasma through  
525 Serum/Plasma Norgen kit (cat. 55000). Small RNA Libraries were prepared using the QiaSeq  
526 miRNA library kit (cat. 331505) following the manufacturer's instructions. QiaSeq strategy  
527 assigns Unique Molecular Index (UMI) during reverse transcription step to every mature  
528 miRNA molecule, in order to enable unbiased and accurate Small RNAome-wide

529 quantification of mature miRNAs and additional small RNAs by NGS. Libraries quality control  
530 (QC) was performed by quantifying their concentration through QUBIT 3.0 spectrofluorometer  
531 (Qubit™ dsDNA HS Assay Kit, cat. Q32854) and assessing their quality using capillary  
532 electrophoresis in Bioanalyzer 2100 (Agilent High Sensitivity DNA kit cat. 5067-4626). The  
533 quality of libraries was evaluated considering electropherograms showing a peak comprised  
534 between 175 and 185 bp as high quality. Following QC, all libraries were normalized until 2  
535 nM and pooled, denatured in 0.2 N NaOH, and further sequenced (final concentration 175 pM)  
536 using the Illumina NovaSeq 6000 platform (NovaSeq 6000 SP Reagent Kit (100 cycles)  
537 cat. 20027464, NovaSeq XP 2-Lane Kit cat. 20021664, using the XP protocol applying 75x1  
538 single reads). Data were returned from the sequencer as demultiplexed FASTQ files. Resulting  
539 reads (on average 87% passing filter, corresponding to a total of  $1.11 \times 10^9$  passing filter reads)  
540 were mapped using QIAGEN Gene Globe data analysis center software, which adopts a  
541 sequential alignment strategy to map to different databases (perfect match to miRbase v.21  
542 mature, miRBase hairpin, noncoding RNA, mRNA and other RNA, and ultimately a second  
543 mapping to miRBase mature, where up to two mismatches are tolerated) using bowtie (bowtie-  
544 bio.sourceforge.net/index.shtml). At each step, only mapped sequences were passed to the next  
545 step.

546

#### 547 **Plasma Metabolomics (GCxGC-MS)**

548 83 metabolites, covering various amino acids, fatty acids and sugars etc. (Supplementary Table  
549 3), was generated from baseline plasma samples as described before<sup>26</sup>. In brief, 30  $\mu$ L blood  
550 samples from 93 participants were spiked with 10  $\mu$ L of the internal standard mixture (d4-  
551 succinic acid, d5-glutamic acid, d8-valine, and d33-heptadecanoic acid.; Sigma Aldrich).  
552 Samples were vortex-mixed and incubated on ice for 30 min and centrifuged (10,000 rpm, 3  
553 min, 4°C). Finally, 180  $\mu$ L of the filtered extracts were transferred to glass vials and evaporated  
554 dry before derivatization.

555 The samples were derivatized using a previously described procedure<sup>27</sup>, where reactive groups  
556 are converted into trimethylsilyl derivates, which increases the volatility of the biomolecules.  
557 The polar metabolites were then analyzed using a Pegasus 4D (LECO; Saint Joseph; USA)  
558 system, which combines two-dimensional chromatographic separation with time-of-flight  
559 (TOF) mass spectrometric detection. Identifications were assigned using the National Institute  
560 of Standards (NIST) database and Steno Diabetes Center Copenhagen in-house libraries. After  
561 data acquisition, the raw data were pre-processed into a peak table with ChromaTOF (LECO;

562 Saint Joseph; USA). Finally, data were post-processed in R by batch correction, truncation of  
563 outliers, and imputation of missing values.

564

### 565 **Plasma Lipidomics (LC-MS)**

566 The lipidome (Supplementary Table 4) was measured from baseline plasma samples of 94  
567 individuals and two unrelated control samples in four replicates following lipid extraction from  
568 a 10  $\mu$ L plasma sample using a chloroform:methanol (2:2 V/V) lipid extraction method<sup>28</sup>. Nine  
569 stable isotope labelled and non-physiological lipid species were spiked as internal standards.  
570 (Supplementary Table 5).

571 Samples were analysed in positive and negative ion modes of ultra-high-performance liquid-  
572 chromatography mass-spectrometry (UHPLC-MS; Agilent Technologies; Santa Clara, CA,  
573 USA) at Steno Diabetes Center Copenhagen as described previously<sup>29-30</sup>. After data  
574 acquisition, the raw data were pre-processed into a peak table with MZmine 2. Finally, data  
575 were post-processed in R by denoising as normalization to internal standards, batch correction,  
576 truncation of outliers, and imputation of missing values.

577

578 Nine stable isotope labelled and non-physiological lipid species were spiked as internal  
579 standards (Supplementary data table 2).

580

581

### 582 **PBMC (cryopreserved) multi-dimensional flow cytometry (Multi-FACS) immunomics**

583 The immunome was examined using cryopreserved peripheral blood mononuclear cells  
584 (PBMCs; that were freshly isolated and cryopreserved in Cryostor) from 76 baseline blood  
585 samples (Na-heparin) shipped in liquid nitrogen and processed at a single site by Multi-FACS.  
586 36-marker Multi-FACS Cytex Aurora panel (plus one viability dye) was set up and a specific  
587 flow gating strategy that allowed enumeration of 150 cell populations was applied  
588 (Supplementary Table 6).

589 All flow data were also analyzed by OMIQ platform ([www.omiq.ai](http://www.omiq.ai)), including unbiased  
590 clustering (FlowSOM) and dimensionality reduction (UMAP). In FlowSOM analysis, the  
591 median intensity of 36 markers were used to generate 100 nodes, which were further clusters  
592 as meta-cluster (k=30, grey area on FlowSOM map under randomized speed and Euclidean  
593 distancing metric). FlowSOM map provides a concise representation of the number of cell  
594 types and visualization of the differential marker profiles by color-density.

595

596 Samples were processed in five batches (between 12 to 16 samples per batch, consisting of a  
597 mixture of samples from each of the five INNODIA immune laboratories) together with two  
598 unrelated control samples in each batch using one  $2.5 \times 10^6$  PBMCs per sample except for two  
599 samples where two aliquots were used due to poor percentage of recovery (range from 11.2 to  
600 228.8%, average of 68.1%). Viability assessed by trypan blue ranged between 70 and 100%  
601 (average 94%). An average of  $1.51 \times 10^6$  (range  $0.54$ - $2.8 \times 10^6$ ) cells were used for staining. List  
602 of Multi-FACS flow panel antibodies and reagents used is detailed in Supplementary data table  
603 3. PBMCs were first stained using Live/dead blue for 15 min at room temperature, washed with  
604 FACS buffer (PBS with 0.2% BSA and 2mM EDTA), and incubated with Fc receptor blocker  
605 (TruStain FcX Fc; BioLegend) for 10 min at room temperature. Without wash, samples were  
606 stained in a 37°C waterbath for 15 min using mastermix 1 (containing antibodies against  
607 CXCR3, CD117, CD294/CRTH2, and CD161). Samples were further stained in waterbath for  
608 15 min using mastermix 2 (containing antibodies against CXCR5, ICOS, CCR7, and CCR6),  
609 followed by 30 min at room temperature using mastermix 3 (Supplementary data table 3).  
610 Finally, samples were washed using FACS buffer, then fixed and resuspended in PBS  
611 containing 1% paraformaldehyde (Alfa Aesar). Single colour controls were made using PBMC  
612 for all colours except for CD294, CD117, CD161, and TCRgd where BD mouse or rat comp  
613 beads were used instead due to low cell expression. Single colour controls were subjected to  
614 the same buffer and fixed as the multi-colour stained samples. SpectroFlo QC beads were run  
615 daily and single colour controls were acquired in the reference library, which was subsequently  
616 used for live unmixing during sample acquisition on a Cytex Aurora cytometer. Flow data were  
617 analysed using FlowJo software (an example of the gating strategy is shown in Supplementary  
618 Fig. 8 and checked by an independent reviewer).

619

## 620 **Multi-omics data pre-processing, integration, and analysis**

621 For transcriptomics and miRNA data, the DESeq 2 package<sup>31</sup> was used to normalize the counts  
622 using the variance stabilizing transformation (VST). The transcriptomics and miRNA data sets  
623 were filtered for low counts (features with less than 10 counts in total or features with zero  
624 counts in more than 90% of the samples). The proteomics, metabolomics, lipidomics and  
625 immunomics data sets were log<sub>2</sub> transformed. The transcriptomics, proteomics, and  
626 immunomics data were corrected for batch effects associated with dataset-specific factors  
627 (sequencing at different days or different handling of the samples) using the limma package in  
628 R. Finally, all the data sets were corrected for age. The age was log-transformed to account for  
629 the growth effect in children (one year difference in adults is not equivalent to one year

630 difference in children). This was necessary due to the high degree of age heterogeneity present  
631 in the cohort and the association of the fasted C-Peptide slopes with age.

632

633 The omics data sets were integrated using the general framework in the Multi-Omics Factor  
634 Analysis (MOFA) package from 2018<sup>32</sup>. MOFA performs a dimensionality reduction of the  
635 omics data into a lower-dimensional latent space (Fig. 1C). The latent factors generated by  
636 MOFA capture sources of global variability across the different omics data sets. Each factor  
637 has an underlying weight for every feature, which can be used to annotate the factors in terms  
638 of omics features, yielding a specific molecular signature for each factor. MOFA was run with  
639 default parameters and 20 latent factors. The model was initialized with different random seeds  
640 yielding similar results, generally only altering the number assigned to each factor associated  
641 with the C-peptide slopes.

642

643 Latent factors were associated with the C-peptide slopes using the Spearman correlation. Other  
644 covariates were also analyzed such as age at baseline and C-peptide at baseline. The association  
645 of the latent factors with the progression groups was calculated using the Kruskal-Wallis test  
646 and each group was compared using a Mann-Whitney U test.

647

648 Gene Set Enrichment Analysis (GSEA)<sup>33</sup> was performed in order to better characterize the  
649 genes with the largest weight in the latent factors. This analysis was performed using the  
650 MOFA GSEA function that utilizes a modified version of the principal component gene set  
651 enrichment scheme (PCGSE)<sup>34</sup>. The Reactome database was the gene set annotation used for  
652 this analysis. The GSEA was performed separately for genes with a positive and negative  
653 weight in each latent factor. This was done to avoid combining genes that are upregulated  
654 (positive weight) and downregulated (negative weight) in the latent factor, as these two groups  
655 of genes might be involved in different biological pathways. The top 15 significant pathways  
656 for each latent factor (positive and negative weights) were selected and grouped by biological  
657 pathway.

658

659 Differential gene expression of individual genes was determined with the DESeq 2 package<sup>31</sup>.  
660 Models included covariates for the batch variable (different runs) and the age of the people.  
661 Age was encoded as a categorical variable defined in three groups, less than ten years, between  
662 ten and 18 years, and more than 18 years. Differential gene expression was assessed between  
663 rapid and slow groups, rapid and increasing and slow and increasing, respectively.



664

665 For biological network analysis, two types of interaction networks were constructed. One was  
666 compiled from the STRING<sup>35</sup> database to study protein-protein interactions or associations  
667 only. Another network was compiled from the mirTarBase<sup>36</sup> (miRNA-gene), which was  
668 combined with the STRING network to study protein-protein-miRNA interactions or  
669 associations. The STRING database was filtered for high-confidence interactions (combined  
670 score above 0.7) and miRNA-gene interactions had to be reported by at least two publications  
671 and two non-high-throughput methods. We decided to focus on genes and miRNAs only  
672 because those were the omics types with higher weights in the most relevant latent factors.

673

674 The association between the biological networks and the latent factors was performed using  
675 the PCSF graph optimization approach. This method allows us to interpret the biological  
676 landscape of the interaction network based on the importance/weight of each gene/miRNA in  
677 the latent factor. The output is a subnetwork that captures interactions between the  
678 genes/miRNAs with a higher importance in the latent factor. In order to select a subset of genes  
679 and miRNAs to construct the network, only genes with normalized absolute weights three-fold  
680 higher than expected by chance and miRNAs with normalized absolute weights two-fold higher  
681 than expected by chance were selected. Grid-search was performed to select the best  
682 parameters based on the network that had a high number of genes/miRNA from the latent factor  
683 while keeping number of genes/miRNA not observed in the latent factor low  
684 ( $\mu=0.005$ ,  $\omega=1$ ,  $\beta=5000$ ). The final network was constructed using 20 runs with noise to edge  
685 costs ( $r=0.1$ ) that were combined and clustered using the edge-betweenness algorithm. Gene  
686 set enrichment analysis was performed on the clusters obtained from the network.

687 **Figures**

688

689 Fig. 1. Cohort data and analysis overview. A) The cohort consists of 97 people with newly  
690 diagnosed type 1 diabetes. Multi-omics data were collected at baseline (within six weeks after  
691 diagnosis of type 1 diabetes) and clinical data were collected at baseline and at three, six, and  
692 12 months. B) Participants were divided into three groups based on their change of insulin  
693 secretion levels (fasted C-peptide measurements) from baseline to 12 months. C) Multi-  
694 Omics Factor Analysis was performed to obtain an integrated signature across omics data  
695 types followed by differential expression analysis for each omics data type independently.  
696

697 Fig. 2: Fasted C-peptide trends over time. Time is represented as days from type 1 diabetes  
698 diagnosis. A) C-peptide values over time for all participants. B) C-peptide values over time  
699 divided into progression groups (progression terciles). C) C-peptide values over time for  
700 different age groups. D) C-peptide values over time for males and females, respectively.  
701

702 Fig. 3. A) Overview of the multi-omics data sets, describing the number of features per data  
703 set and the level of missing data (white). B) Latent factors obtained from MOFA, the color  
704 scale represents the variance captured by each of the latent factors indicating the level of  
705 integration of the data types for each factor. C) Association of latent factors 15 and 18 values  
706 with the different progression groups. D) Spearman correlation of latent factors with the  
707 fasted C-peptide slopes, baseline fasted C-Peptide, Age (log scale), and BMI-SDS. P-values  
708 were adjusted by Benjamini-Hochberg. E) Spearman correlation of fasted C-peptide slopes  
709 against latent factor values (15 and 18).  
710

711 Fig. 4. Volcano plot of differential gene expression between progression groups. The color  
712 indicates gene membership to either or both associated latent factors. A) DGE between rapid  
713 and increasing progression groups (339 genes are differentially expressed). B) DGE between  
714 rapid and slow progression groups (33 genes are differentially expressed). C) DGE between  
715 slow and increasing progression groups (1,206 genes are differentially expressed). D) DGE  
716 for C-peptide slopes (484 genes are differentially expressed).  
717

718

718 Fig. 5. GSEA was performed separately for genes with positive weights in the latent factor  
719 (upregulated in rapid decline) and genes with negative weights in the latent factor



720 (downregulated in rapid decline). Pathways are coloured depending on the main pathway  
721 they belong to, according to Reactome. P-values were adjusted using Benjamini-Hochberg.  
722  
723 Fig. 6. Immunomics association with C-peptide slopes. A) Benjamini-Hochberg adjusted p-  
724 value for the linear association of immune cells abundances with the C-peptide slopes  
725 (correcting for batch effects and age groups). B) NK cell levels for the different progression  
726 groups (as a frequency of total live mononuclear cells). C) Spearman correlation of fasted C-  
727 peptide slopes versus NK cell frequency for the different progression groups. D) FlowSOM  
728 unbiased cluster analysis on live CD45<sup>+</sup> PBMCs of Donor D07 (Increasing, left) and K40  
729 (Rapid, right) highlighting Metacluster-19 (red-circle) as a primary NK (CD56<sup>lo</sup>CD16<sup>+</sup>)  
730 subset. Colour-density and circle size were overlaid as CD16 intensity and number of events,  
731 respectively. E) Bar charts representing NK marker expression on the selected clusters in  
732 each progression group.  
733

734 **Tables**

735 Table 1. Clinical and demographic data for the type 1 diabetes cohort across progression  
736 groups. P-values were calculated using the Kruskal-Wallis test.

737

|                                 | <b>Rapid<br/>(N=33)</b>         | <b>Slow<br/>(N=32)</b>         | <b>Increasing<br/>(N=32)</b>    | <b>P-value</b> | <b>Overall<br/>(N=97)</b>       |
|---------------------------------|---------------------------------|--------------------------------|---------------------------------|----------------|---------------------------------|
| <b>Sex</b>                      |                                 |                                |                                 |                |                                 |
| Female                          | 20 (60.6%)                      | 15 (46.9%)                     | 13 (40.6%)                      | 0.256          | 48 (49.5%)                      |
| Male                            | 13 (39.4%)                      | 17 (53.1%)                     | 19 (59.4%)                      |                | 49 (50.5%)                      |
| <b>Age (years)</b>              |                                 |                                |                                 |                |                                 |
| Mean (SD)                       | 11.2 (9.17)                     | 12.9 (7.94)                    | 15.6 (7.94)                     | 0.0125         | 13.2 (8.49)                     |
| Median (IQR)<br>[Min, Max]      | 9.60 (8.97) [2.01,<br>38.1]     | 10.9 (8.68) [2.08,<br>36.4]    | 13.4 (5.23) [7.57,<br>38.8]     |                | 11.8 (8.08) [2.01,<br>38.8]     |
| <b>Age Intervals</b>            |                                 |                                |                                 |                |                                 |
| <10                             | 17 (51.5%)                      | 14 (43.8%)                     | 7 (21.9%)                       | 0.16           | 38 (39.2%)                      |
| >10-18                          | 11 (33.3%)                      | 12 (37.5%)                     | 18 (56.3%)                      |                | 41 (42.3%)                      |
| >18                             | 5 (15.2%)                       | 6 (18.8%)                      | 7 (21.9%)                       |                | 18 (18.6%)                      |
| <b>Disease duration (weeks)</b> |                                 |                                |                                 |                |                                 |
| Mean (SD)                       | 3.88 (1.52)                     | 3.80 (1.66)                    | 4.10 (1.43)                     | 0.843          | 3.93 (1.53)                     |
| Median (IQR)<br>[Min, Max]      | 4.40 (2.50)<br>[0.900, 6.40]    | 4.35 (2.35)<br>[0.900, 6.30]   | 4.40 (1.70)<br>[0.700, 6.10]    |                | 4.40 (2.20)<br>[0.700, 6.40]    |
| <b>BMI SDS</b>                  |                                 |                                |                                 |                |                                 |
| Mean (SD)                       | 0.0719 (1.05)                   | 0.397 (1.02)                   | 0.511 (1.20)                    | 0.153          | 0.327 (1.10)                    |
| Median (IQR)<br>[Min, Max]      | 0.0800 (1.19) [-<br>2.32, 2.47] | 0.350 (1.60) [-<br>1.56, 2.72] | 0.610 (1.35) [-<br>2.00, 2.28]  |                | 0.260 (1.57) [-<br>2.32, 2.72]  |
| Missing                         | 1 (3.0%)                        | 0 (0%)                         | 0 (0%)                          |                | 1 (1.0%)                        |
| <b>Glucose (mmol/l)</b>         |                                 |                                |                                 |                |                                 |
| Mean (SD)                       | 8.43 (5.57)                     | 8.42 (5.33)                    | 6.45 (2.20)                     | 0.22           | 7.78 (4.69)                     |
| Median (IQR)<br>[Min, Max]      | 7.10 (2.70) [3.70,<br>31.5]     | 6.70 (2.93) [3.60,<br>26.9]    | 6.10 (2.25) [3.70,<br>13.8]     |                | 6.40 (2.80) [3.60,<br>31.5]     |
| <b>Insulin dose (IU/kg)</b>     |                                 |                                |                                 |                |                                 |
| Mean (SD)                       | 0.544 (0.279)                   | 0.498 (0.247)                  | 0.498 (0.281)                   | 0.819          | 0.514 (0.268)                   |
| Median (IQR)<br>[Min, Max]      | 0.545 (0.291)<br>[0.136, 1.46]  | 0.468 (0.243)<br>[0.108, 1.20] | 0.500 (0.429)<br>[0.0359, 1.01] |                | 0.500 (0.354)<br>[0.0359, 1.46] |
| Missing                         | 1 (3.0%)                        | 1 (3.1%)                       | 0 (0%)                          |                | 2 (2.1%)                        |

|                                    |                          |                          |                          |        |                          |
|------------------------------------|--------------------------|--------------------------|--------------------------|--------|--------------------------|
| <b>HbA1c (mmol/mol)</b>            |                          |                          |                          |        |                          |
| Mean (SD)                          | 72.2 (21.4)              | 74.9 (24.2)              | 78.0 (18.1)              | 0.699  | 75.0 (21.3)              |
| Median (IQR) [Min, Max]            | 75.0 (27.3) [8.70, 119]  | 73.0 (29.5) [13.4, 130]  | 80.3 (22.4) [50.0, 130]  |        | 77.5 (25.7) [8.70, 130]  |
| Missing                            | 1 (3.0%)                 | 1 (3.1%)                 | 1 (3.1%)                 |        | 3 (3.1%)                 |
| <b>Baseline C-peptide (pmol/l)</b> |                          |                          |                          |        |                          |
| Mean (SD)                          | 235 (183)                | 248 (185)                | 324 (263)                | 0.296  | 269 (215)                |
| Median (IQR) [Min, Max]            | 165 (228) [26.1, 809]    | 240 (204) [15.0, 986]    | 264 (268) [25.8, 1290]   |        | 224 (239) [15.0, 1290]   |
| <b>12 Month C-peptide (pmol/l)</b> |                          |                          |                          |        |                          |
| Mean (SD)                          | 64.7 (59.8)              | 194 (137)                | 432 (206)                | <0.001 | 234 (214)                |
| Median (IQR) [Min, Max]            | 41.6 (83.5) [11.7, 222]  | 161 (136) [45.8, 635]    | 433 (246) [96.7, 896]    |        | 163 (283) [11.7, 896]    |
| Missing                            | 7 (21.2%)                | 9 (28.1%)                | 5 (15.6%)                |        | 21 (21.6%)               |
| <b>GADA</b>                        |                          |                          |                          |        |                          |
| Negative                           | 5 (15.2%)                | 11 (34.4%)               | 8 (25.0%)                | 0.199  | 24 (24.7%)               |
| Positive                           | 28 (84.8%)               | 21 (65.6%)               | 24 (75.0%)               |        | 73 (75.3%)               |
| <b>IA-2A</b>                       |                          |                          |                          |        |                          |
| Negative                           | 9 (27.3%)                | 12 (37.5%)               | 9 (28.1%)                | 0.615  | 30 (30.9%)               |
| Positive                           | 24 (72.7%)               | 20 (62.5%)               | 23 (71.9%)               |        | 67 (69.1%)               |
| <b>IAA</b>                         |                          |                          |                          |        |                          |
| Negative                           | 4 (12.1%)                | 10 (31.3%)               | 10 (31.3%)               | 0.118  | 24 (24.7%)               |
| Positive                           | 29 (87.9%)               | 22 (68.8%)               | 22 (68.8%)               |        | 73 (75.3%)               |
| <b>ZnT8A</b>                       |                          |                          |                          |        |                          |
| Negative                           | 12 (36.4%)               | 10 (31.3%)               | 14 (43.8%)               | 0.582  | 36 (37.1%)               |
| Positive                           | 21 (63.6%)               | 22 (68.8%)               | 18 (56.3%)               |        | 61 (62.9%)               |
| <b>Detectable autoantibodies</b>   |                          |                          |                          |        |                          |
| Mean (SD)                          | 3.09 (0.947)             | 2.66 (0.902)             | 2.72 (0.851)             | 0.0961 | 2.82 (0.913)             |
| Median (IQR) [Min, Max]            | 3.00 (2.00) [1.00, 4.00] | 3.00 (1.00) [1.00, 4.00] | 3.00 (1.00) [1.00, 4.00] |        | 3.00 (2.00) [1.00, 4.00] |

738  
739  
740

741 **Other**

742

743 *Data Availability*

744 The data generated and analysed is person-sensitive as it can be used to identify people based  
745 on their sequence variation and can be accessed in secure environments only. Access to data  
746 can be provided by application to the INNODIA Data Access Committee by emailing  
747 Professor Lut Overbergh ([lutgart.overbergh@kuleuven.be](mailto:lutgart.overbergh@kuleuven.be)). Processed results of GSEA  
748 analysis is available as supplementary material.

749

750 *Code Availability*

751 The primary software used for this work was Multi-Omics Factor Analysis (MOFA). The  
752 code for this software is available at <https://github.com/bioFAM/MOFA2>.

753

754 *Ethics Declaration*

755 The INNODIA study protocol was approved by the London – City & East Research Ethics  
756 Committee on 28 October 2016 (REC 16/LO/1750) IRAS Project ID 210497. Subsequently,  
757 after translation of the participants’ documentation, approval was obtained from local Ethic  
758 authorities throughout the entire INNODIA clinical network.

759

760 *Acknowledgments*

761 We gratefully acknowledge all participants of the INNODIA natural history study which built  
762 the basis for the work presented here. Without the outstanding engagement of the people with  
763 type diabetes and their relatives and friends participating in the INNODIA clinical efforts,  
764 this data and new knowledge gain would not have been possible. The authors also want to  
765 thank all the clinical personnel for their dedication in the participant recruitment,  
766 characterization, sample collection and preparation that was at the basis of this analysis. We

767 dedicate this work to the late Professor David Dunger, who inspired INNODIA and lay at the  
768 basis of this analysis.

769

770 *Author contributions*

771 JJAA, CB, SFAB, DBD, PJC, MK, AMS, GS, LLE, FD, TT, RL, LO, CM, MP, SB designed  
772 the study. JJAA, CB, KB, RM, NA-S, IM, CL-Q, TS, JHL, GEG, MKH, TS, OR, PJC, JHL,  
773 GS, TT collected data and performed analyses. JJAA, CHJ, TT, LO, CM, MP, SB wrote the  
774 manuscript. All authors revised the manuscript for crucial content and approved the final  
775 version. All authors had full access to all the data and had final responsibility for the decision  
776 to submit for publication. A complete list of the partners of the INNODIA consortium is  
777 included separately.

778

779 *Declaration of interests*

780 CM serves or has served on the advisory panel for Novo Nordisk, Sanofi, Merck Sharp and  
781 Dohme Ltd., Eli Lilly and Company, Novartis, AstraZeneca, Boehringer Ingelheim, Roche,  
782 Medtronic, ActoBio Therapeutics, Pfizer, Imcyse, Insulet, Zealand Pharma, Avotres,  
783 Mannkind, Sandoz and Vertex. Financial compensation for these activities has been received  
784 by KU Leuven; KU Leuven has received research support for CM from Medtronic, Imcyse,  
785 Novo Nordisk, Sanofi and ActoBio Therapeutics; CM serves or has served on the speakers  
786 bureau for Novo Nordisk, Sanofi, Eli Lilly and Company, Boehringer Ingelheim, Astra  
787 Zeneca and Novartis. Financial compensation for these activities has been received by KU  
788 Leuven.

789 S.Br. reports having received funding from INNODIA (grant agreement No 115797), having  
790 ownerships in Intomics A/S, Hoba Therapeutics Aps, Novo Nordisk A/S, Lundbeck A/S,  
791 ALK A/S and managing board memberships in Proscion A/S and Intomics A/S.

792 MK reports ownership and managing board membership in Vactech Oy.

793 CLQ reports serving on advisory boards of Fondation Alzheimer's and Institute Pasteur, and  
794 an affiliation with Novo Nordisk.

795 LO reports having received funding from INNODIA and INNODIA Harvest.

796

797 *Supplementary information*

798 Supplementary information is available for this paper as an appendix.

799

## 800 References

- 801 1. Warshauer, J.T., Bluestone, J.A., Anderson, M.S., 2020. New frontiers in the  
802 treatment of Type 1 diabetes. *Cell Metab.* 31, 46–61.  
803 <https://doi.org/10.1016/j.cmet.2019.11.017>
- 804 2. IDF, D.A., 2021. International Diabetes Federation. (No. 10th edn). Brussels,  
805 Belgium.
- 806 3. Miller, R.G., Orchard, T.J., 2020. Understanding Metabolic Memory: A Tale of Two  
807 Studies. *Diabetes* 69, 291–299. <https://doi.org/10.2337/db19-0514>
- 808 4. Rawshani, Araz, Sattar, N., Franzén, S., Rawshani, Aidin, Hattersley, A.T., Svensson,  
809 A.-M., Eliasson, B., Gudbjörnsdottir, S., 2018. Excess mortality and cardiovascular  
810 disease in young adults with type 1 diabetes in relation to age at onset: a nationwide,  
811 register-based cohort study. *Lancet Lond. Engl.* 392, 477–486.  
812 [https://doi.org/10.1016/S0140-6736\(18\)31506-X](https://doi.org/10.1016/S0140-6736(18)31506-X)
- 813 5. Tatovic D, Dayan CM. Replacing insulin with immunotherapy: Time for a paradigm  
814 change in Type 1 diabetes. *Diabet Med.* 2021 Dec;38(12):e14696. doi:  
815 10.1111/dme.14696.
- 816 6. Battaglia, M., Ahmed, S., Anderson, M.S., Atkinson, M.A., Becker, D., Bingley, P.J.,  
817 Bosi, E., Brusko, T.M., DiMeglio, L.A., Evans-Molina, C., Gitelman, S.E.,  
818 Greenbaum, C.J., Gottlieb, P.A., Herold, K.C., Hessner, M.J., Knip, M., Jacobsen, L.,  
819 Krischer, J.P., Long, S.A., Lundgren, M., McKinney, E.F., Morgan, N.G., Oram,  
820 R.A., Pastinen, T., Peters, M.C., Petrelli, A., Qian, X., Redondo, M.J., Roep, B.O.,  
821 Schatz, D., Skibinski, D., Peakman, M., 2020. Introducing the Endotype Concept to  
822 Address the Challenge of Disease Heterogeneity in Type 1 Diabetes. *Diabetes Care*  
823 43, 5–12. <https://doi.org/10.2337/dc19-0880>
- 824 7. Speake, C., Skinner, S.O., Berel, D., Whalen, E., Dufort, M.J., Young, W.C.,  
825 Odegard, J.M., Pesenacker, A.M., Gorus, F.K., James, E.A., Levings, M.K., Linsley,  
826 P.S., Akirav, E.M., Pugliese, A., Hessner, M.J., Nepom, G.T., Gottardo, R., Long,  
827 S.A., 2019. A composite immune signature parallels disease progression across T1D  
828 subjects. *JCI Insight* 4. <https://doi.org/10.1172/jci.insight.126917>
- 829 8. Yeo, L., Woodwyk, A., Sood, S., Lorenc, A., Eichmann, M., Pujol-Autonell, I.,  
830 Melchiotti, R., Skowera, A., Fidanis, E., Dolton, G.M., Tungatt, K., Sewell, A.K.,  
831 Heck, S., Saxena, A., Beam, C.A., Peakman, M., 2018. Autoreactive T effector  
832 memory differentiation mirrors  $\beta$  cell function in type 1 diabetes. *J. Clin. Invest.* 128,  
833 3460–3474. <https://doi.org/10.1172/JCI120555>
- 834 9. Dunger DB, Bruggraber SFA, Mander AP, Marcovecchio ML, Tree T, Chmura PJ,  
835 Knip M, Schulte AM, Mathieu C; INNODIA consortium. INNODIA Master Protocol  
836 for the evaluation of investigational medicinal products in children, adolescents and  
837 adults with newly diagnosed type 1 diabetes. *Trials.* 2022 May 18;23(1):414. doi:  
838 10.1186/s13063-022-06259-z.
- 839 10. Oras A, Peet A, Giese T, Tillmann V, Uibo R. A study of 51 subtypes of peripheral  
840 blood immune cells in newly diagnosed young type 1 diabetes patients. *Clin Exp*  
841 *Immunol.* 2019 Oct;198(1):57-70. doi: 10.1111/cei.13332.
- 842 11. Chen, B., Khodadoust, M.S., Liu, C.L., Newman, A.M., Alizadeh, A.A., 2018.  
843 Profiling tumor infiltrating immune cells with CIBERSORT. *Methods Mol. Biol.*  
844 Clifton NJ 1711, 243–259. [https://doi.org/10.1007/978-1-4939-7493-1\\_12](https://doi.org/10.1007/978-1-4939-7493-1_12)
- 845 12. Harsunen MH, Puff R, D'Orlando O, Giannopoulou E, Lachmann L, Beyerlein A, von  
846 Meyer A, Ziegler AG. Reduced blood leukocyte and neutrophil numbers in the  
847 pathogenesis of type 1 diabetes. *Horm Metab Res.* 2013 Jun;45(6):467-70. doi:  
848 10.1055/s-0032-1331226.

- 849  
850  
851  
852  
853  
854  
855  
856  
857  
858  
859  
860  
861  
862  
863  
864  
865  
866  
867  
868  
869  
870  
871  
872  
873  
874  
875  
876  
877  
878  
879  
880  
881  
882  
883  
884  
885  
886  
887  
888  
889  
890  
891  
892  
893  
894  
895  
896  
897
13. Valle A, Giamporcaro GM, Scavini M, Stabilini A, Grogan P, Bianconi E, Sebastiani G, Masini M, Maugeri N, Porretti L, Bonfanti R, Meschi F, De Pellegrin M, Lesma A, Rossini S, Piemonti L, Marchetti P, Dotta F, Bosi E, Battaglia M. Reduction of circulating neutrophils precedes and accompanies type 1 diabetes. *Diabetes*. 2013 Jun;62(6):2072-7. doi: 10.2337/db12-1345.
  14. Wang Y, Xiao Y, Zhong L, Ye D, Zhang J, Tu Y, Bornstein SR, Zhou Z, Lam KS, Xu A. Increased neutrophil elastase and proteinase 3 and augmented NETosis are closely associated with  $\beta$ -cell autoimmunity in patients with type 1 diabetes. *Diabetes*. 2014 Dec;63(12):4239-48. doi: 10.2337/db14-0480.
  15. Vecchio F, Lo Buono N, Stabilini A, Nigi L, Dufort MJ, Geyer S, Rancoita PM, Cugnata F, Mandelli A, Valle A, Leete P, Mancarella F, Linsley PS, Krogvold L, Herold KC, Elding Larsson H, Richardson SJ, Morgan NG, Dahl-Jørgensen K, Sebastiani G, Dotta F, Bosi E; DRI\_Biorepository Group; Type 1 Diabetes TrialNet Study Group, Battaglia M. Abnormal neutrophil signature in the blood and pancreas of presymptomatic and symptomatic type 1 diabetes. *JCI Insight*. 2018 Sep 20;3(18):e122146. doi: 10.1172/jci.insight.122146.
  16. Popp SK, Vecchio F, Brown DJ, Fukuda R, Suzuki Y, Takeda Y, Wakamatsu R, Sarma MA, Garrett J, Giovenzana A, Bosi E, Lafferty AR, Brown KJ, Gardiner EE, Coupland LA, Thomas HE, Chong BH, Parish CR, Battaglia M, Petrelli A, Simeonovic CJ. Circulating platelet-neutrophil aggregates characterize the development of type 1 diabetes in humans and NOD mice. *JCI Insight*. 2022 Jan 25;7(2):e153993. doi: 10.1172/jci.insight.153993.
  17. Othman A, Sekheri M, Filep JG. Roles of neutrophil granule proteins in orchestrating inflammation and immunity. *FEBS J*. 2021 Mar 8. doi: 10.1111/febs.15803.
  18. Vehik K, Lynch KF, Wong MC, Tian X, Ross MC, Gibbs RA, Ajami NJ, Petrosino JF, Rewers M, Toppari J, Ziegler AG, She JX, Lernmark A, Akolkar B, Hagopian WA, Schatz DA, Krischer JP, Hyöty H, Lloyd RE; TEDDY Study Group. Prospective virome analyses in young children at increased genetic risk for type 1 diabetes. *Nat Med*. 2019 Dec;25(12):1865-1872. doi: 10.1038/s41591-019-0667-0.
  19. Wilson RG, Anderson J, Shenton BK, White MD, Taylor RM, Proud G. Natural killer cells in insulin dependent diabetes mellitus. *Br Med J (Clin Res Ed)*. 1986 Jul 26;293(6541):244. doi: 10.1136/bmj.293.6541.244.
  20. Fitas AL, Martins C, Borrego LM, Lopes L, Jörns A, Lenzen S, Limbert C. Immune cell and cytokine patterns in children with type 1 diabetes mellitus undergoing a remission phase: A longitudinal study. *Pediatr Diabetes*. 2018 Aug;19(5):963-971. doi: 10.1111/peidi.12671.
  21. Bates, D., Mächler, M., Bolker, B., Walker, S., 2015. Fitting Linear Mixed-Effects Models Using lme4. *J. Stat. Softw.* 67, 1–48. <https://doi.org/10.18637/jss.v067.i01>
  22. Knip, M., Virtanen, S.M., Seppä, K., Ilonen, J., Savilahti, E., Vaarala, O., Reunanen, A., Teramo, K., Hämäläinen, A.-M., Paronen, J., Dosch, H.-M., Hakulinen, T., Akerblom, H.K., Finnish TRIGR Study Group, 2010. Dietary intervention in infancy and later signs of beta-cell autoimmunity. *N. Engl. J. Med.* 363, 1900–1908. <https://doi.org/10.1056/NEJMoa1004809>
  23. Bhosale, S.D., Moulder, R., Kouvonon, P., Lahesmaa, R., Goodlett, D.R., 2017. Mass Spectrometry-Based Serum Proteomics for Biomarker Discovery and Validation. *Methods Mol. Biol.* Clifton NJ 1619, 451–466. [https://doi.org/10.1007/978-1-4939-7057-5\\_31](https://doi.org/10.1007/978-1-4939-7057-5_31)
  24. MacLean, B., Tomazela, D.M., Shulman, N., Chambers, M., Finney, G.L., Frewen, B., Kern, R., Tabb, D.L., Liebler, D.C., MacCoss, M.J., 2010. Skyline: an open source



- 898 document editor for creating and analyzing targeted proteomics experiments.  
899 Bioinforma. Oxf. Engl. 26, 966–968. <https://doi.org/10.1093/bioinformatics/btq054>
- 900 25. Bates, D., Mächler, M., Bolker, B., Walker, S., 2015. Fitting Linear Mixed-Effects  
901 Models Using lme4. *J. Stat. Softw.* 67, 1–48. <https://doi.org/10.18637/jss.v067.i01>
- 902 26. Orešič M, Anderson G, Mattila I, Manoucheri M, Soininen H, Hyötyläinen T,  
903 Basignani C. Targeted Serum Metabolite Profiling Identifies Metabolic Signatures in  
904 Patients with Alzheimer's Disease, Normal Pressure Hydrocephalus and Brain Tumor.  
905 *Front Neurosci.* 2018 Jan 9;11:747. doi: 10.3389/fnins.2017.00747. PMID: 29375291;  
906 PMID: PMC5767271.
- 907 27. Gika, H.G., Theodoridis, G.A., Plumb, R.S., Wilson, I.D., 2014. Current practice of  
908 liquid chromatography–mass spectrometry in metabolomics and metabonomics. *J.*  
909 *Pharm. Biomed. Anal., Review Papers on Pharmaceutical and Biomedical Analysis*  
910 2013 87, 12–25. <https://doi.org/10.1016/j.jpba.2013.06.032>
- 911 28. Folch, J., Lees, M., Sloane Stanley, G.H., 1957. A simple method for the isolation and  
912 purification of total lipides from animal tissues. *J. Biol. Chem.* 226, 497–509.
- 913 29. O’Gorman, A., Suvitaival, T., Ahonen, L., Cannon, M., Zammit, S., Lewis, G.,  
914 Roche, H.M., Mattila, I., Hyotylainen, T., Oresic, M., Brennan, L., Cotter, D.R., 2017.  
915 Identification of a plasma signature of psychotic disorder in children and adolescents  
916 from the Avon Longitudinal Study of Parents and Children (ALSPAC) cohort. *Transl.*  
917 *Psychiatry* 7, e1240. <https://doi.org/10.1038/tp.2017.211>
- 918 30. Tofte, N., Suvitaival, T., Ahonen, L., Winther, S.A., Theilade, S., Frimodt-Møller, M.,  
919 Ahluwalia, T.S., Rossing, P., 2019. Lipidomic analysis reveals sphingomyelin and  
920 phosphatidylcholine species associated with renal impairment and all-cause mortality  
921 in type 1 diabetes. *Sci. Rep.* 9, 16398. <https://doi.org/10.1038/s41598-019-52916-w>
- 922 31. Love, M.I., Huber, W., Anders, S., 2014. Moderated estimation of fold change and  
923 dispersion for RNA-seq data with DESeq2. *Genome Biol.* 15, 550.  
924 <https://doi.org/10.1186/s13059-014-0550-8>
- 925 32. Argelaguet, R., Velten, B., Arnol, D., Dietrich, S., Zenz, T., Marioni, J.C., Buettner,  
926 F., Huber, W., Stegle, O., 2018. Multi-Omics Factor Analysis—a framework for  
927 unsupervised integration of multi-omics data sets. *Mol. Syst. Biol.* 14:e8124.  
928 <https://doi.org/10.15252/msb.20178124>
- 929 33. Subramanian, A., Tamayo, P., Mootha, V.K., Mukherjee, S., Ebert, B.L., Gillette,  
930 M.A., Paulovich, A., Pomeroy, S.L., Golub, T.R., Lander, E.S., Mesirov, J.P., 2005.  
931 Gene set enrichment analysis: A knowledge-based approach for interpreting genome-  
932 wide expression profiles. *Proc. Natl. Acad. Sci.* 102, 15545–15550.  
933 <https://doi.org/10.1073/pnas.0506580102>
- 934 34. Frost, H.R., Li, Z., Moore, J.H., 2015. Principal component gene set enrichment  
935 (PCGSE). *BioData Min.* 8, 25. <https://doi.org/10.1186/s13040-015-0059-z>
- 936 35. Szklarczyk, D., Gable, A.L., Nastou, K.C., Lyon, D., Kirsch, R., Pyysalo, S.,  
937 Doncheva, N.T., Legeay, M., Fang, T., Bork, P., Jensen, L.J., von Mering, C., 2021.  
938 The STRING database in 2021: customizable protein-protein networks, and functional  
939 characterization of user-uploaded gene/measurement sets. *Nucleic Acids Res.* 49,  
940 D605–D612. <https://doi.org/10.1093/nar/gkaa1074>
- 941 36. Huang, J., Xiao, Y., Xu, A., Zhou, Z., 2016. Neutrophils in type 1 diabetes. *J.*  
942 *Diabetes Investig.* 7, 652–663. <https://doi.org/10.1111/jdi.12469>
- 943  
944

# Cohort data collection

**A**

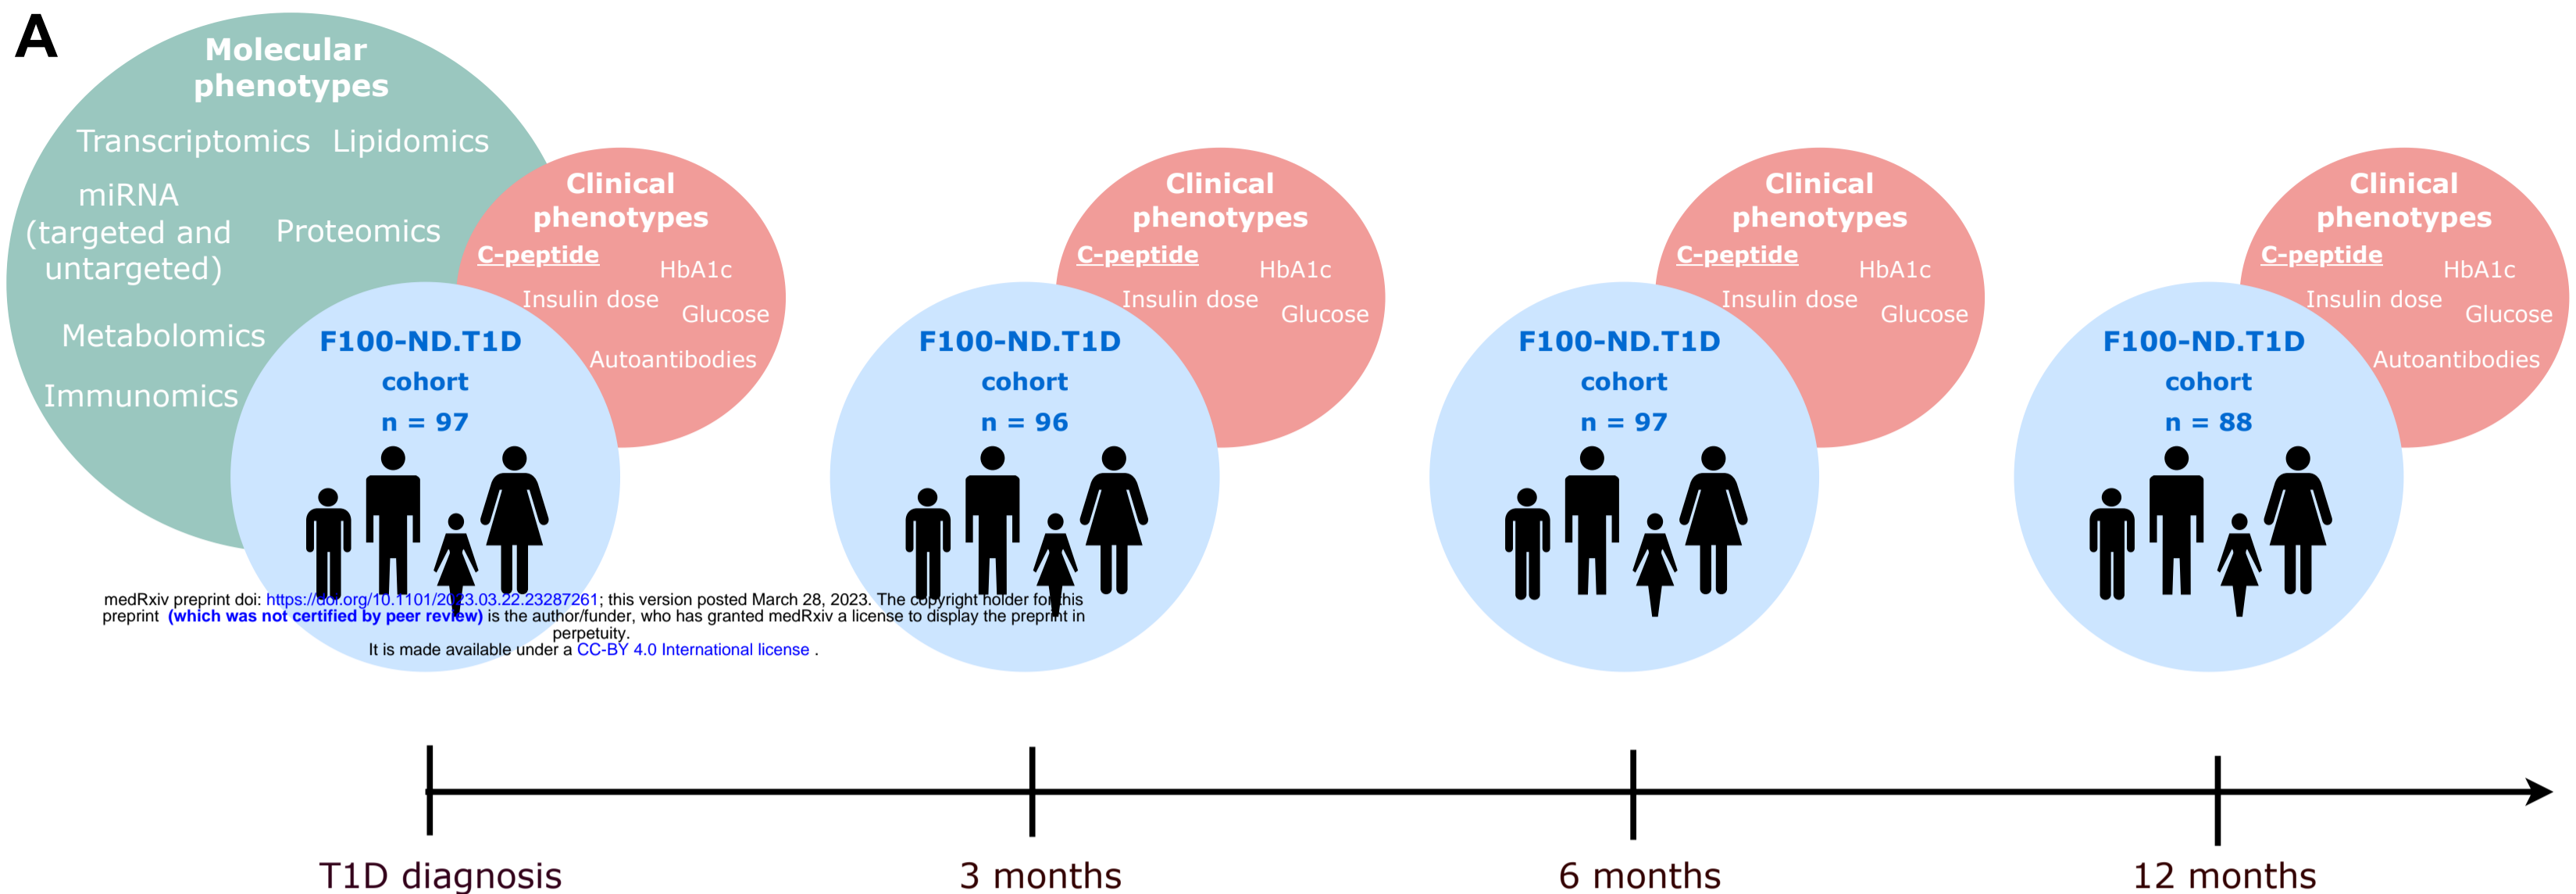

**B**

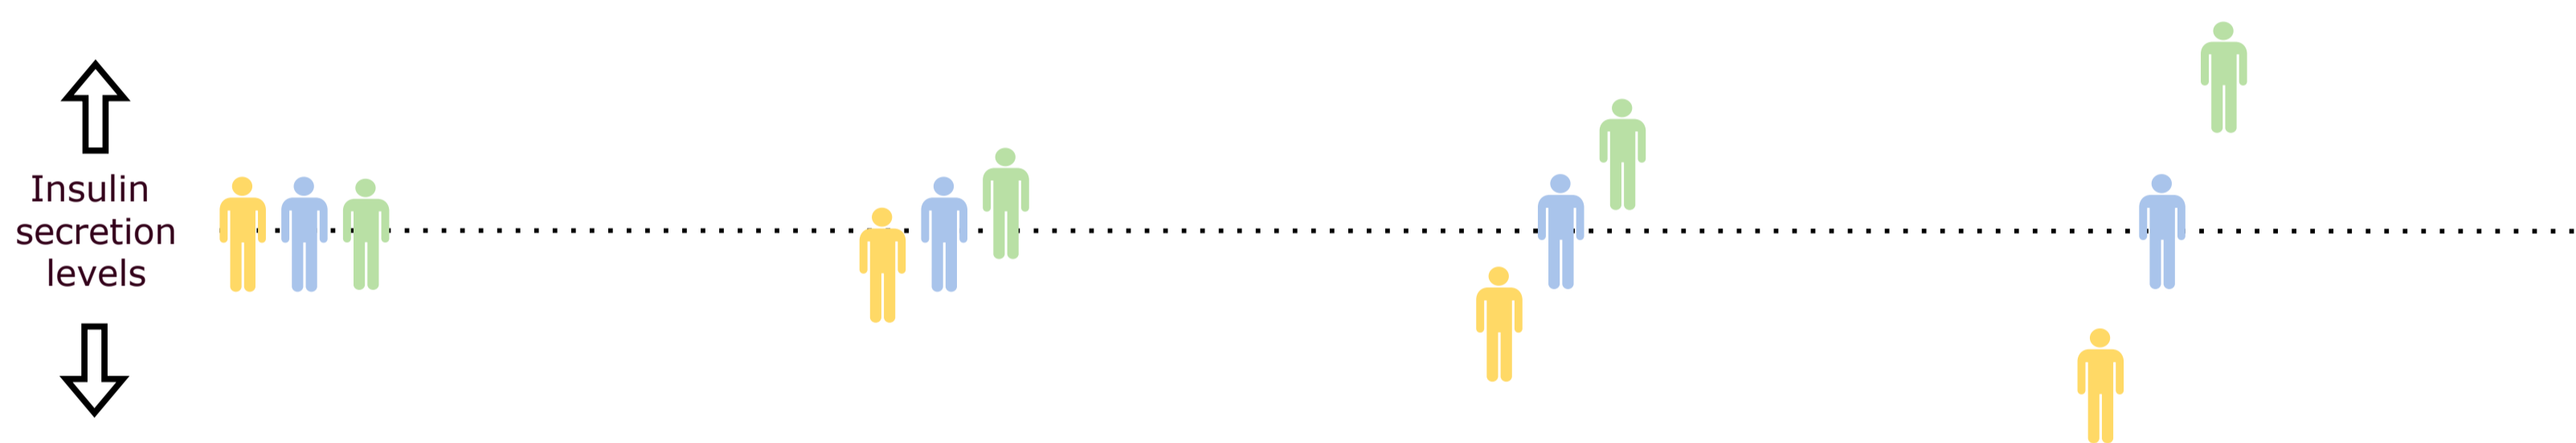

**C**

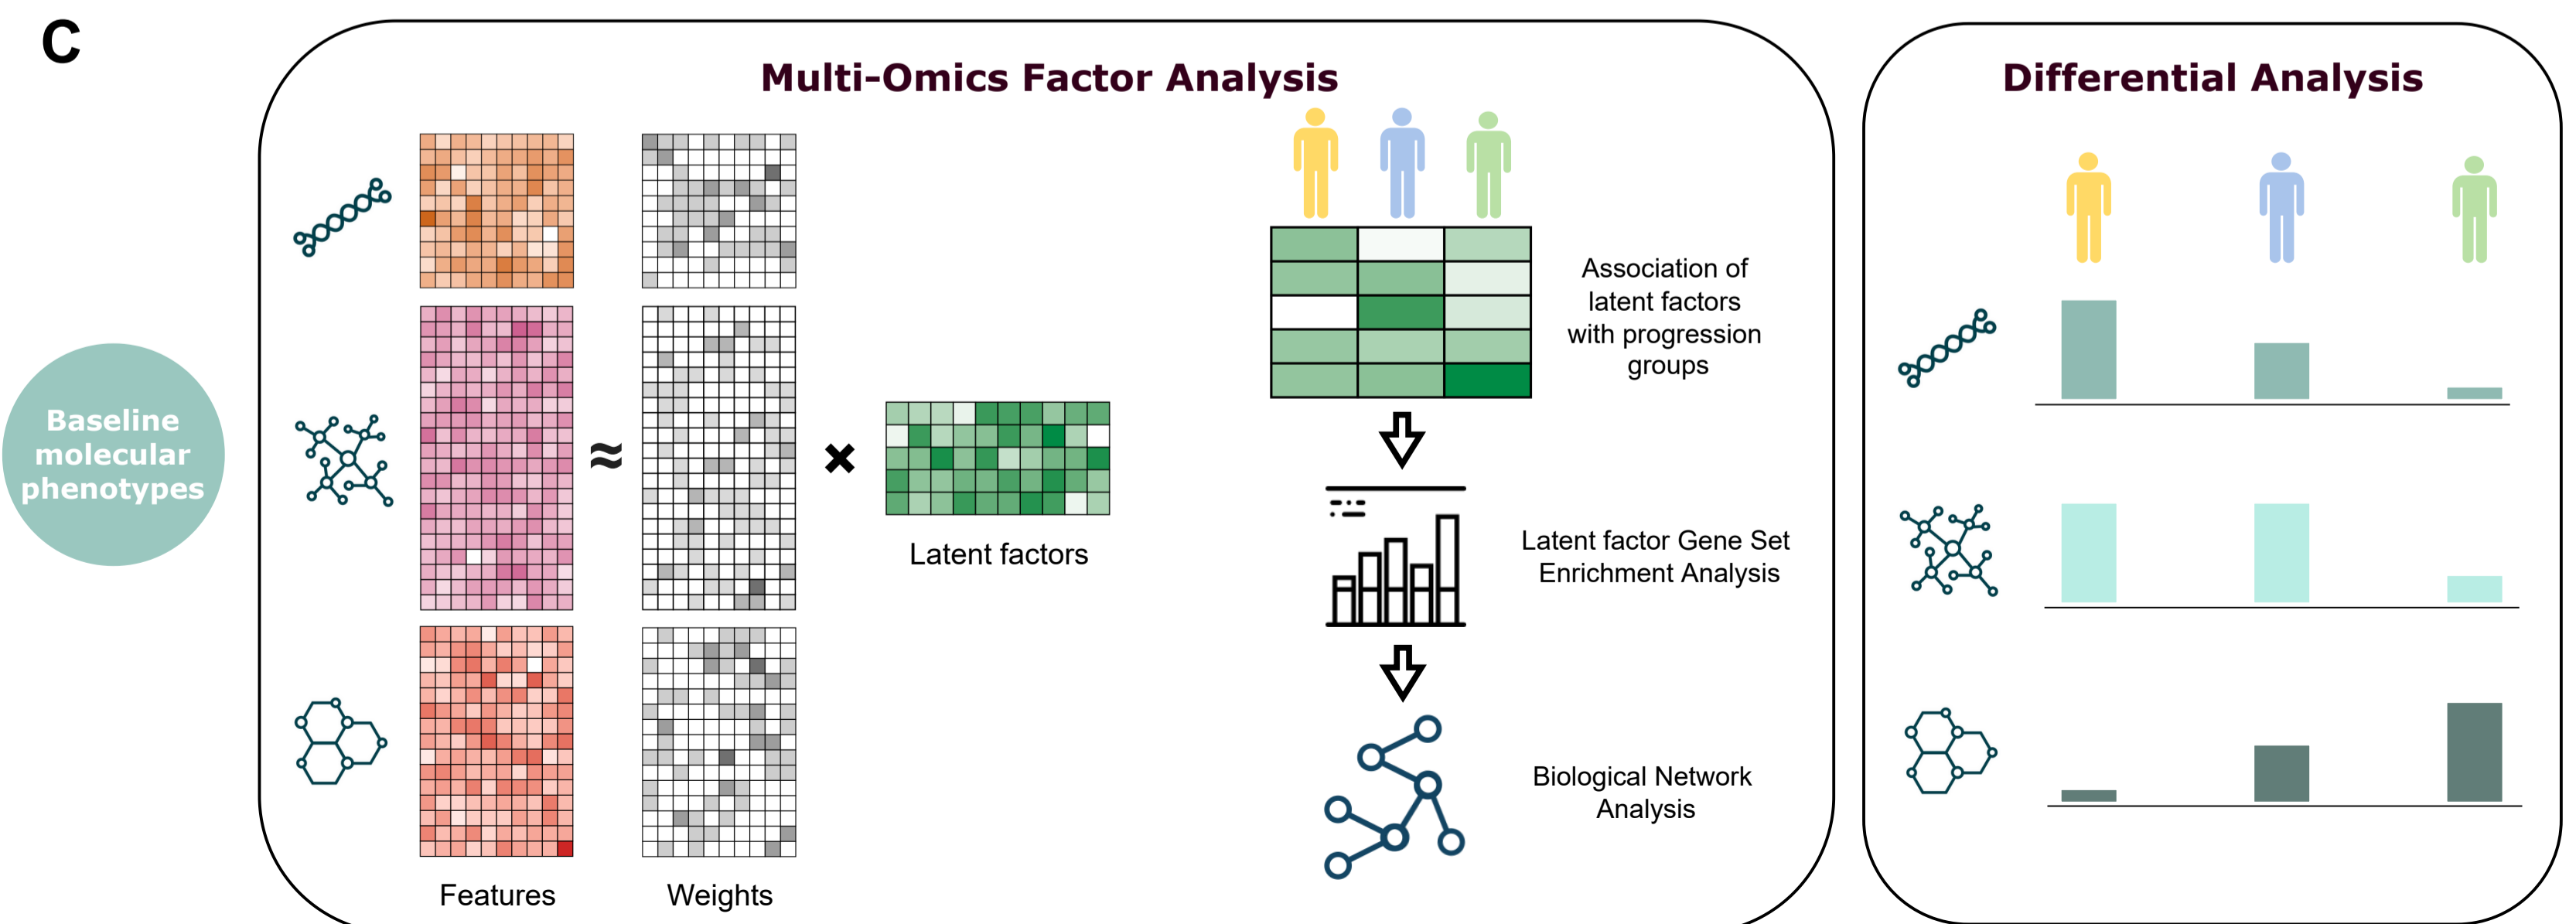

Progression groups Rapid Slow Increasing

Age Intervals <10 >10-18 >18

Sex Female Male

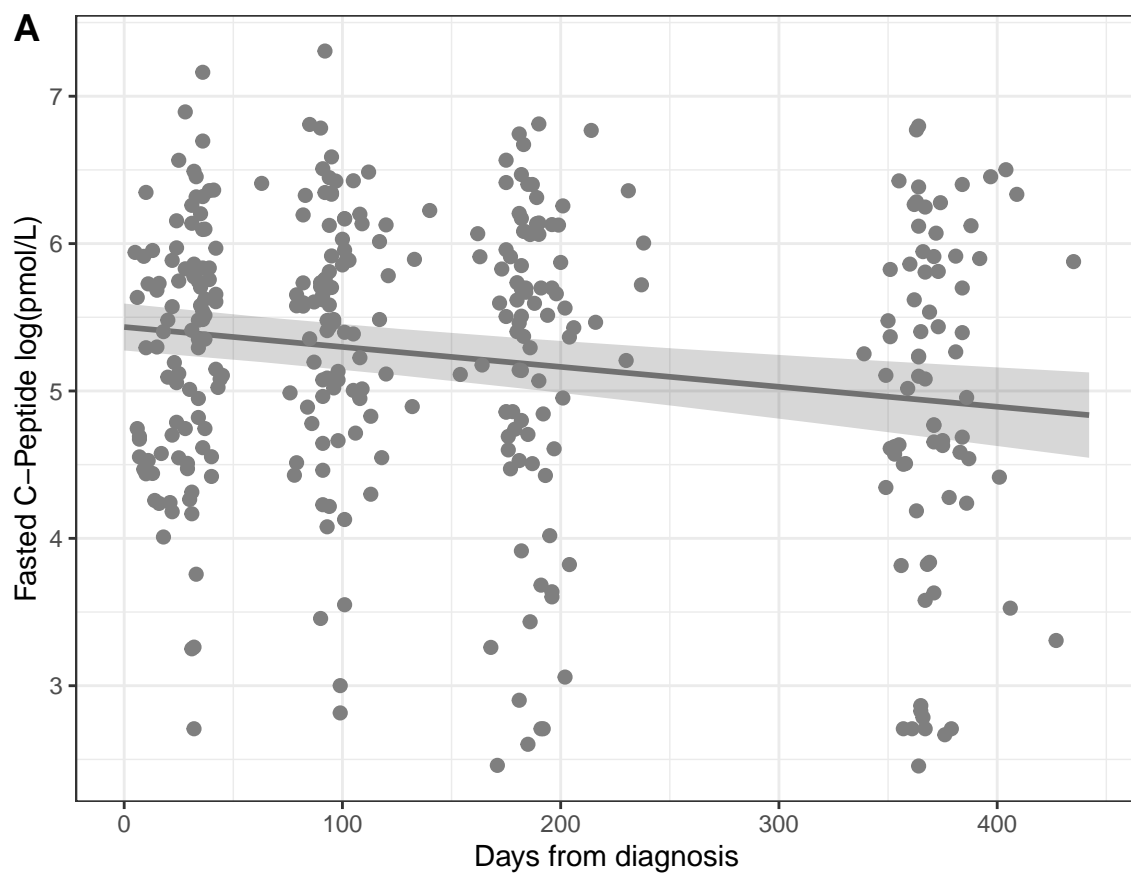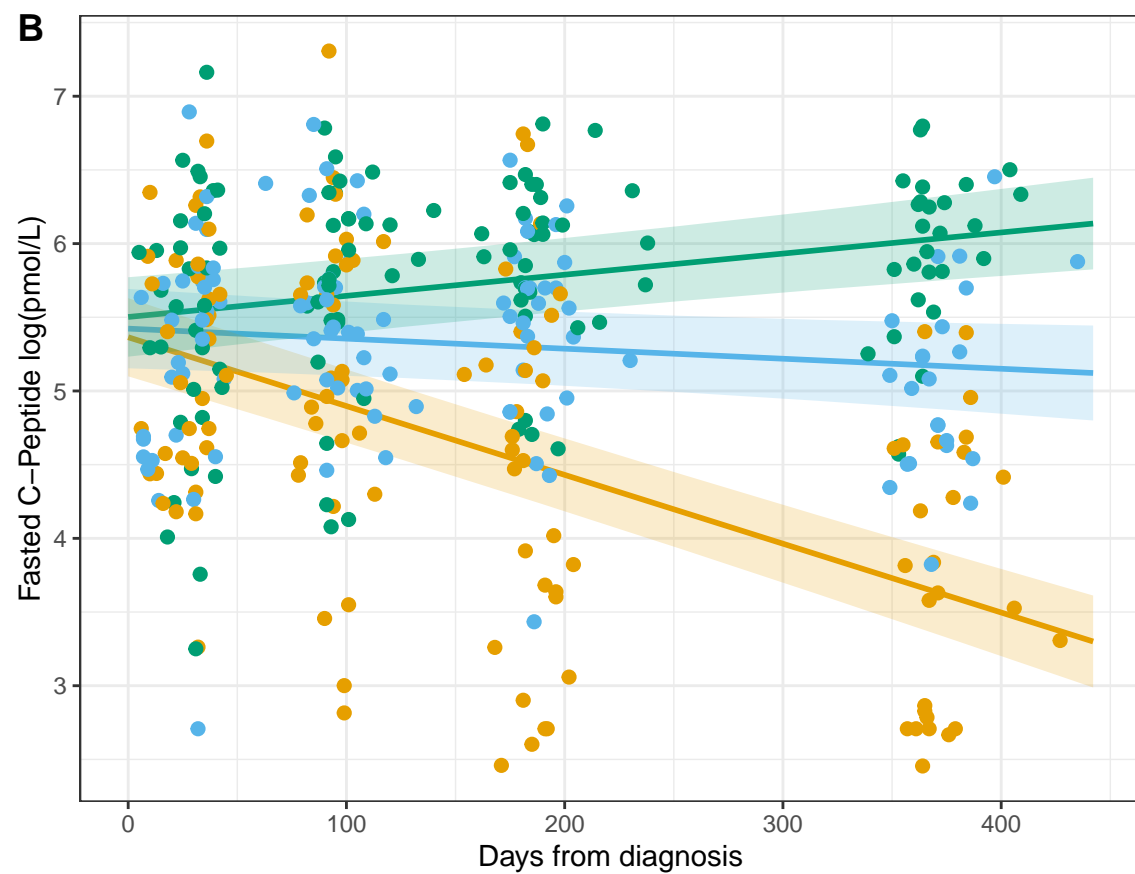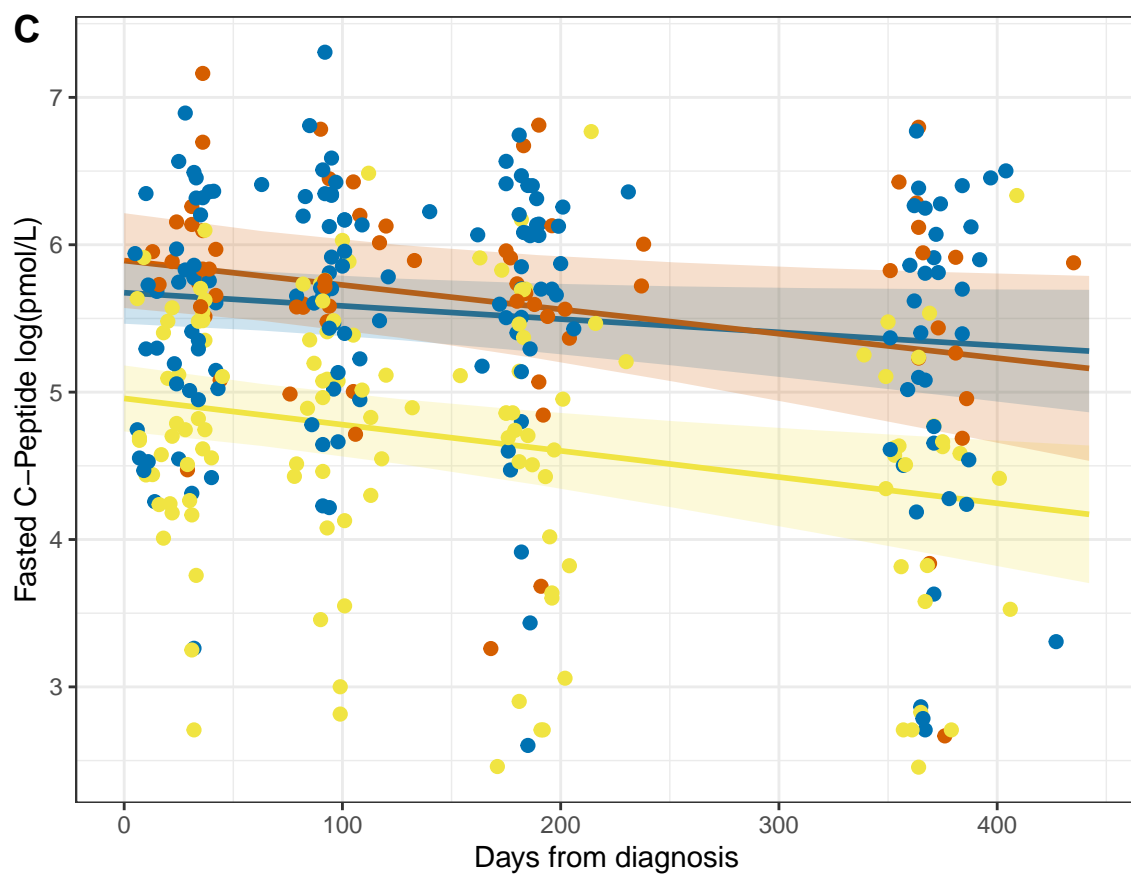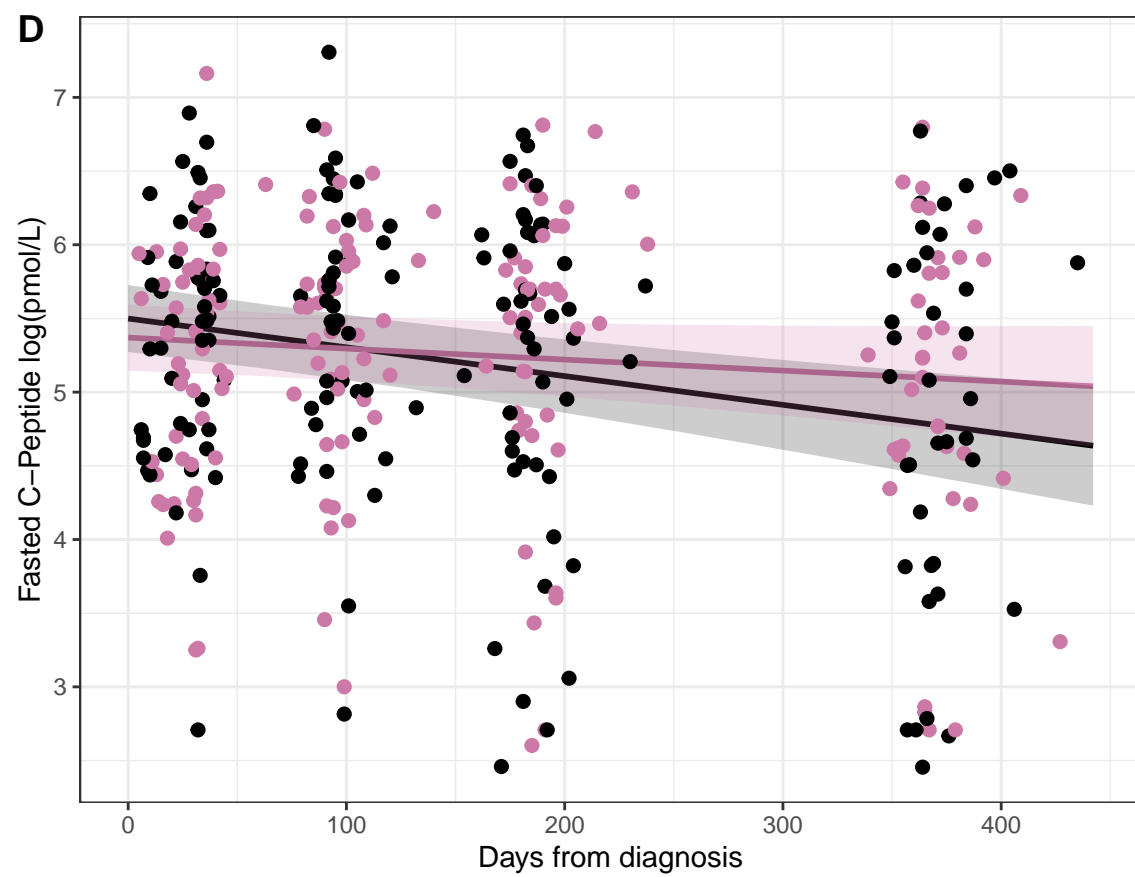

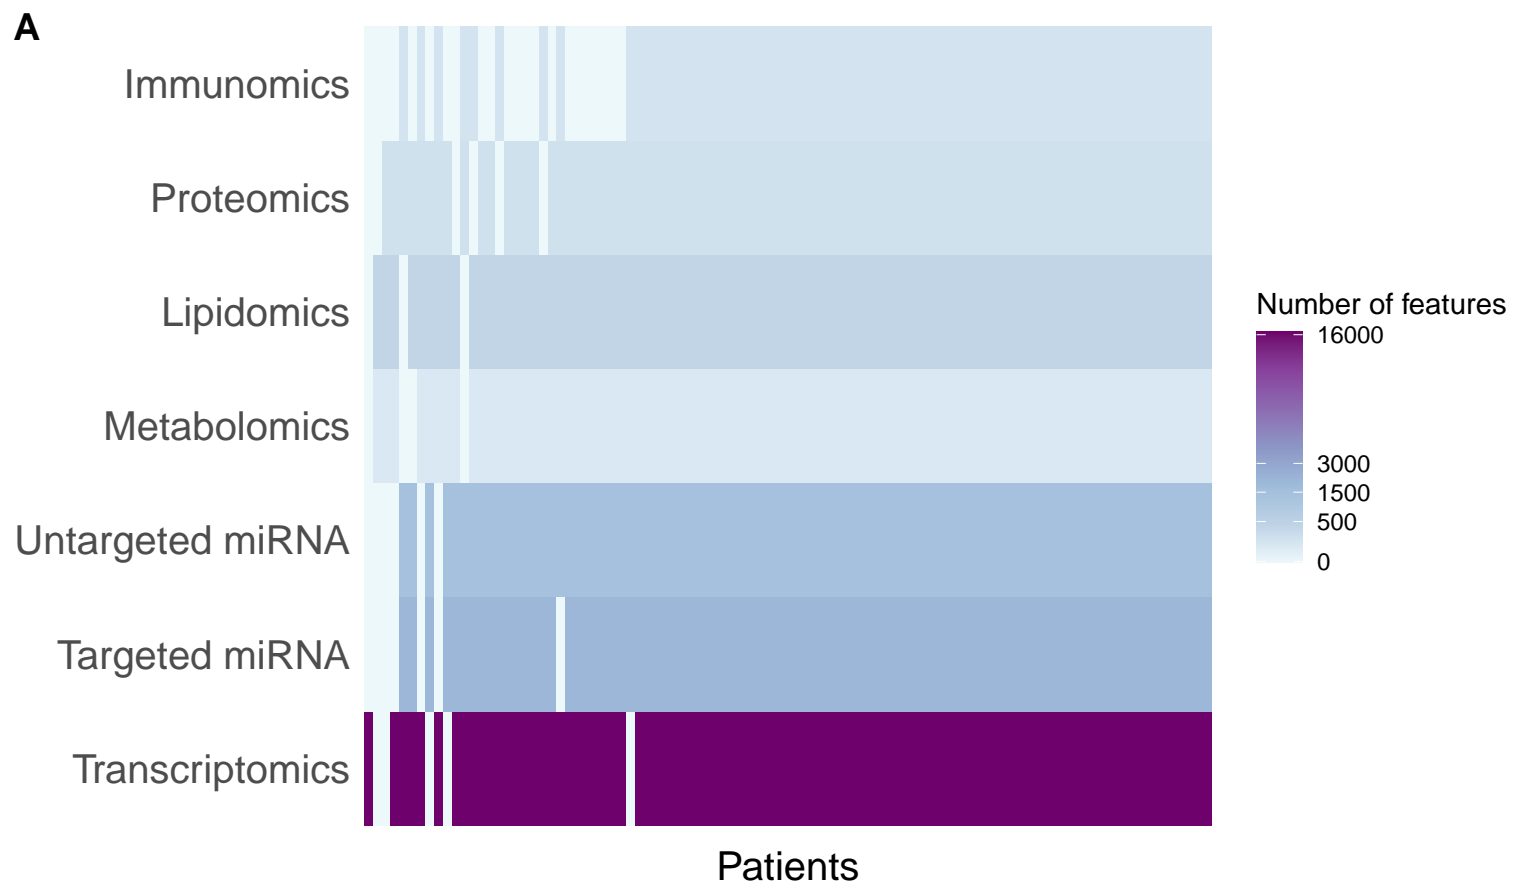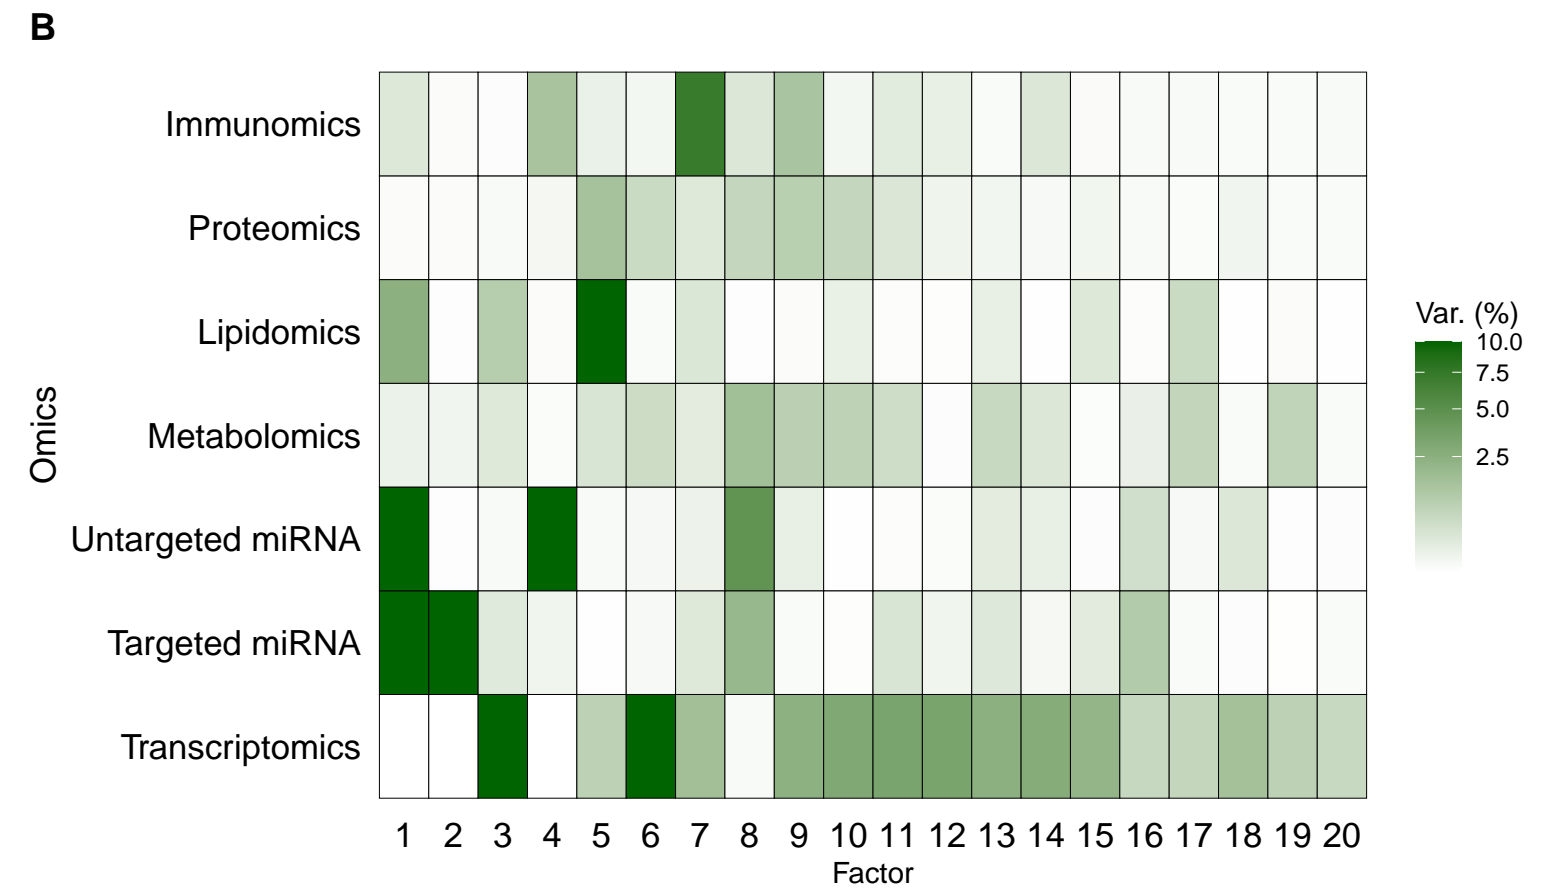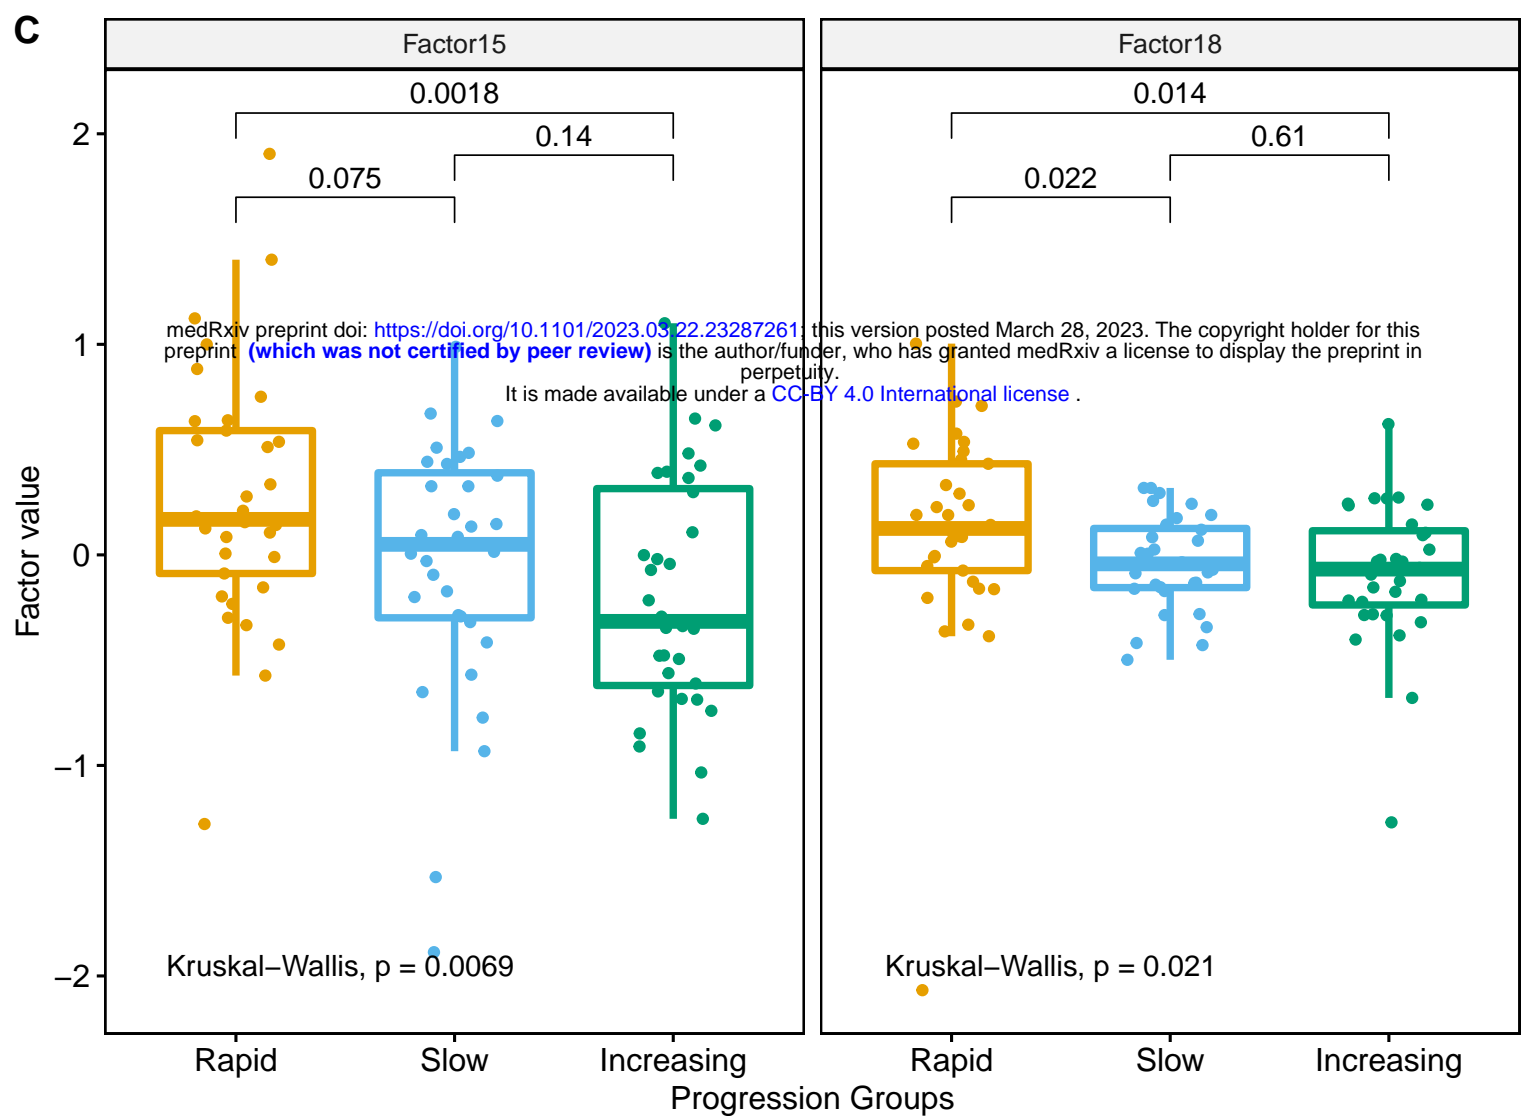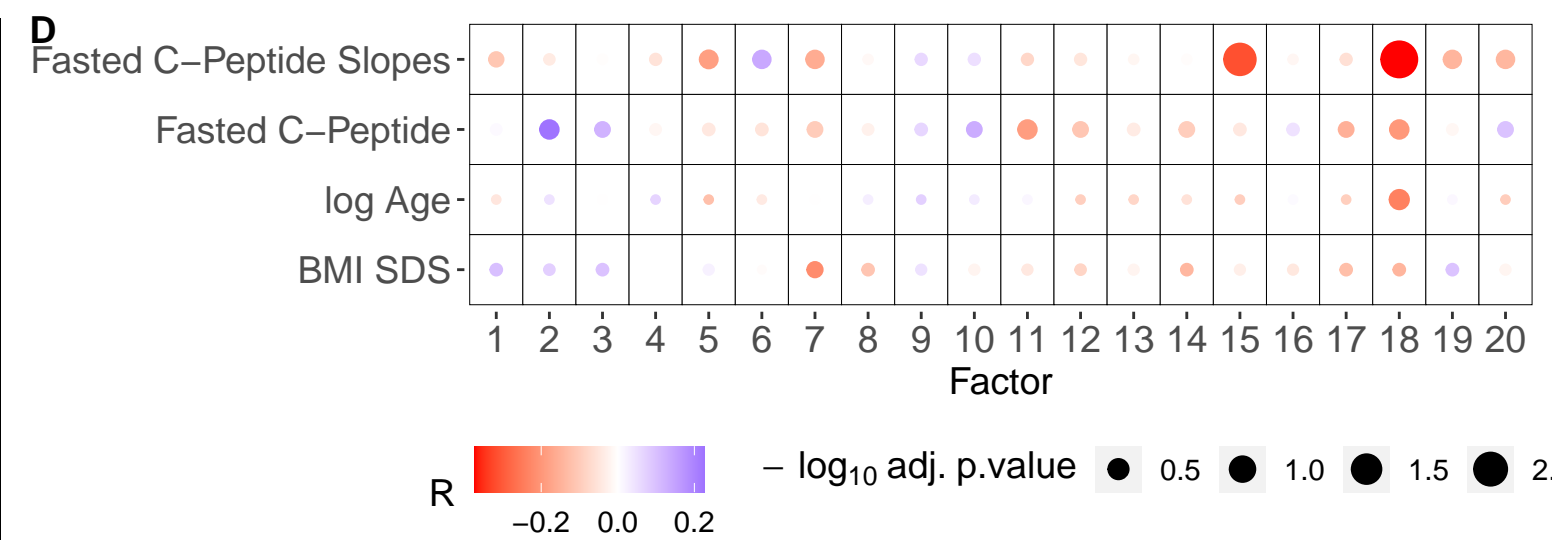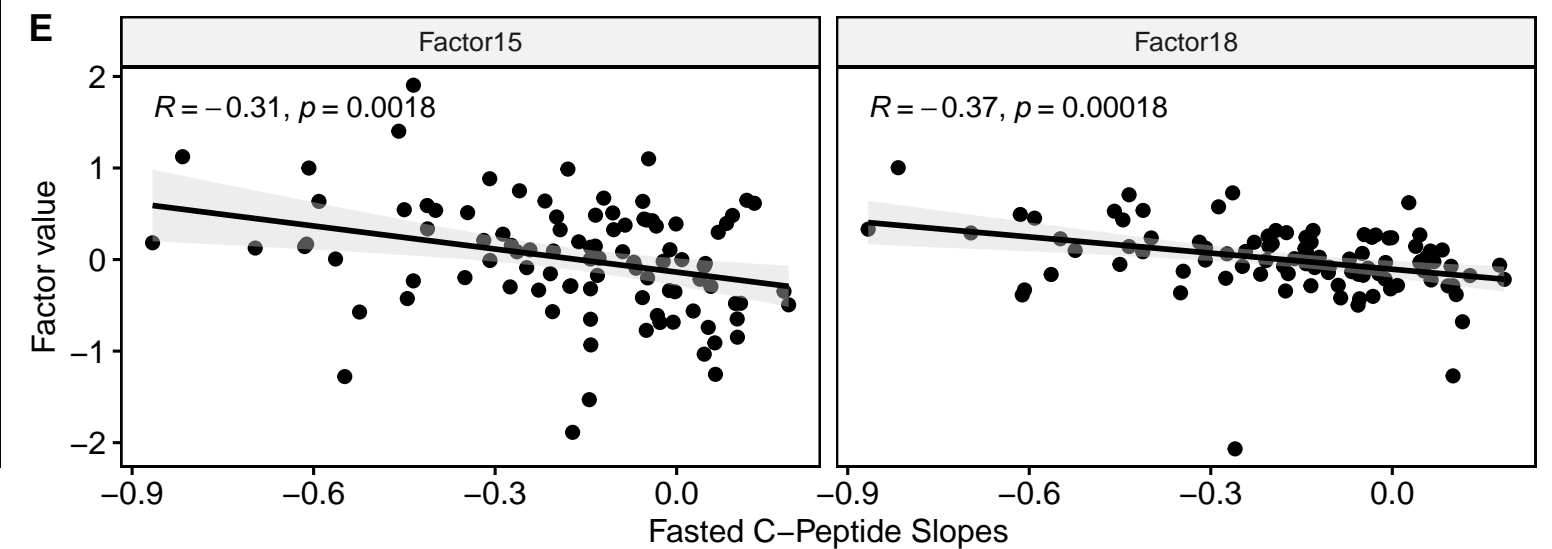

**A**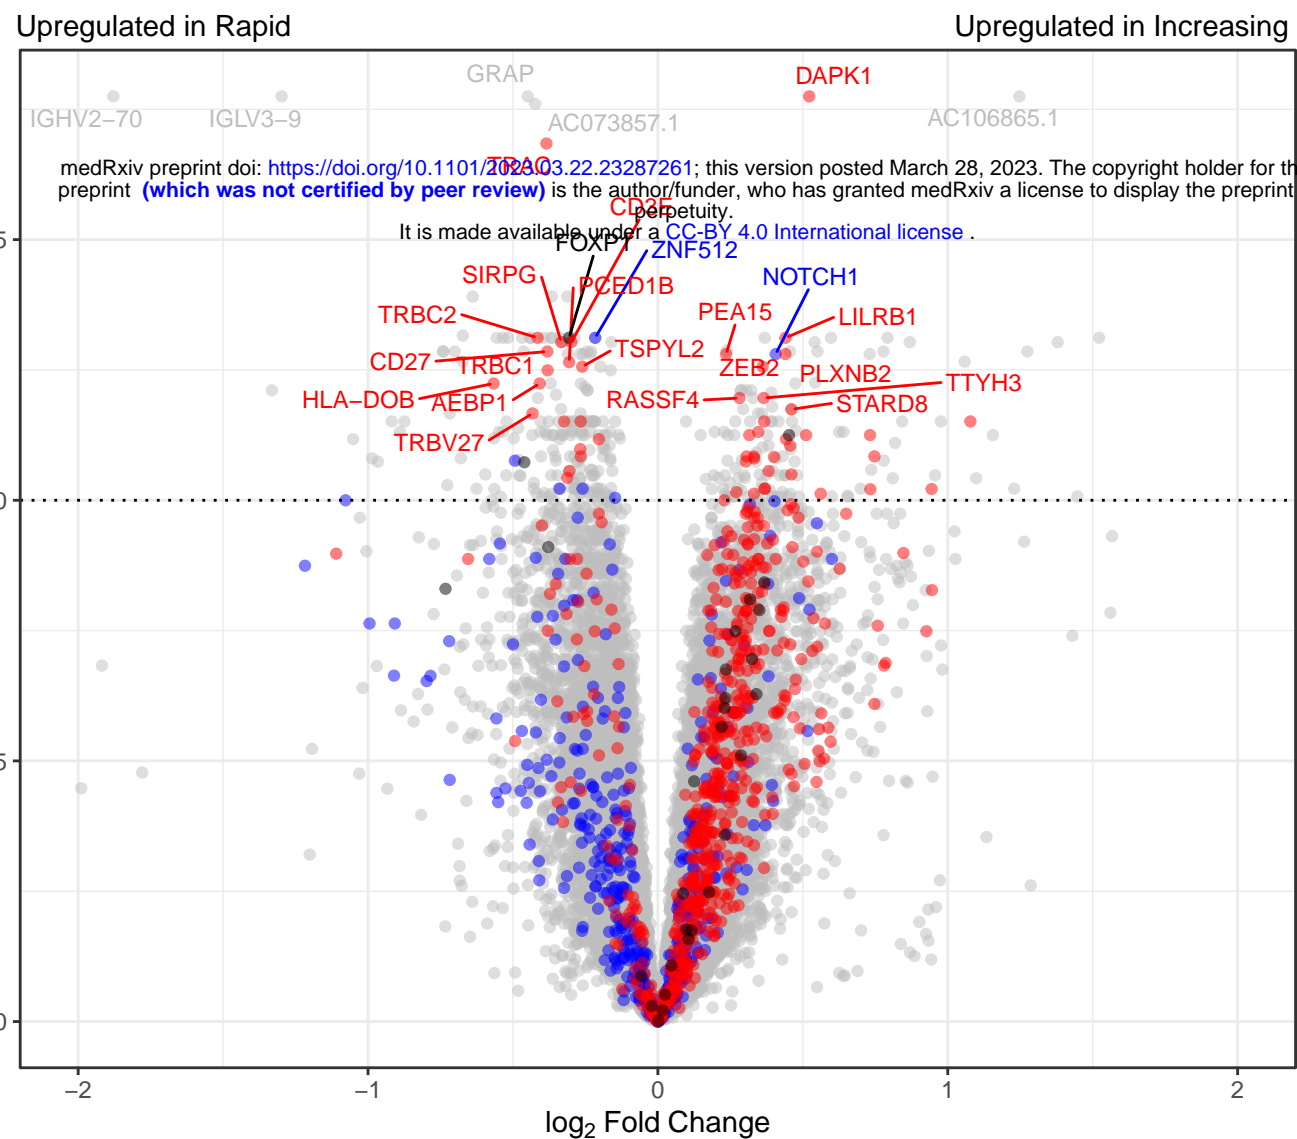**B**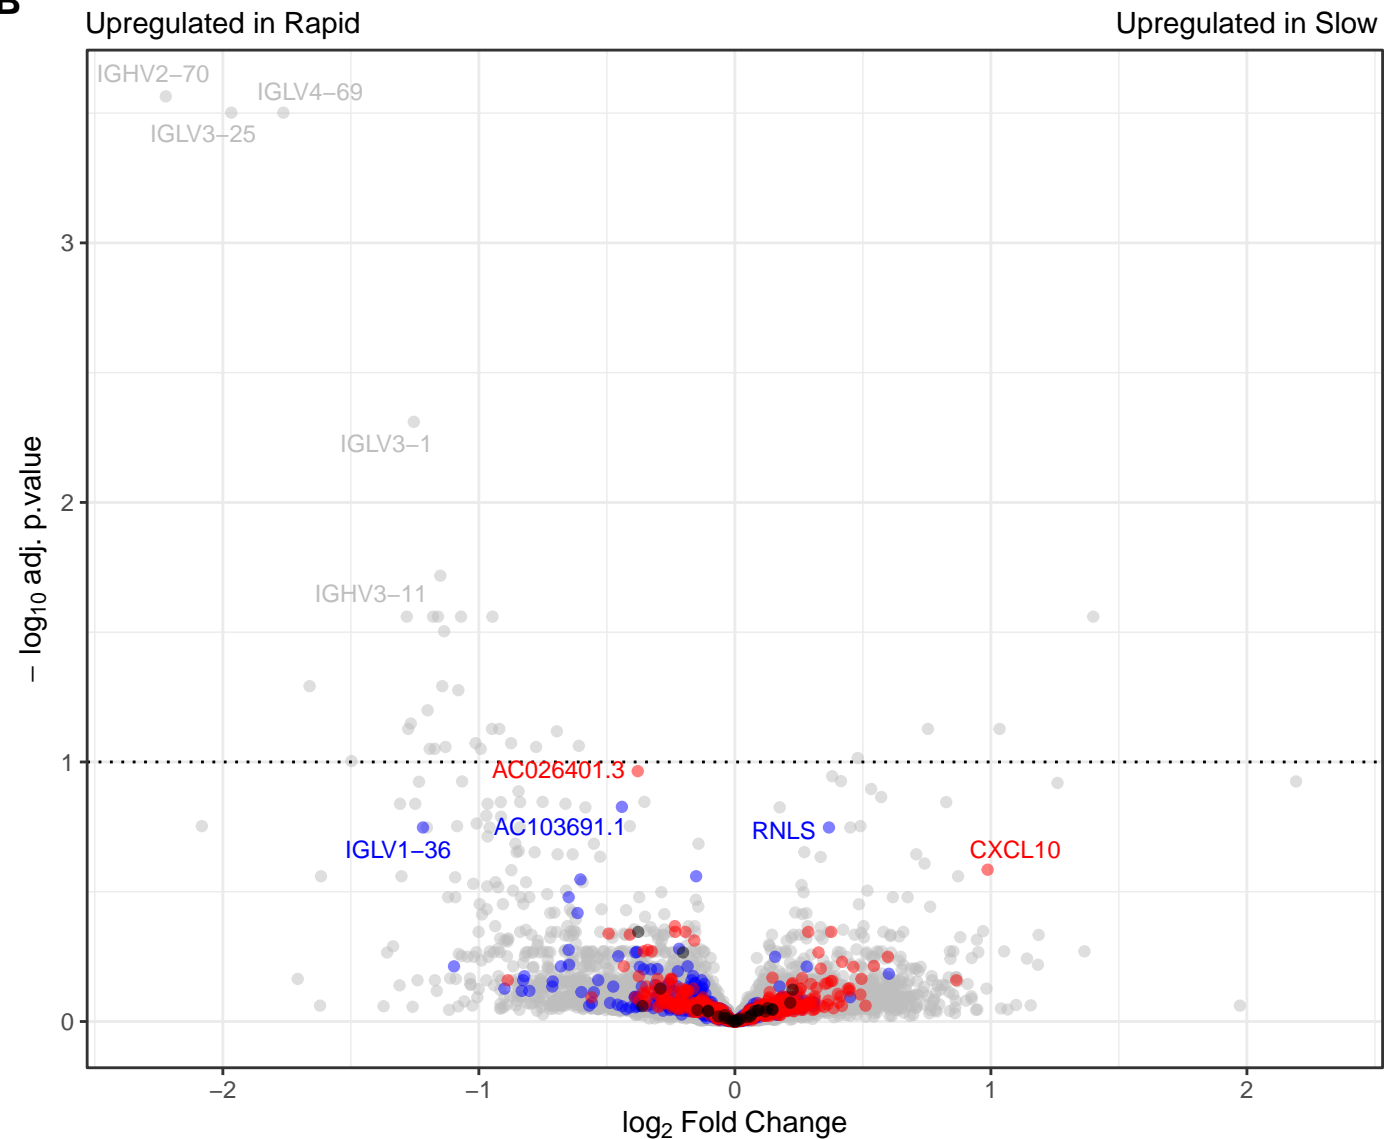**C**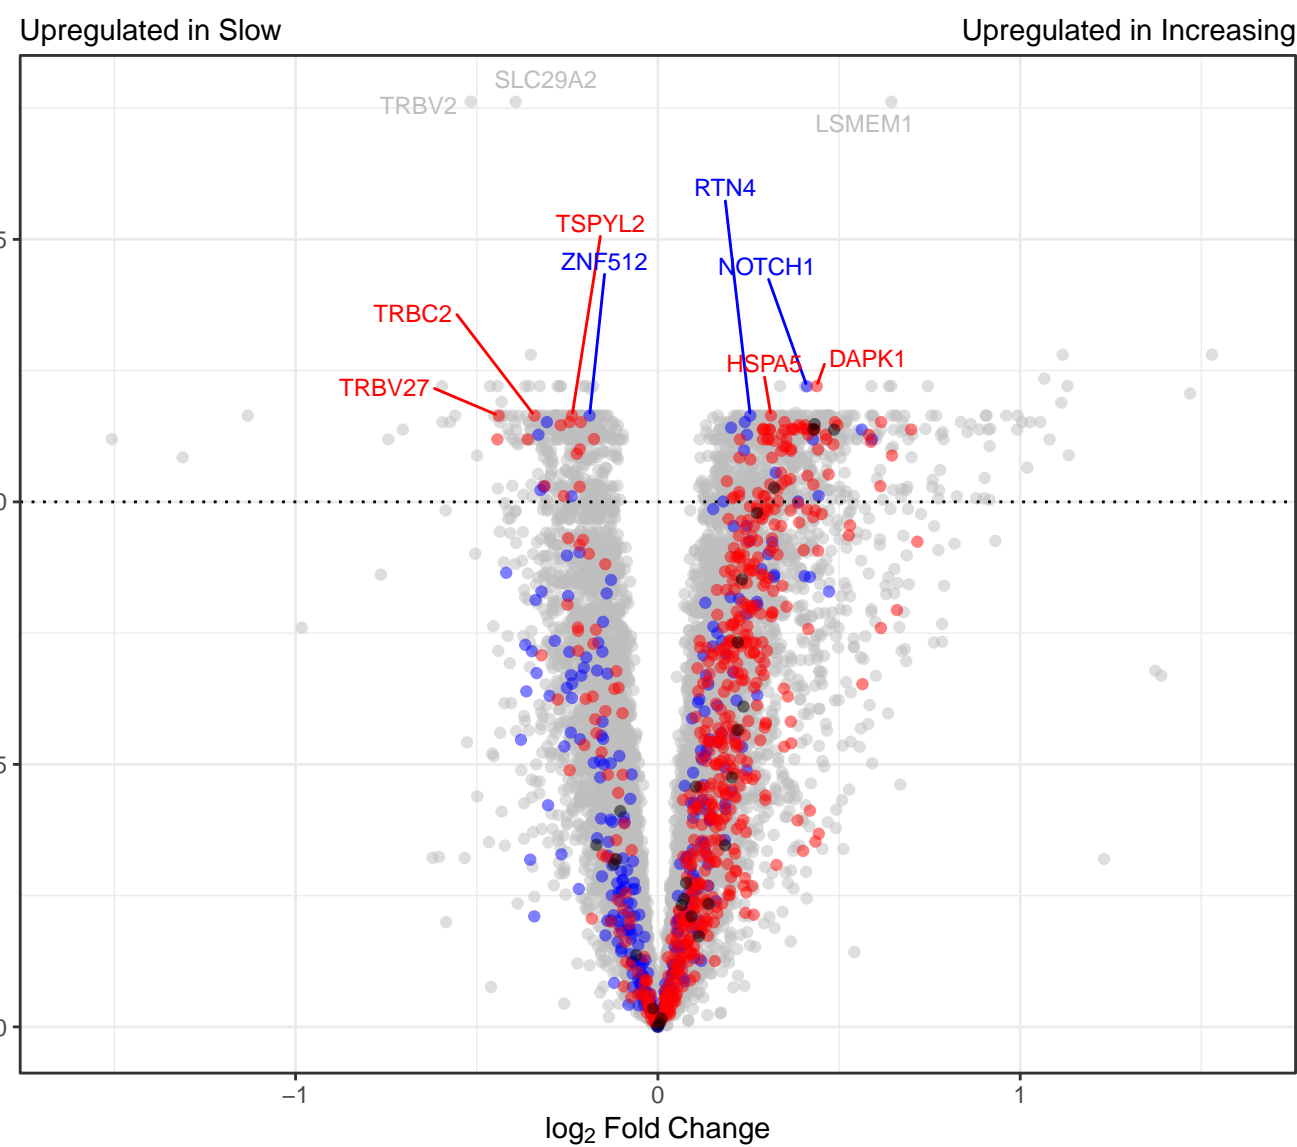**D**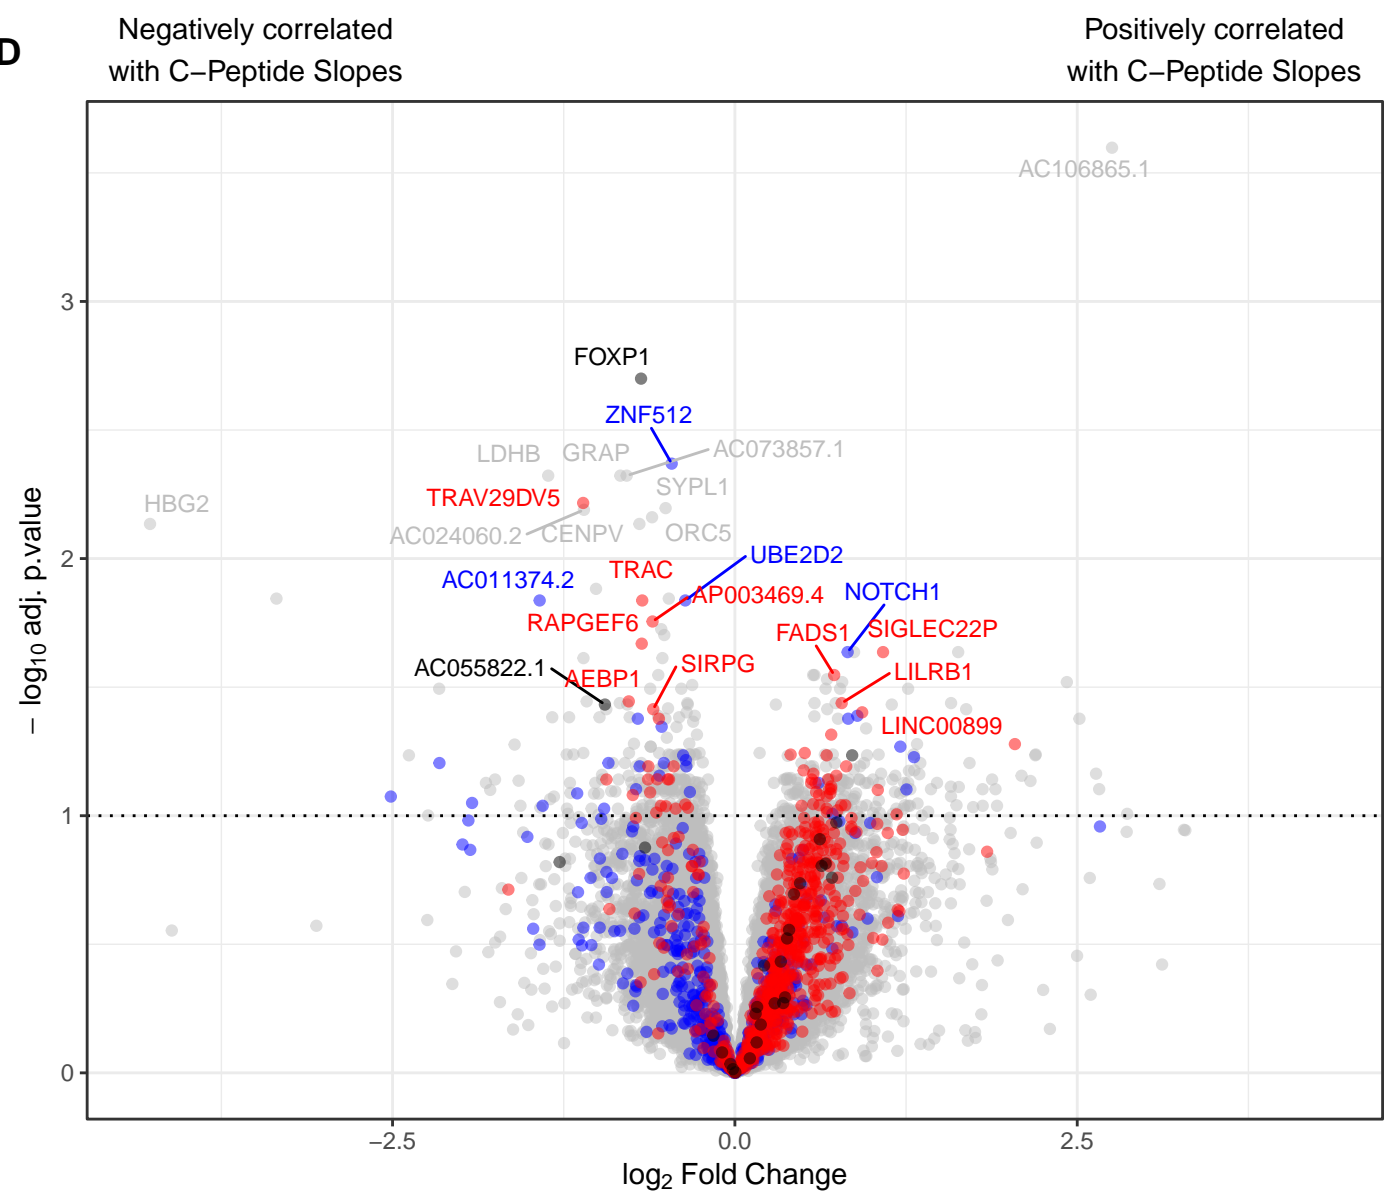



Pathways

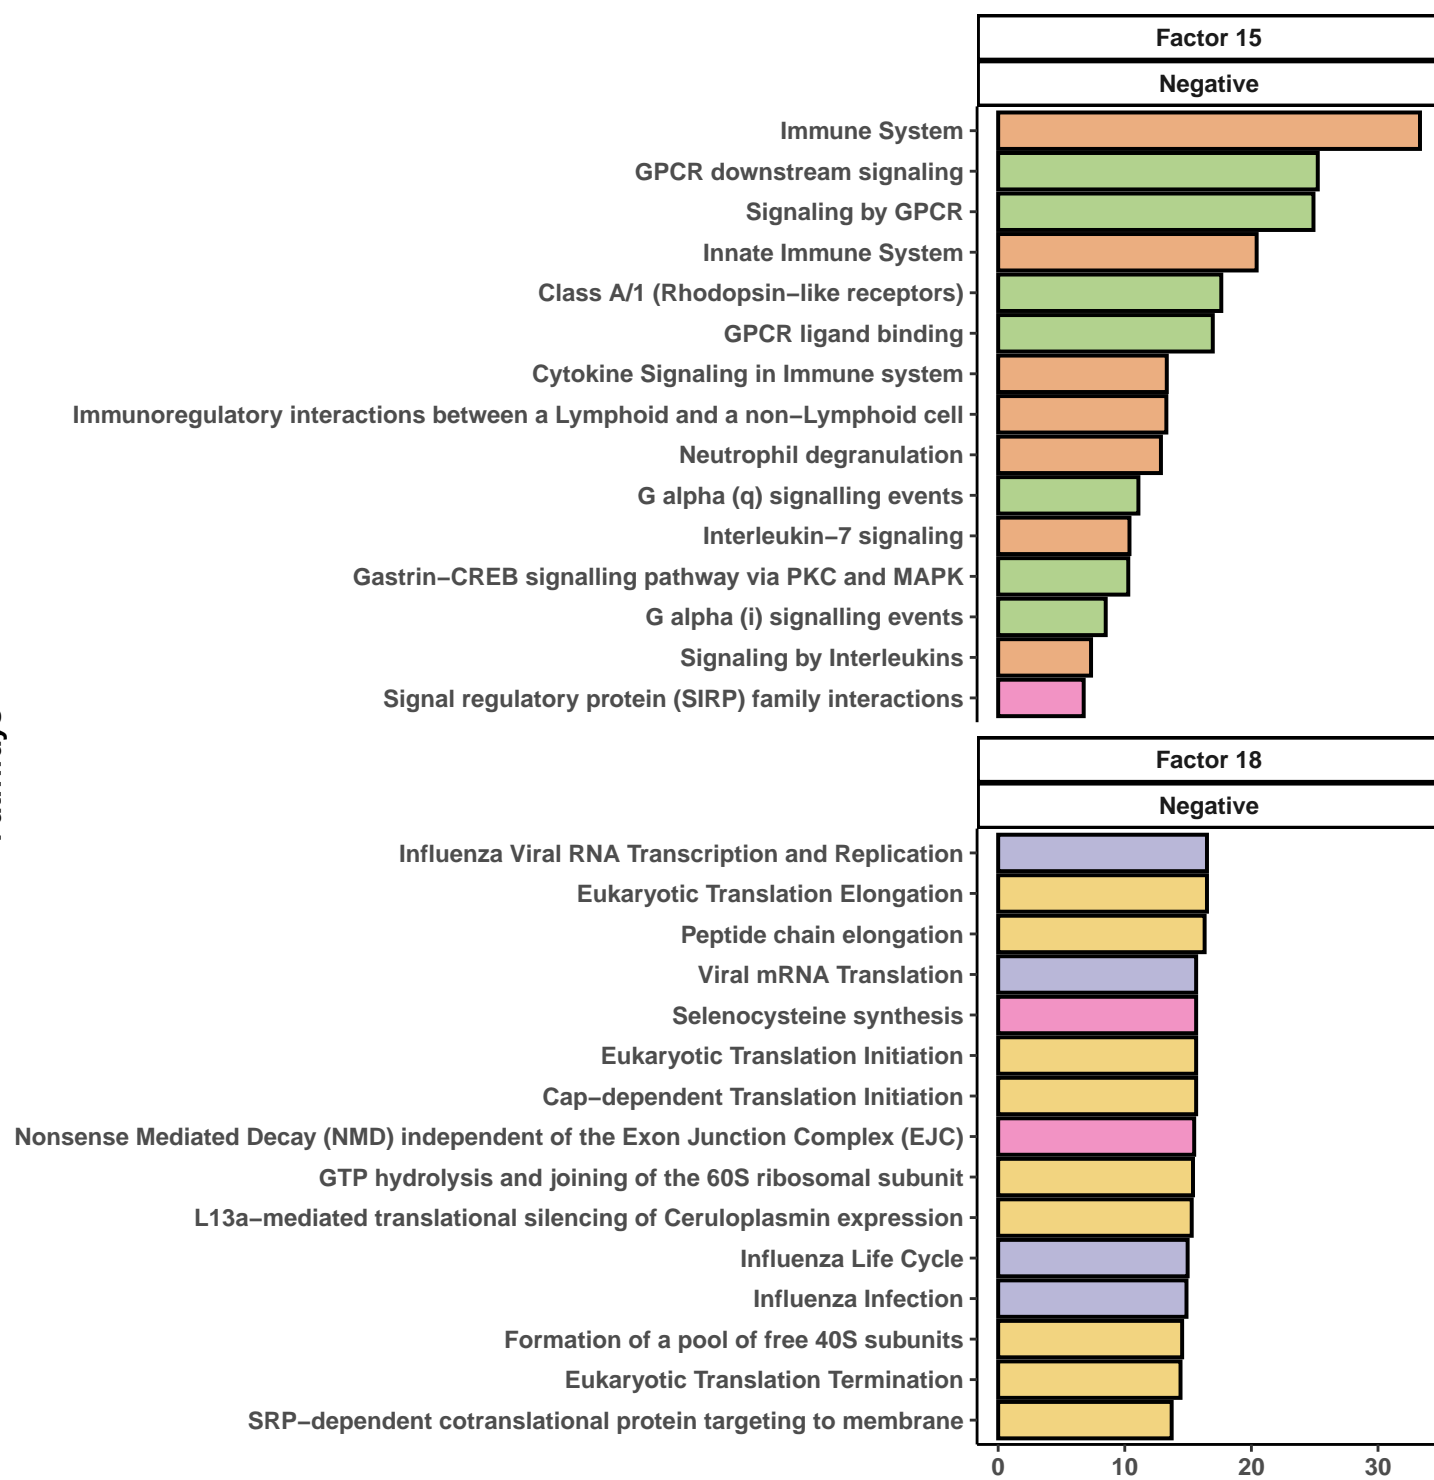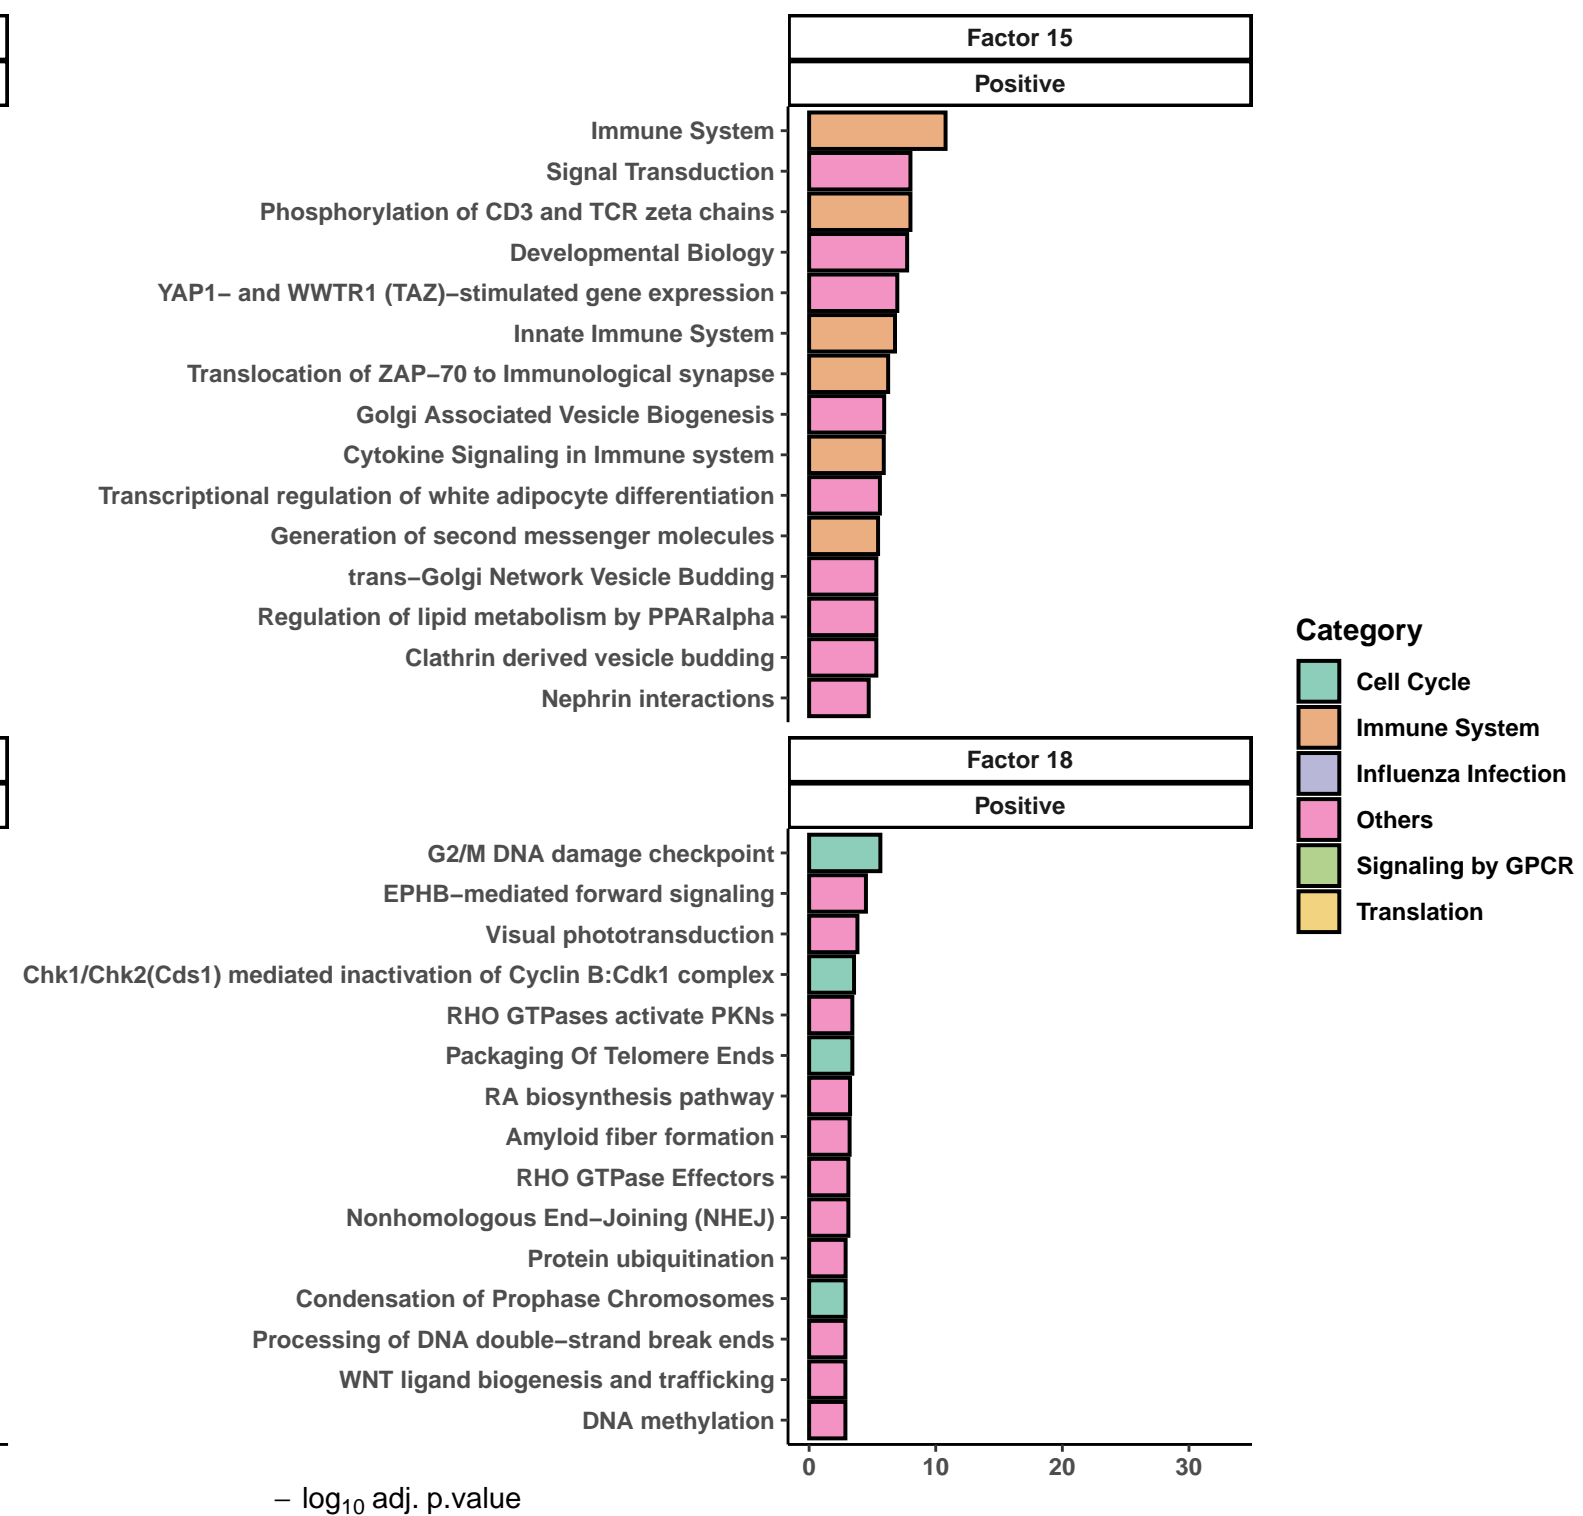

Category

- Cell Cycle
- Immune System
- Influenza Infection
- Others
- Signaling by GPCR
- Translation

$-\log_{10}$  adj. p.value

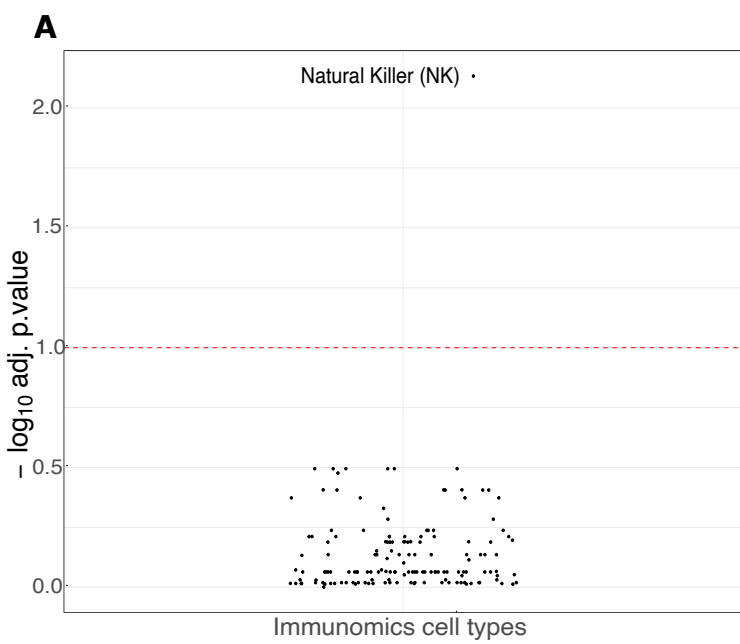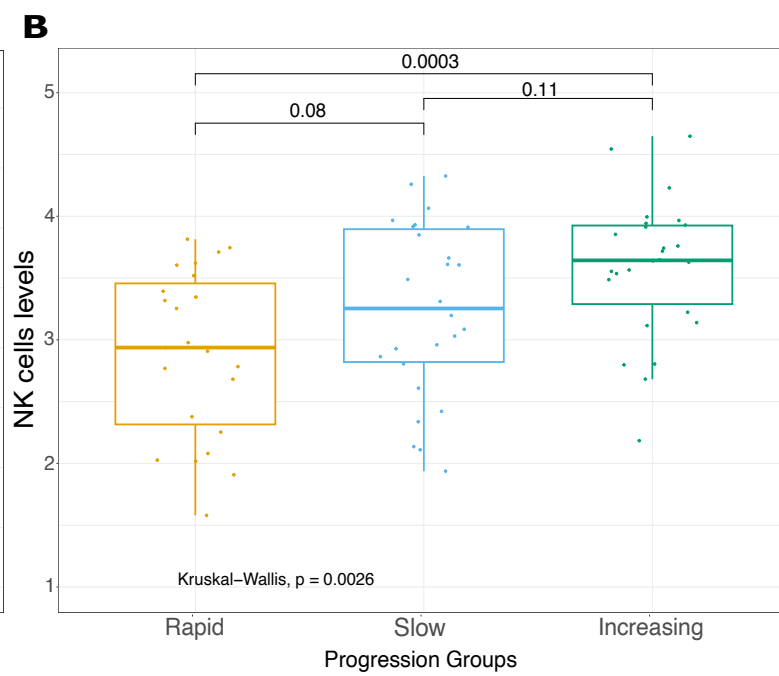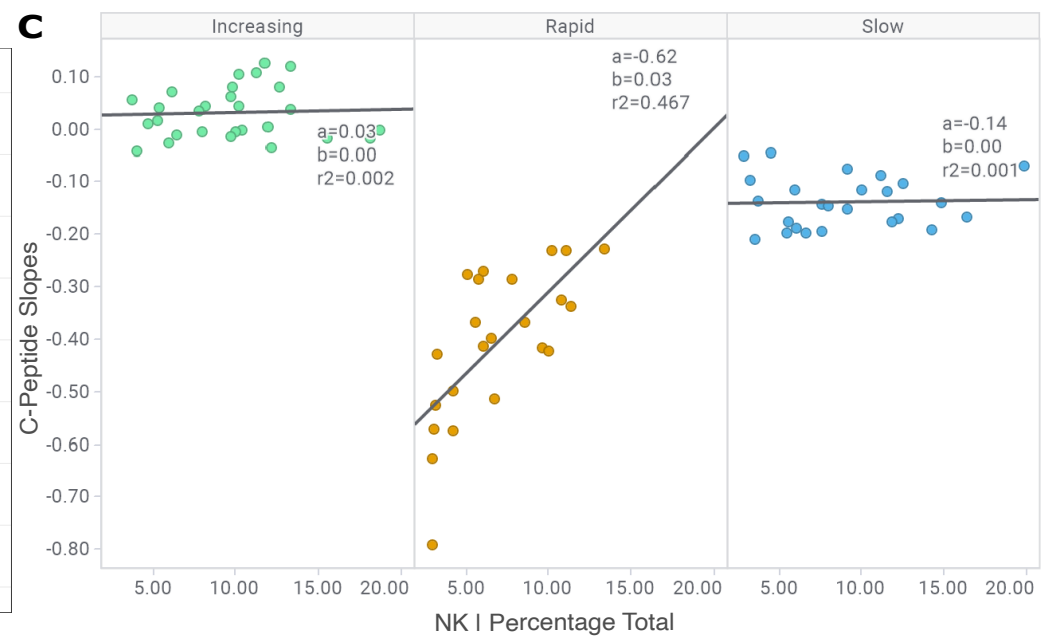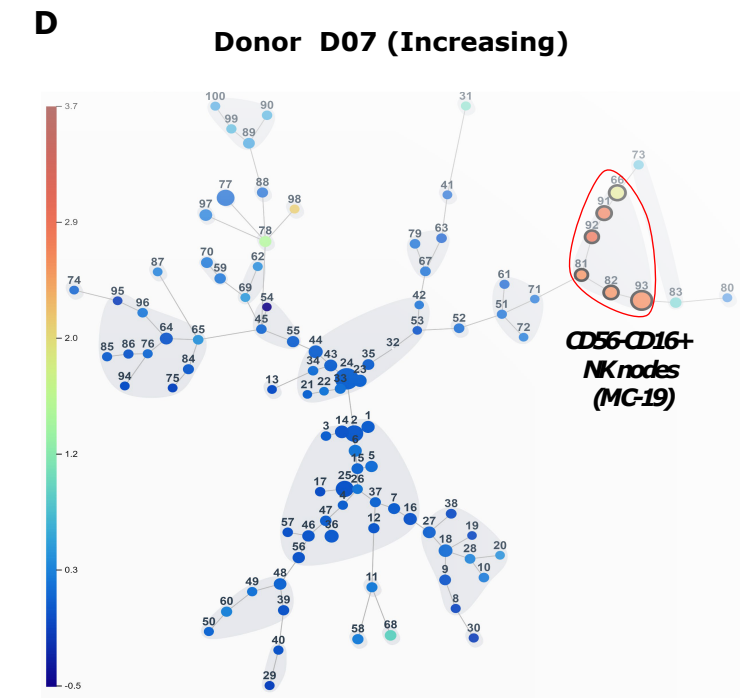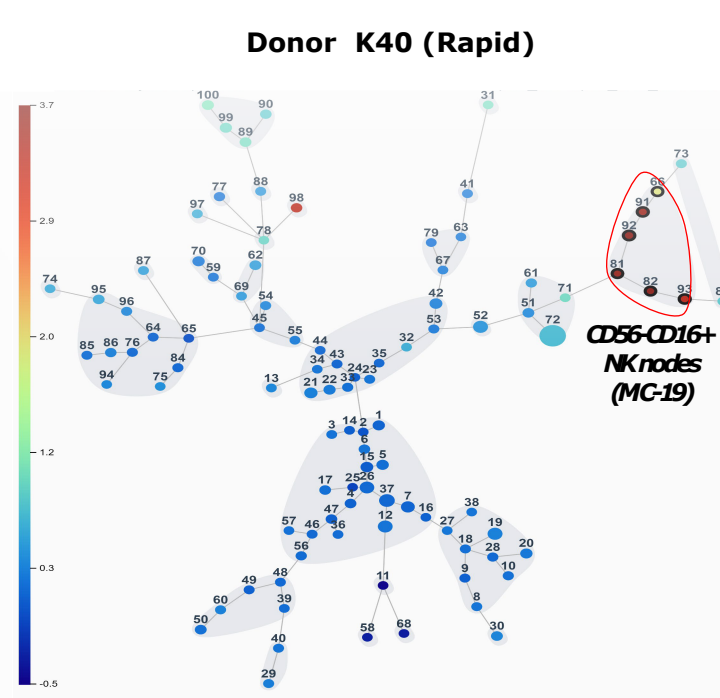

Alexa Fluor 647-A | KLRG1 (6 nodes)

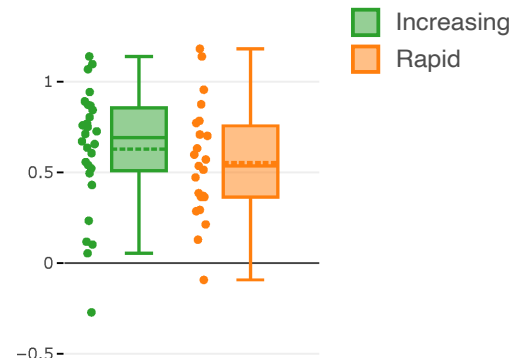

FITC-A | CD57 (6 nodes)

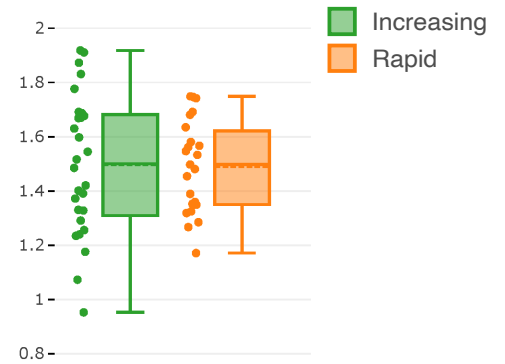

PE-Cy7-A | TIGIT (6 nodes)

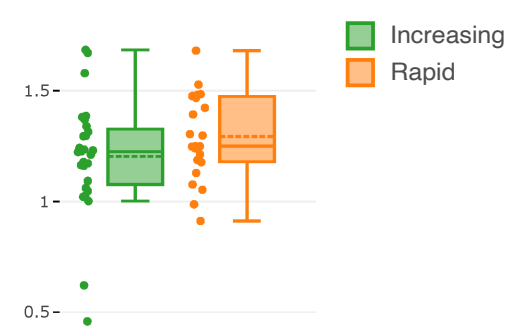

APC-eFluor 780-A | CD38 (6 nodes)

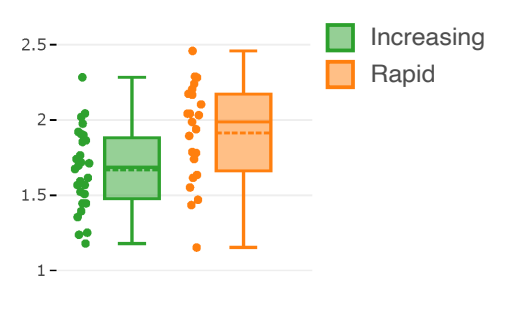

Source: https://medrxiv.org/content/10.1101/2023.03.22.23287261.full.pdf
