# Supplementary material for: Multi-omics analysis reveals drivers of loss of β-cell function after newly diagnosed autoimmune type 1 diabetes: An INNODIA‡ multicenter study
Source: bioRxiv or medRxiv preprint supplement (doi:10.1101/2023.03.22.23287261), 2023-03-28
Supplement: Supplementary file [file media-3.pdf]

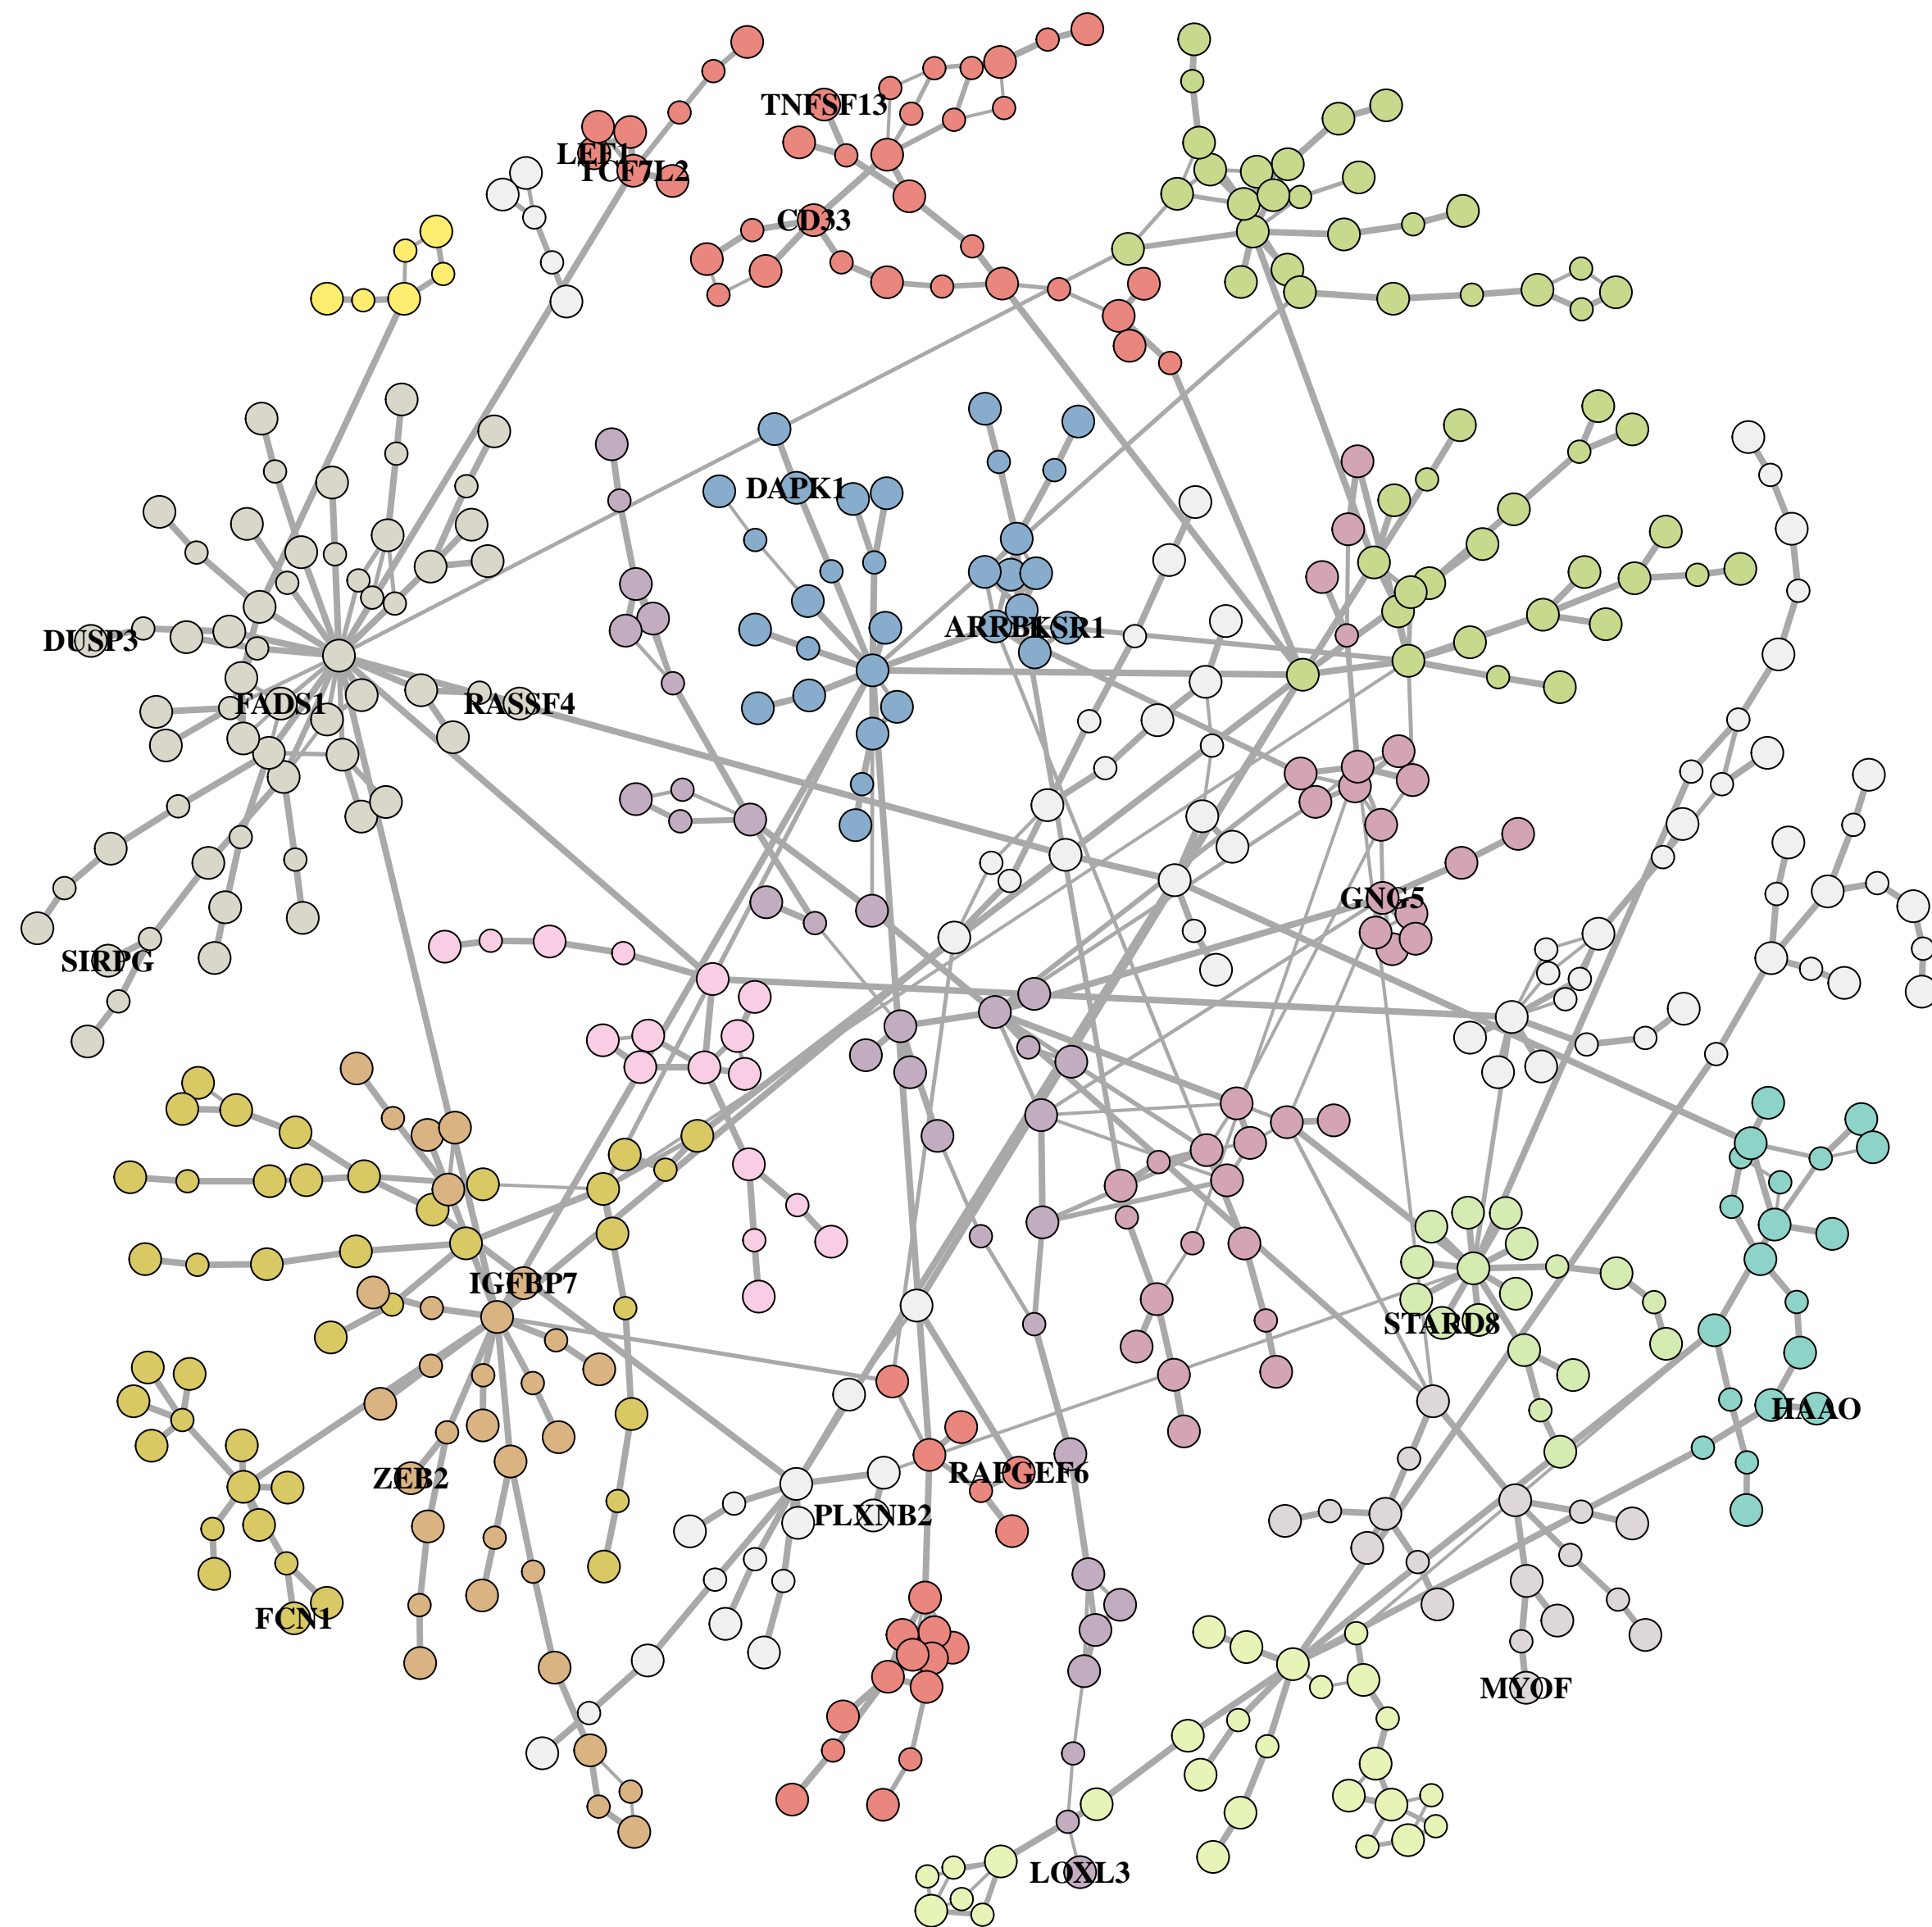

- Clusters**
- Adaptive Immune System
  - Autophagy
  - Biological oxidations
  - Cell Cycle
  - Cellular response to stress
  - Cytokine Signaling in Immune system
  - Innate Immune System
  - Lipid metabolism
  - MAPK signaling
  - Metabolism of carbohydrates
  - Metabolism of lipids
  - Regulation of TP53 Activity
  - Signaling by GPCR
  - Signaling by Rho GTPases
  - Unknown
