# Supplementary material for: Multi-omics analysis reveals drivers of loss of β-cell function after newly diagnosed autoimmune type 1 diabetes: An INNODIA‡ multicenter study
Source: bioRxiv or medRxiv preprint supplement (doi:10.1101/2023.03.22.23287261), 2023-03-28
Supplement: Supplementary file [file media-4.pdf]

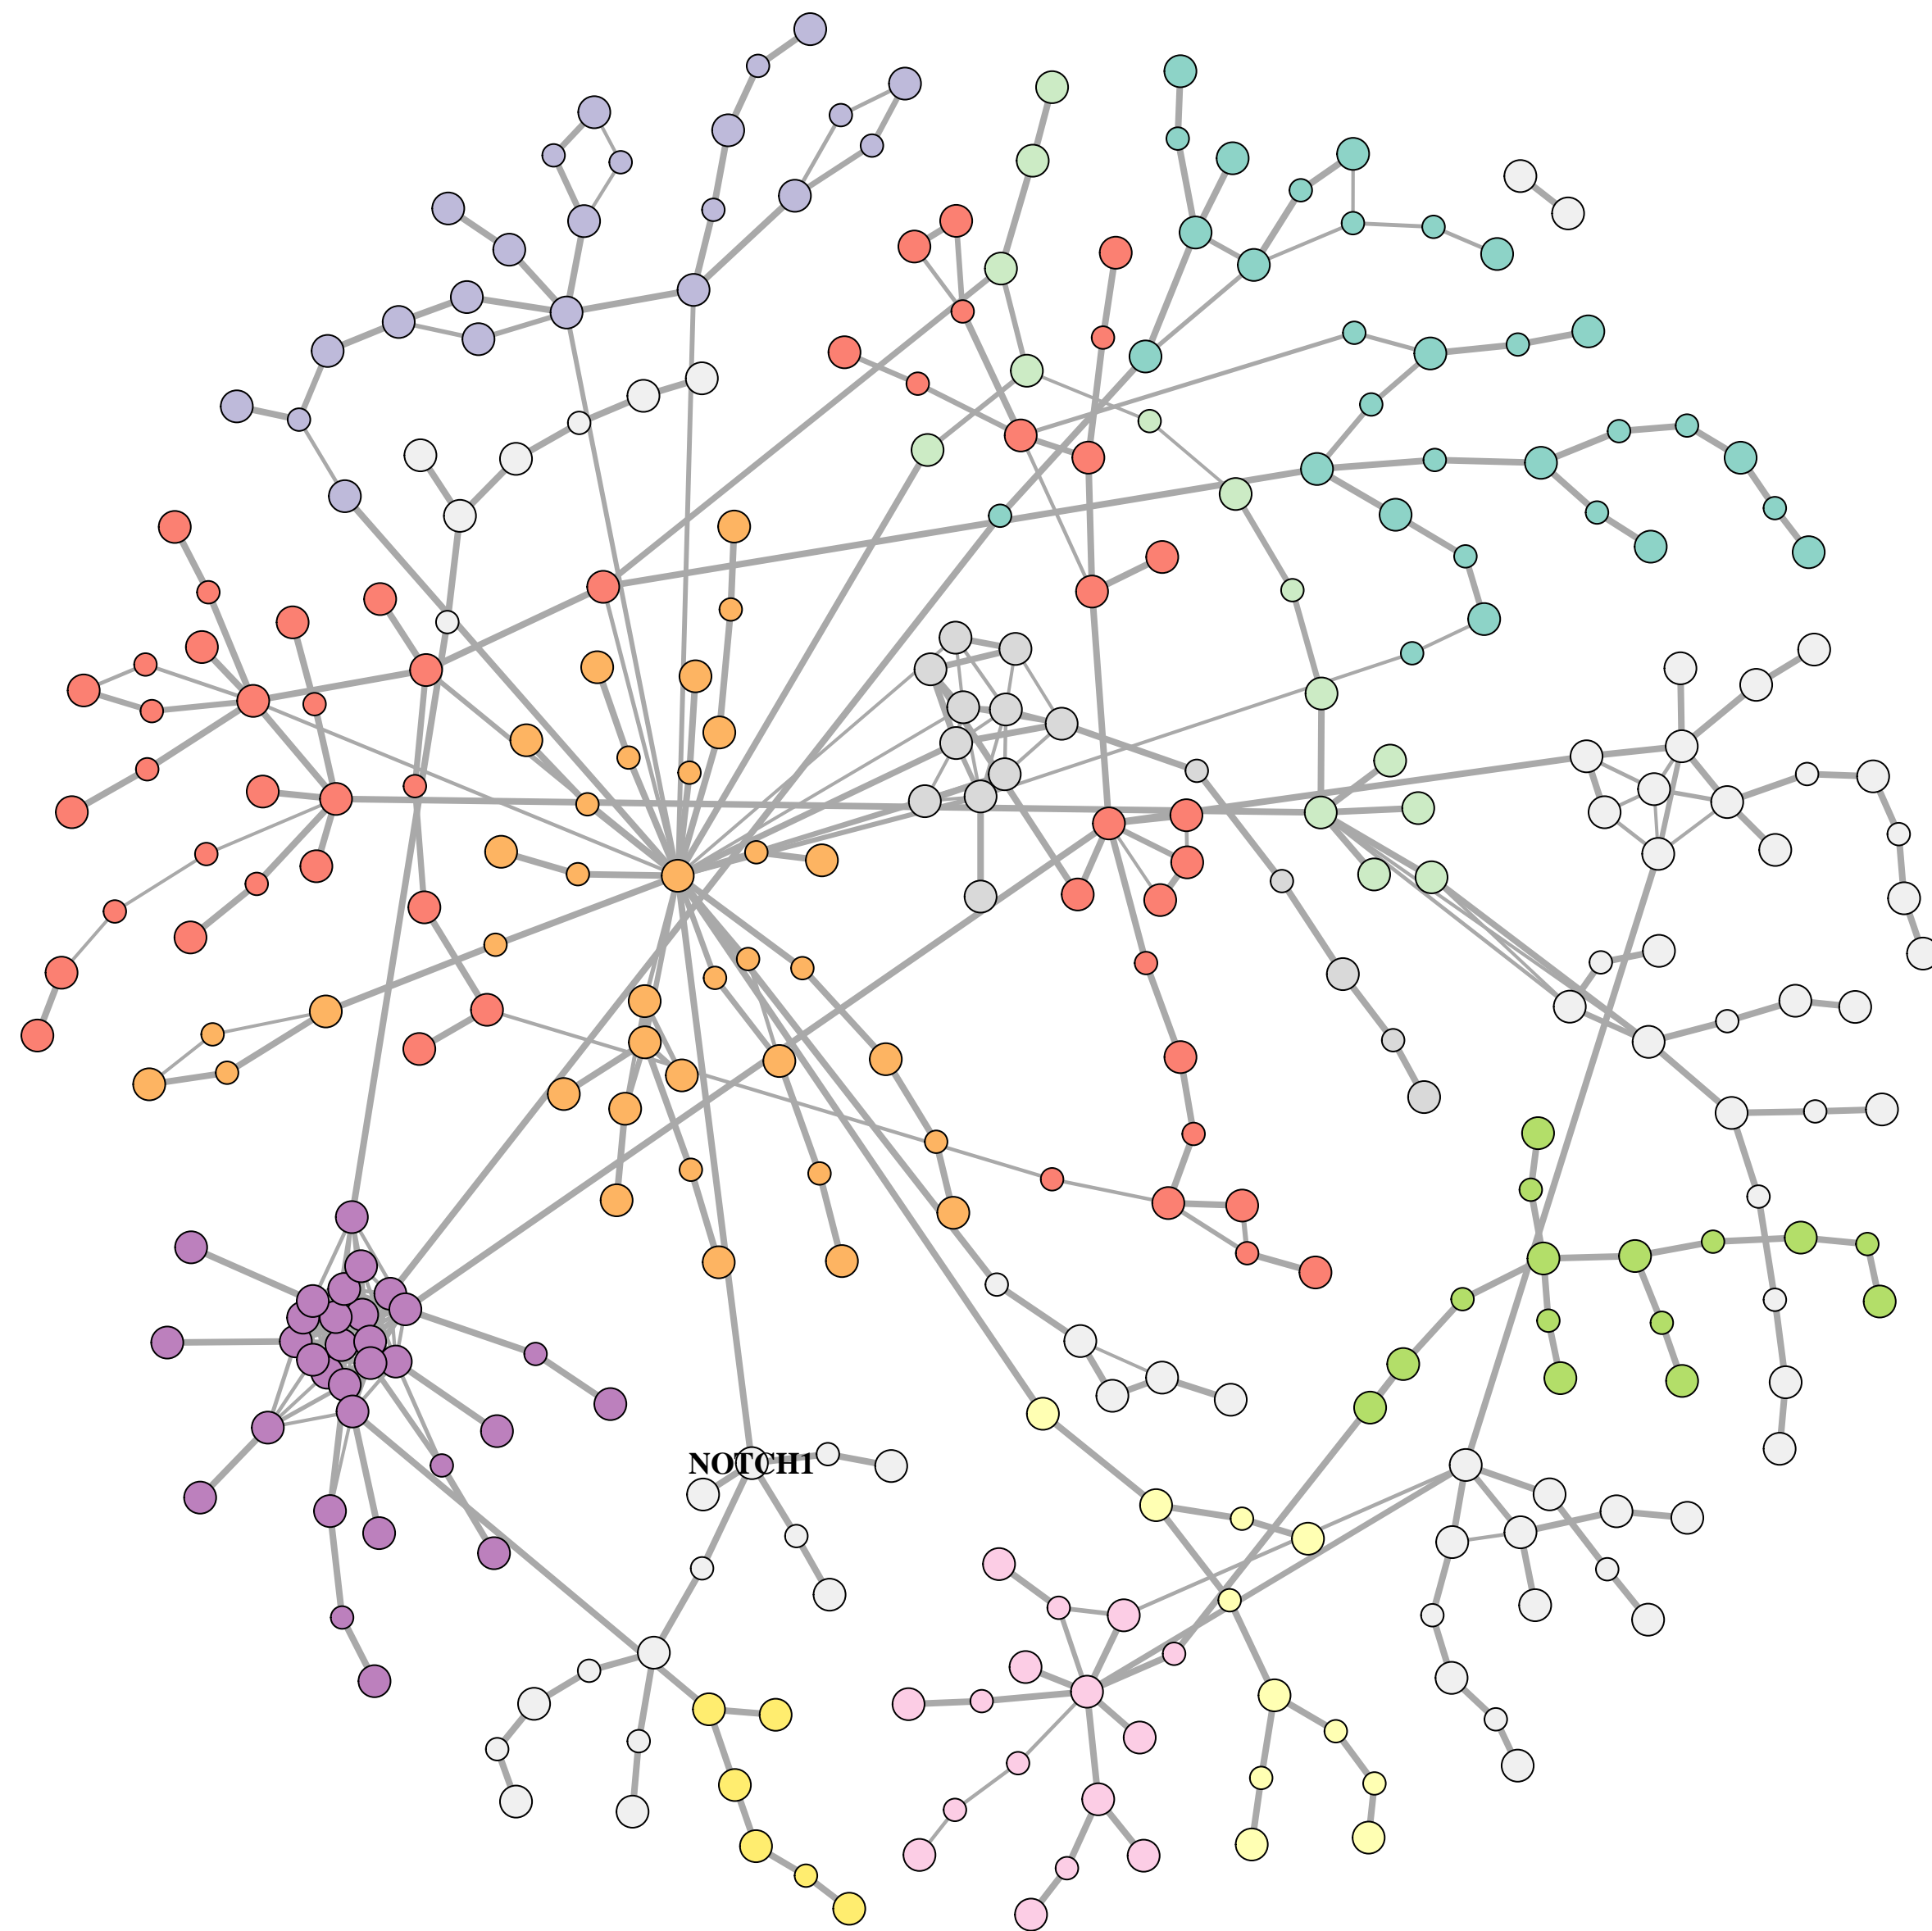

- Clusters**
- Adaptive Immune System
  - Autophagy
  - Cell Cycle
  - Eukaryotic/Viral mRNA Tranlation
  - Membrane Trafficking
  - Metabolism of carbohydrates
  - Metabolism of nucleotides
  - Metabolism of proteins
  - Peptide hormone metabolism
  - Signaling by GPCR
  - Signaling by Receptor Tyrosine Kinases
  - Unknown
