# Supplementary material for: Multi-omics analysis reveals drivers of loss of β-cell function after newly diagnosed autoimmune type 1 diabetes: An INNODIA‡ multicenter study
Source: bioRxiv or medRxiv preprint supplement (doi:10.1101/2023.03.22.23287261), 2023-03-28

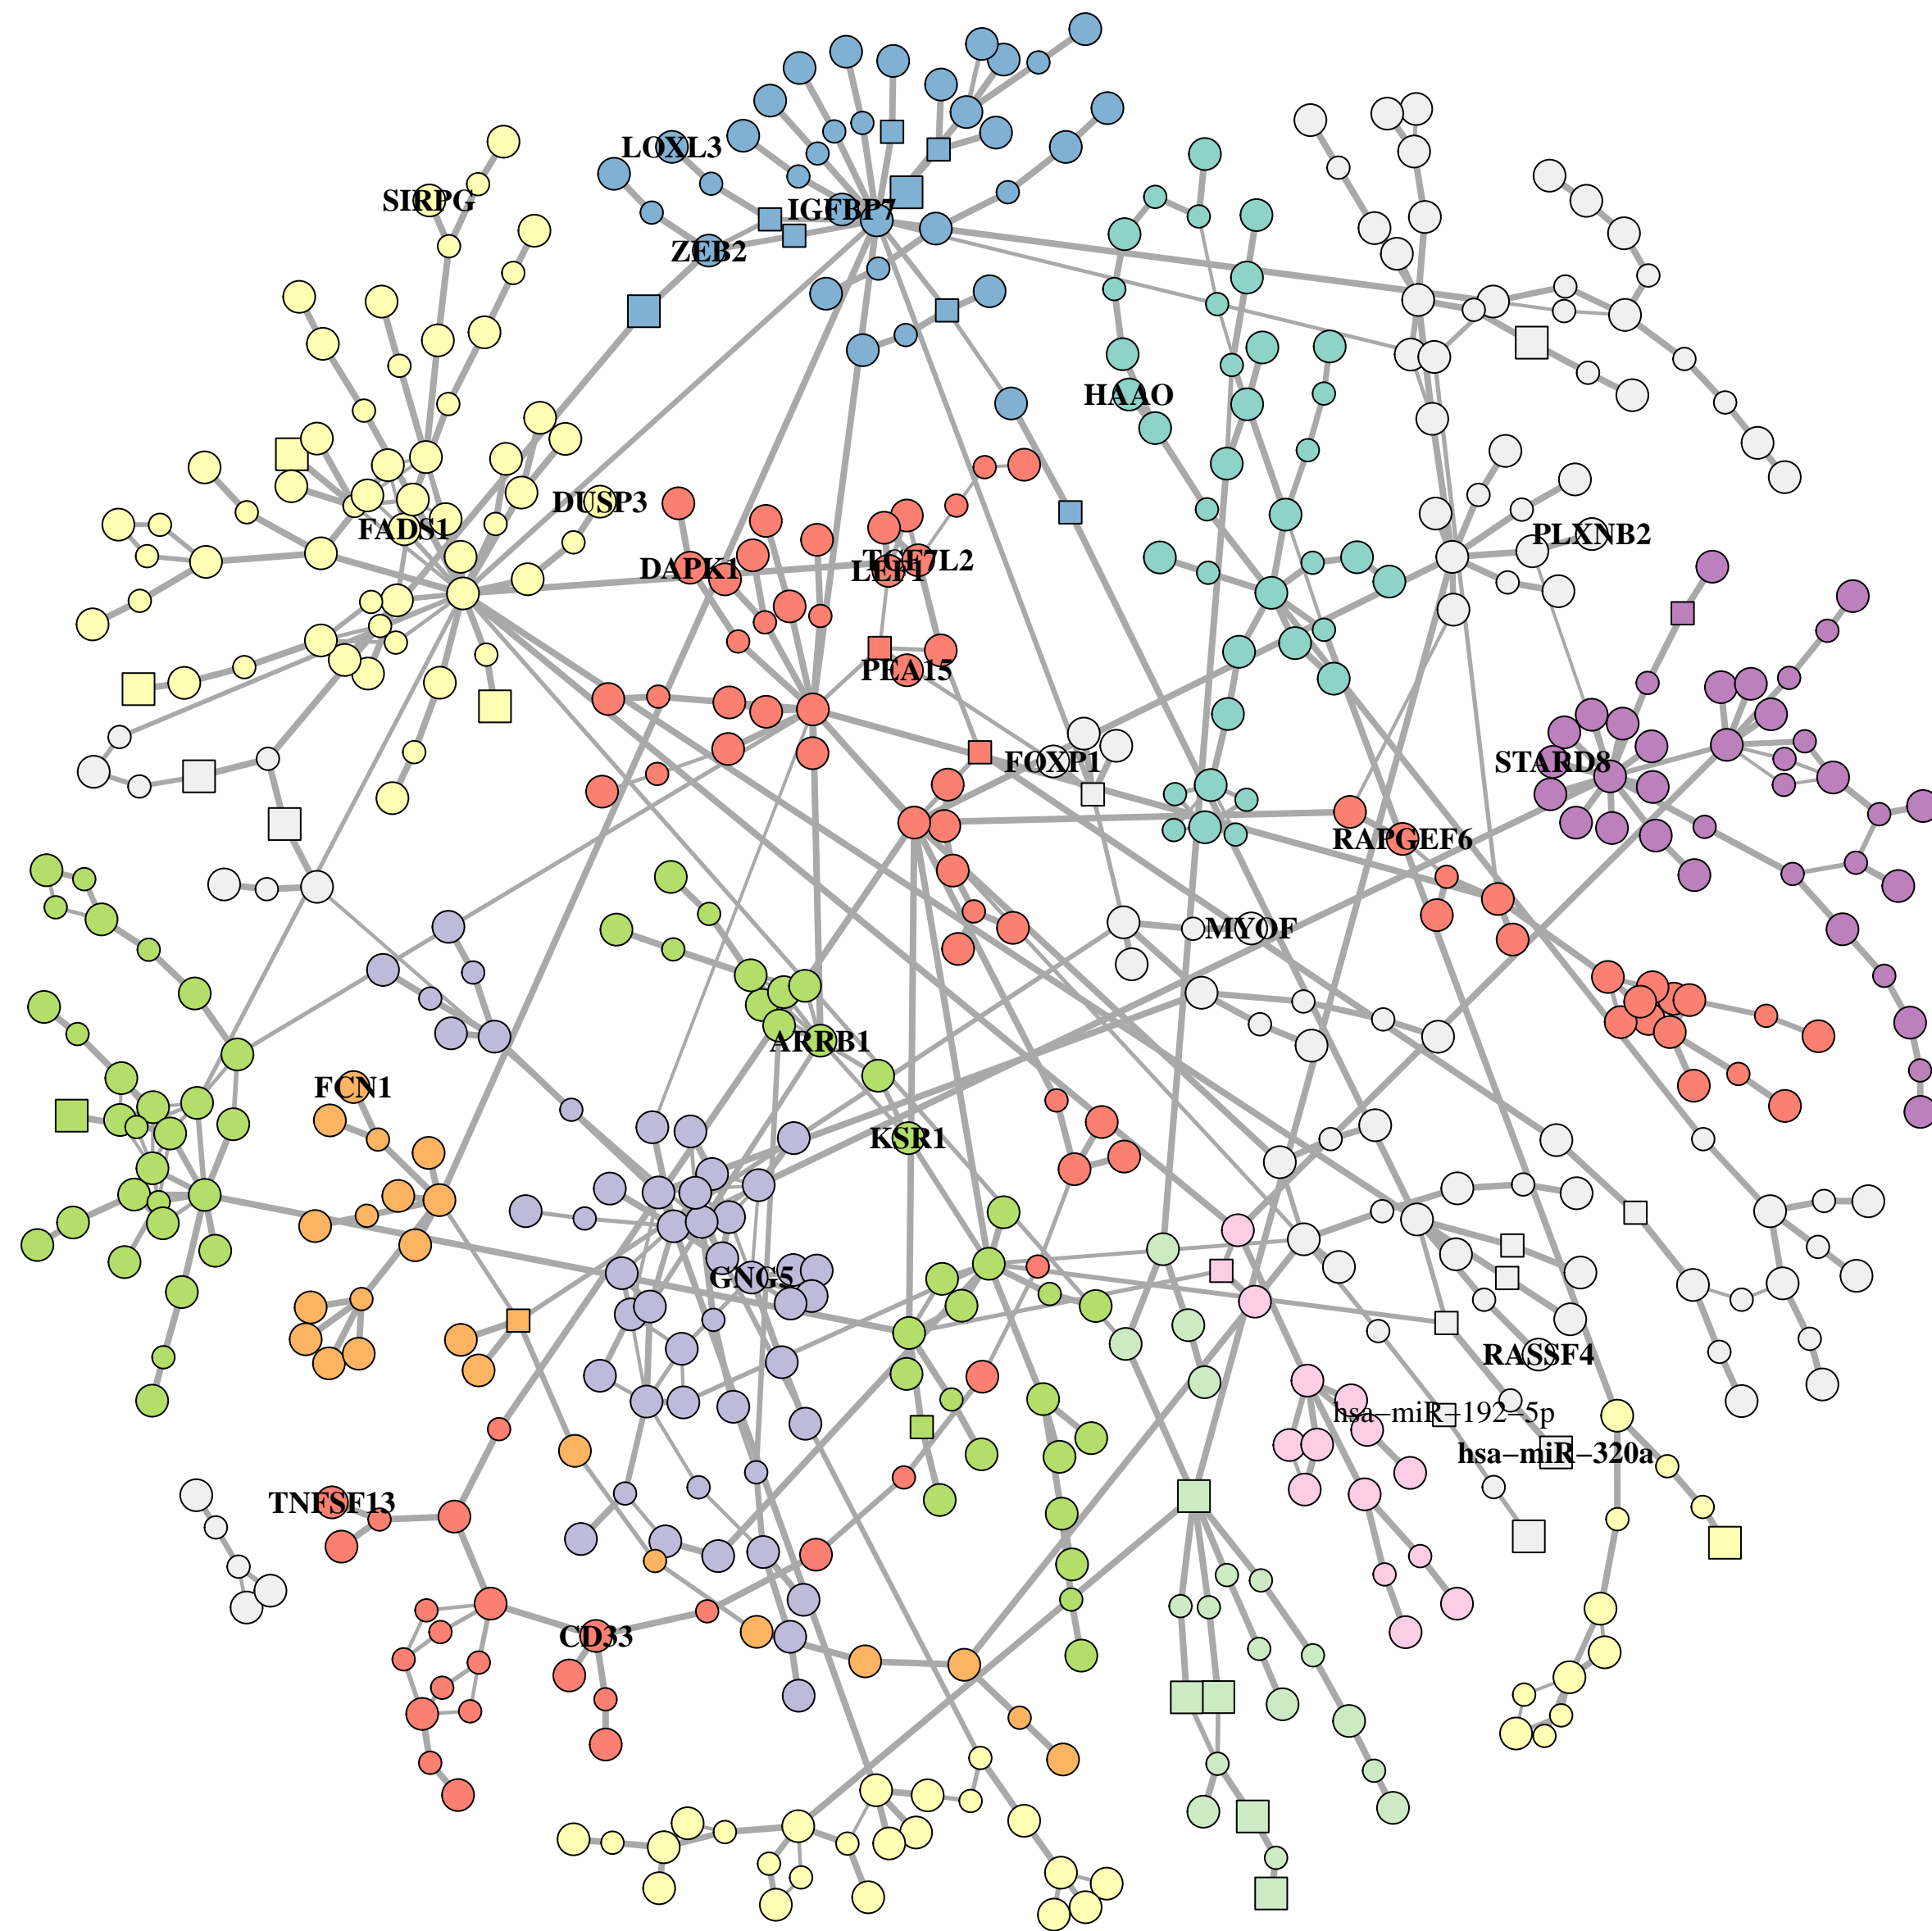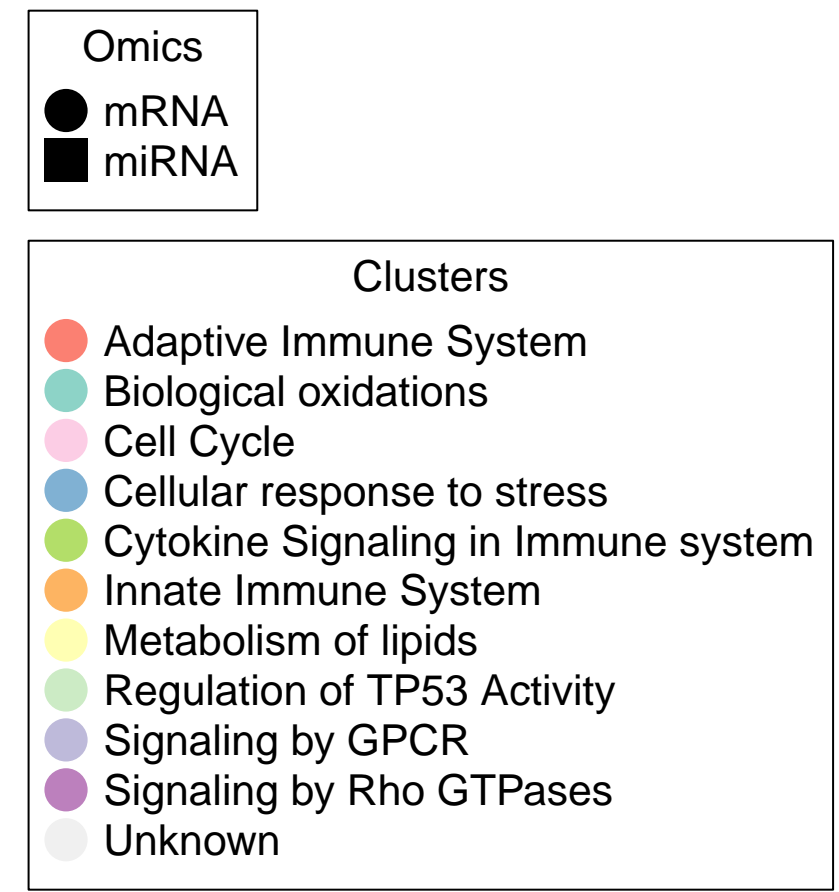

Supplement: Supplementary file [file media-5.pdf]
