# Supplementary material for: Multi-omics analysis reveals drivers of loss of β-cell function after newly diagnosed autoimmune type 1 diabetes: An INNODIA‡ multicenter study
Source: bioRxiv or medRxiv preprint supplement (doi:10.1101/2023.03.22.23287261), 2023-03-28
Supplement: Supplementary file [file media-6.pdf]

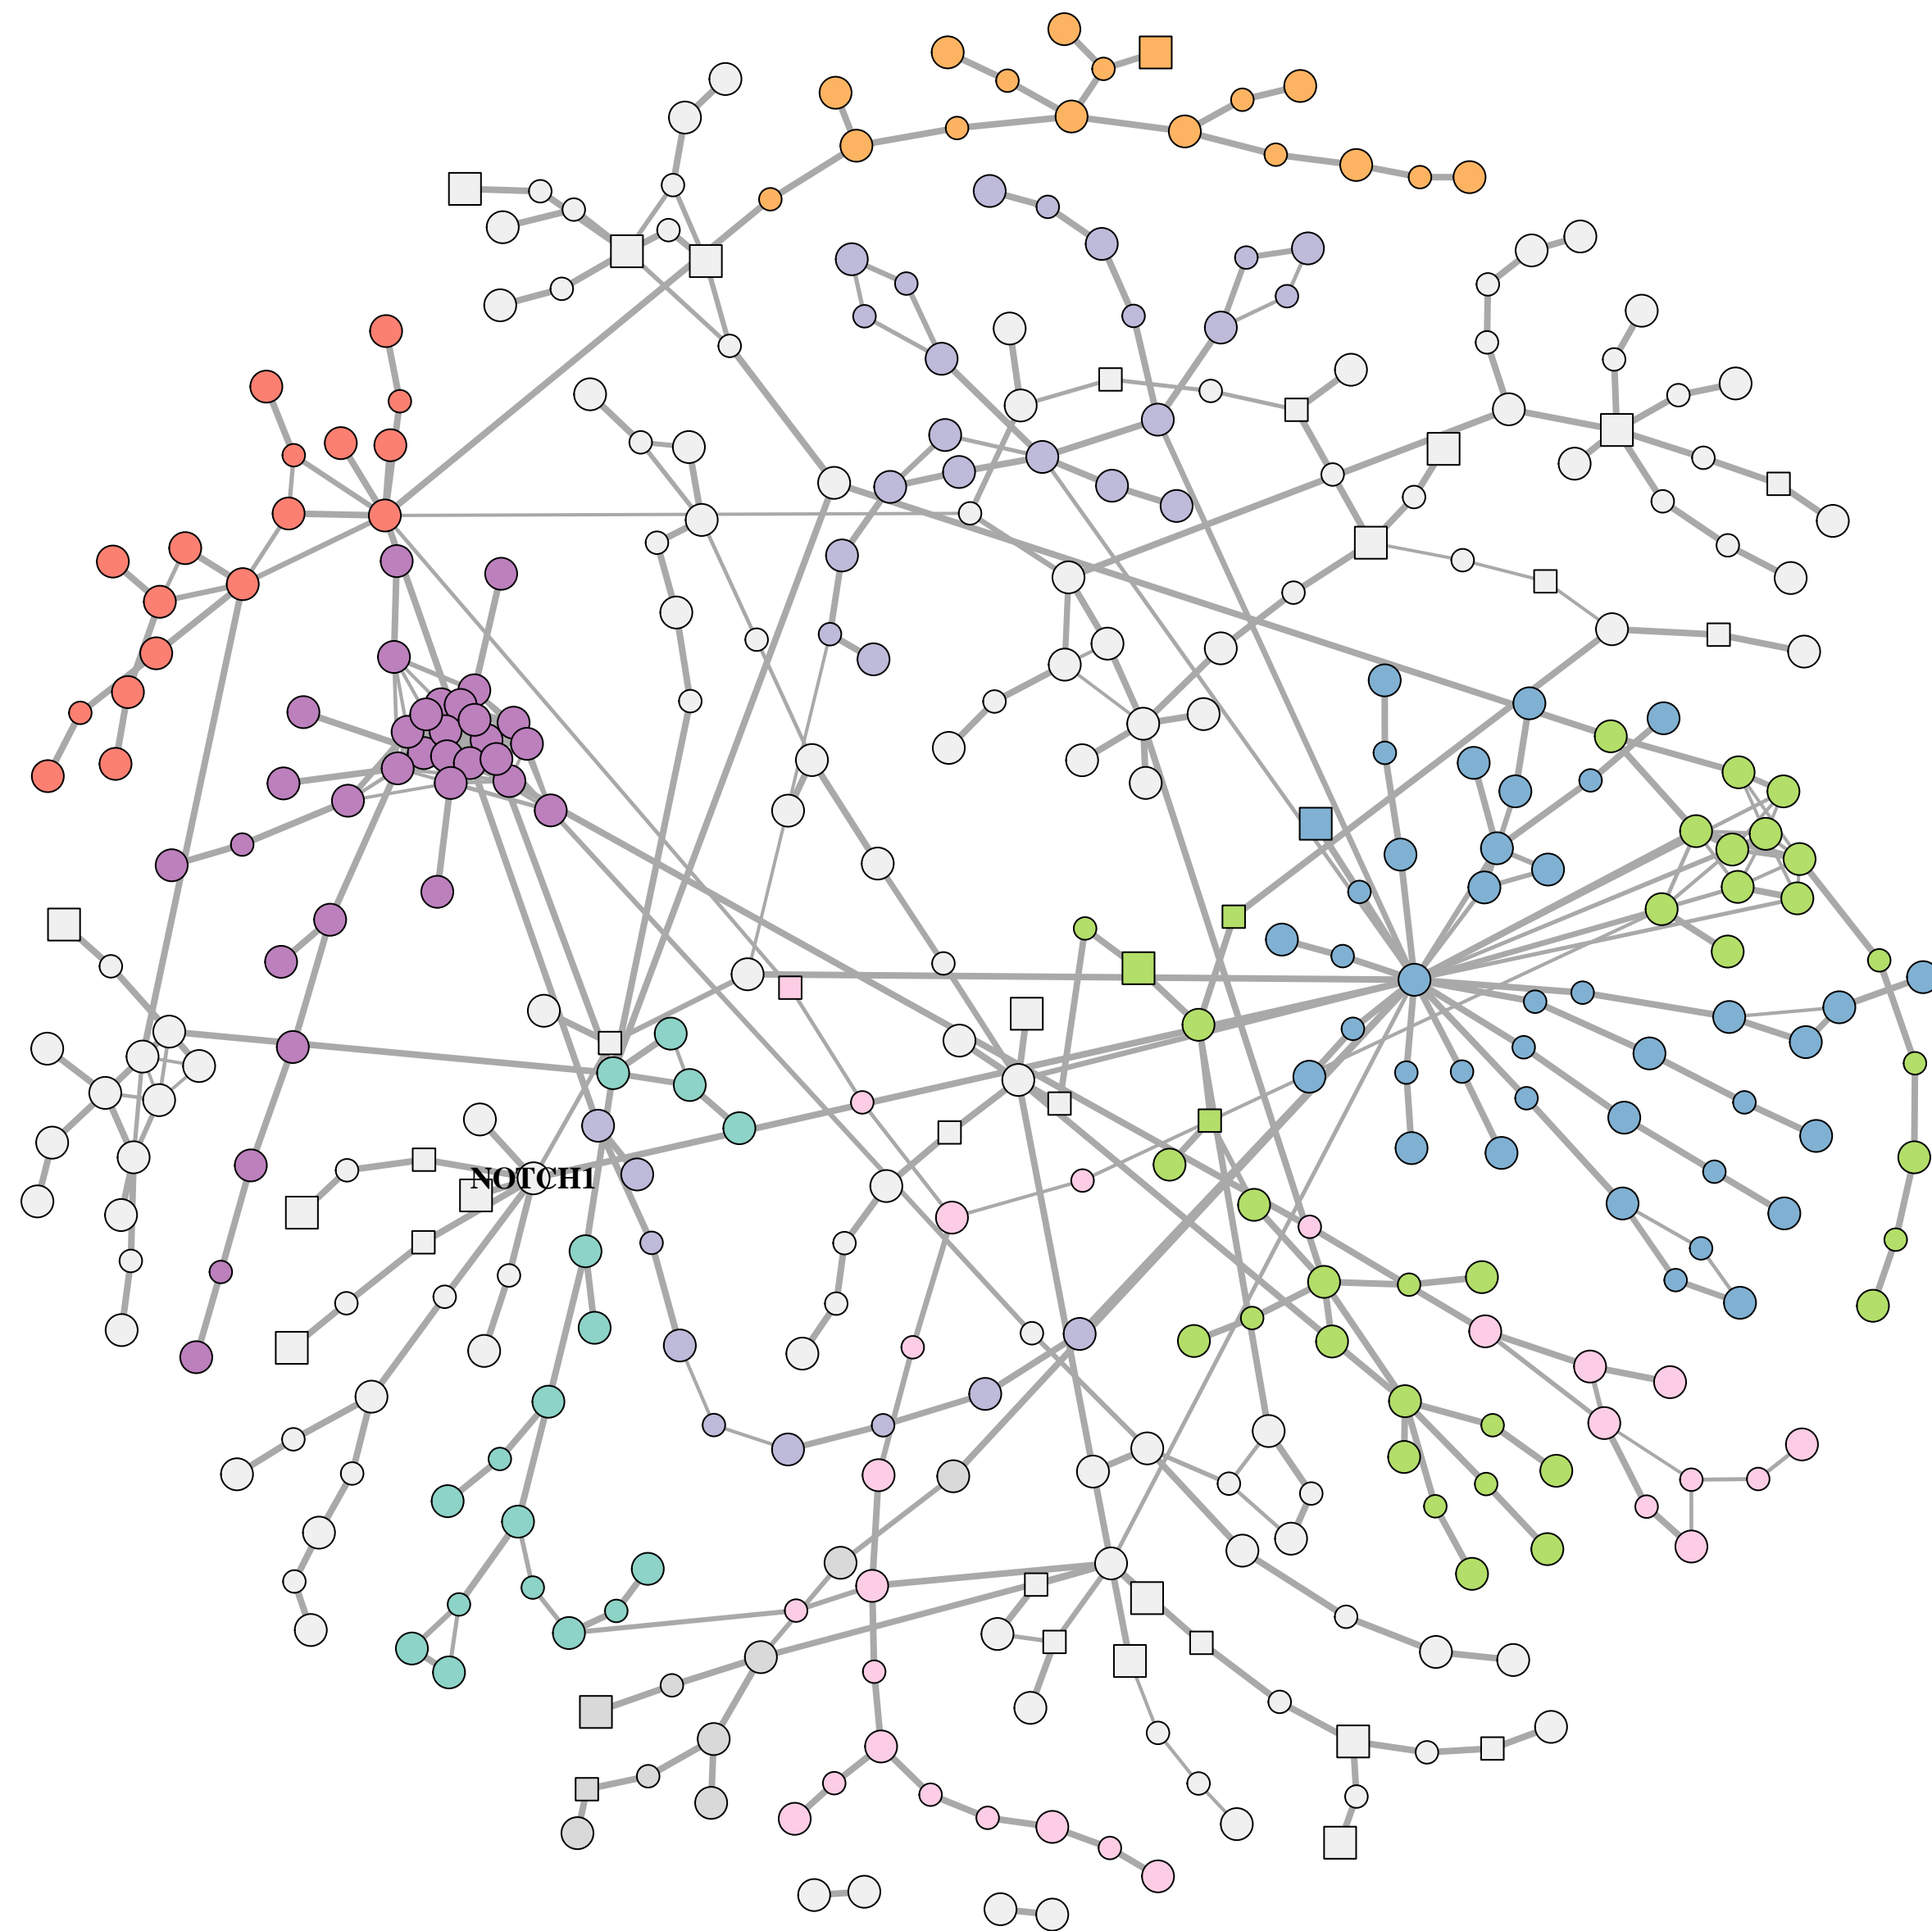

**Omics**  
 ● mRNA  
 ■ miRNA

**Clusters**

- Adaptive Immune System
- Cell Cycle
- Cytokine Signaling in Immune system
- Eukaryotic/Viral mRNA Translation
- Membrane Trafficking
- Metabolism of nucleotides
- Metabolism of proteins
- Signaling by GPCR
- Signaling by WNT
- Unknown
