# Supplementary material for: Multi-omics analysis reveals drivers of loss of β-cell function after newly diagnosed autoimmune type 1 diabetes: An INNODIA‡ multicenter study
Source: bioRxiv or medRxiv preprint supplement (doi:10.1101/2023.03.22.23287261), 2023-03-28
Supplement: Supplementary file [file media-8.pdf]

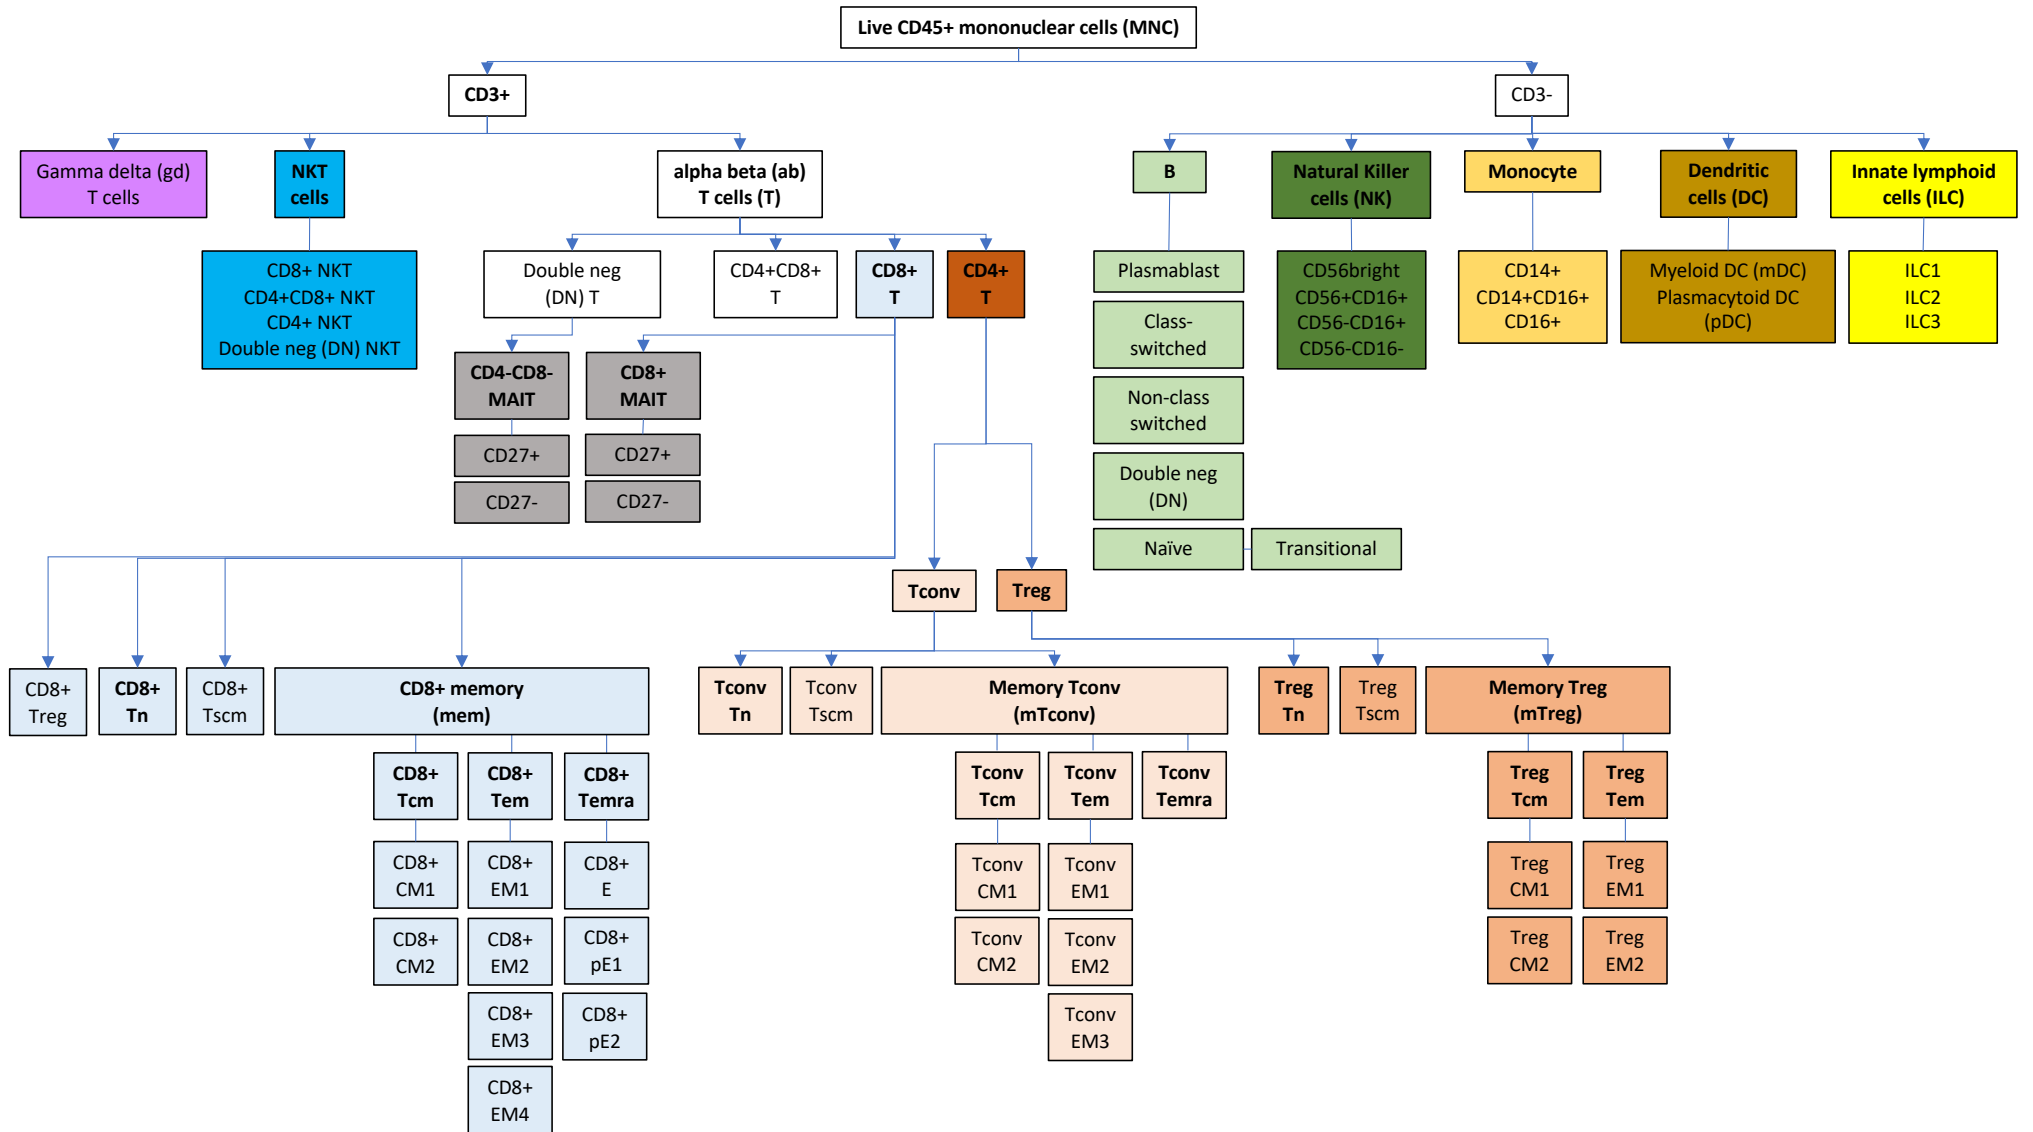

Activation, exhaustion and senescence markers

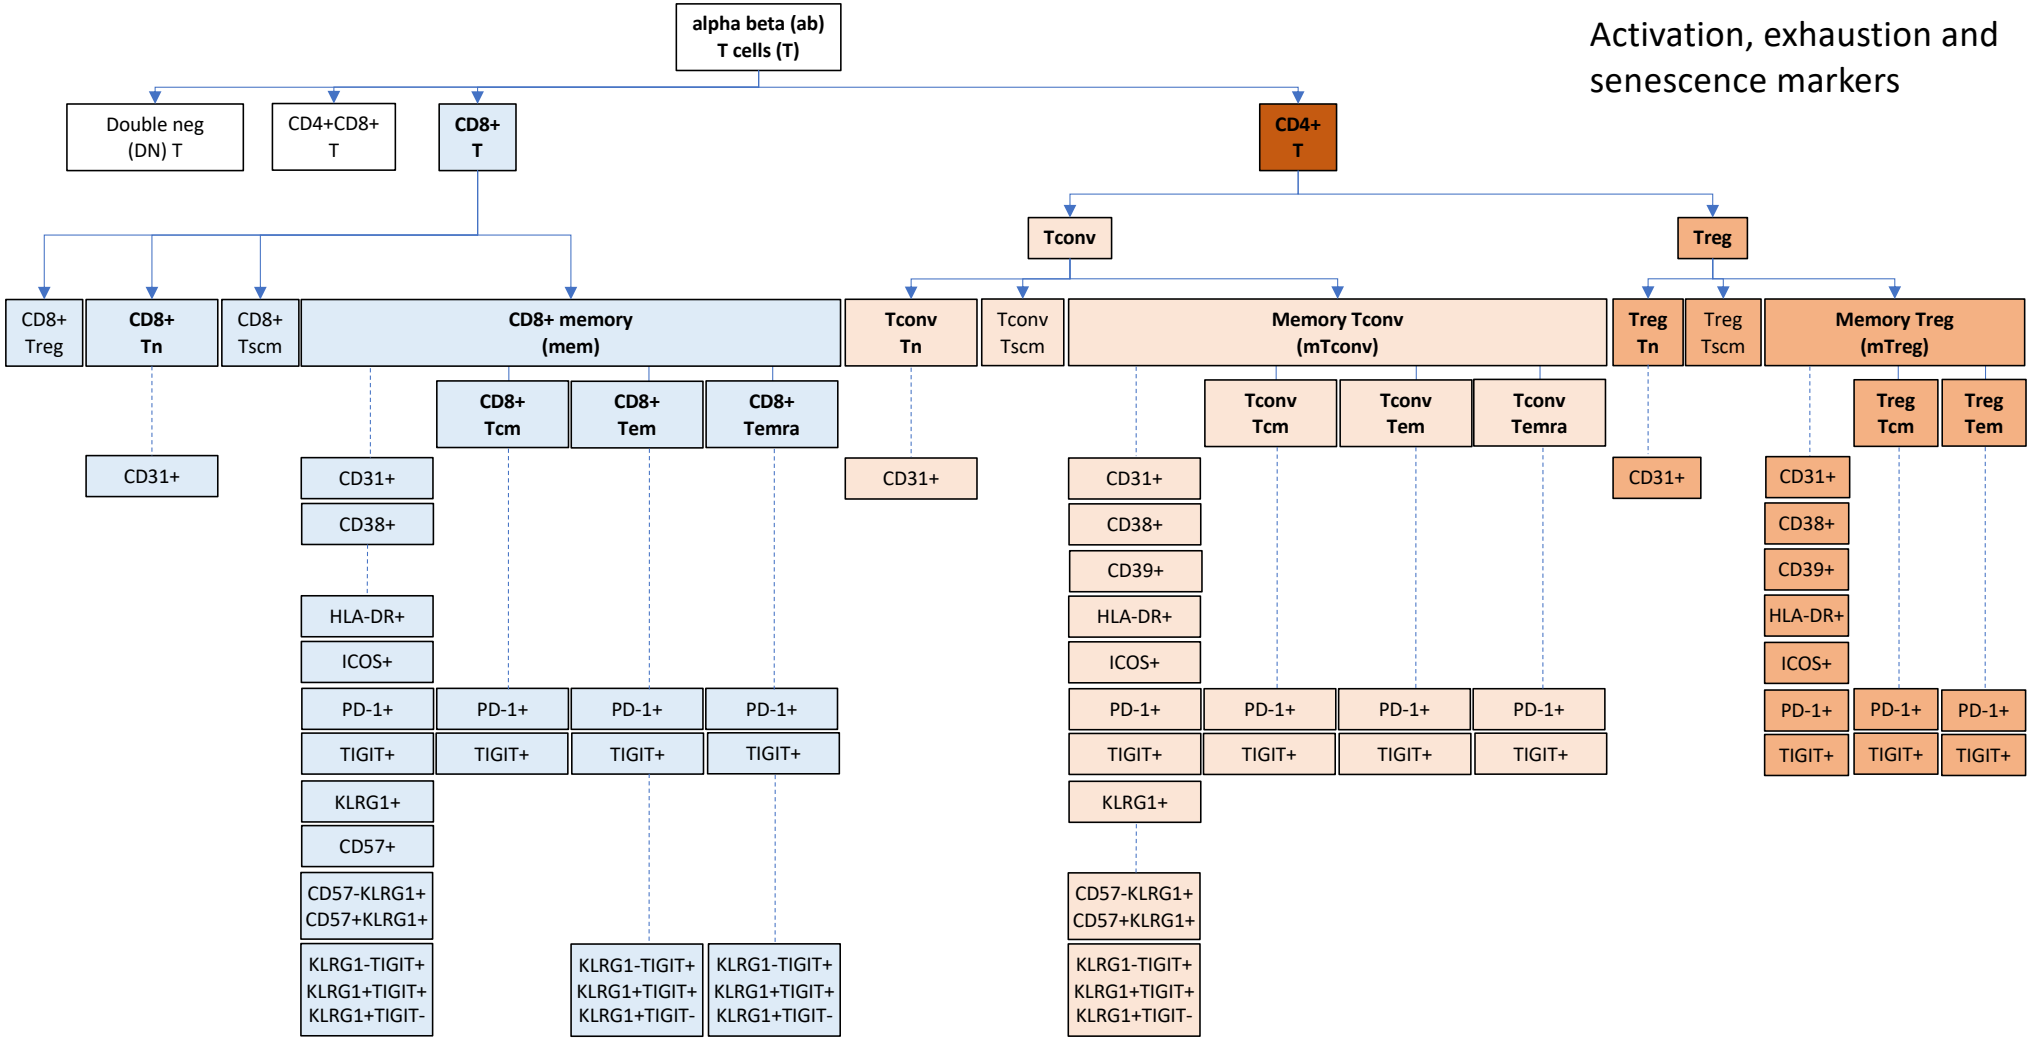

# Helper T cells and Helper T cell-like Tregs

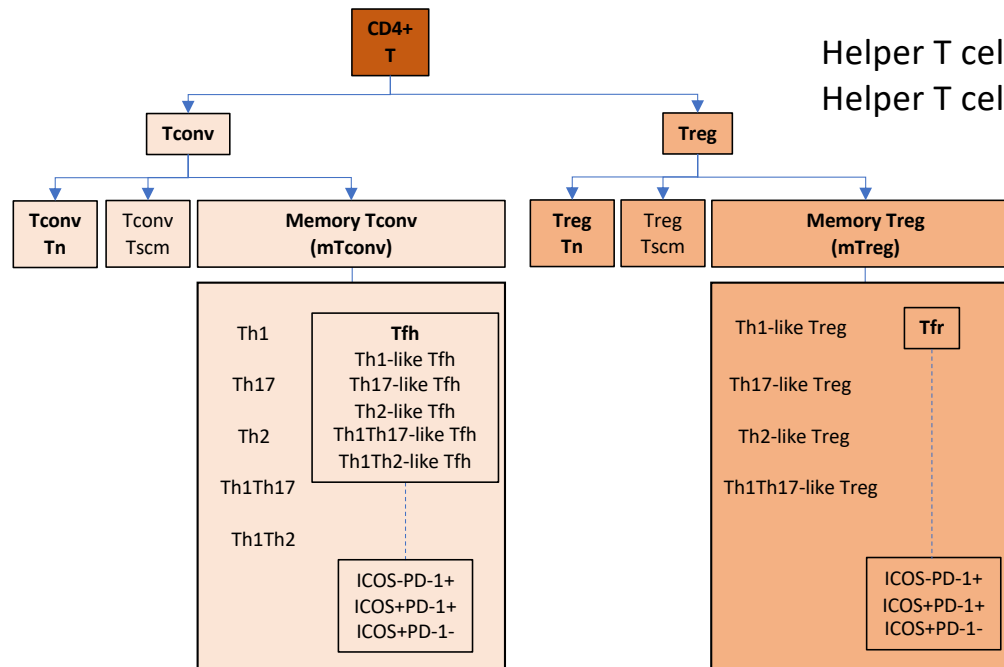

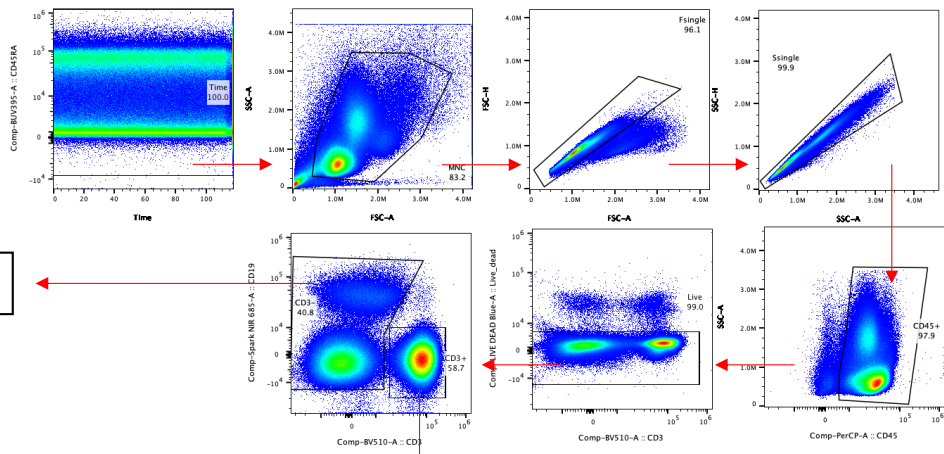

See Non-CD3 slide

gd T cells

NKT

CD8+ T

CD4+ T

CD8+ MAIT

CD4-CD8-  
MAIT

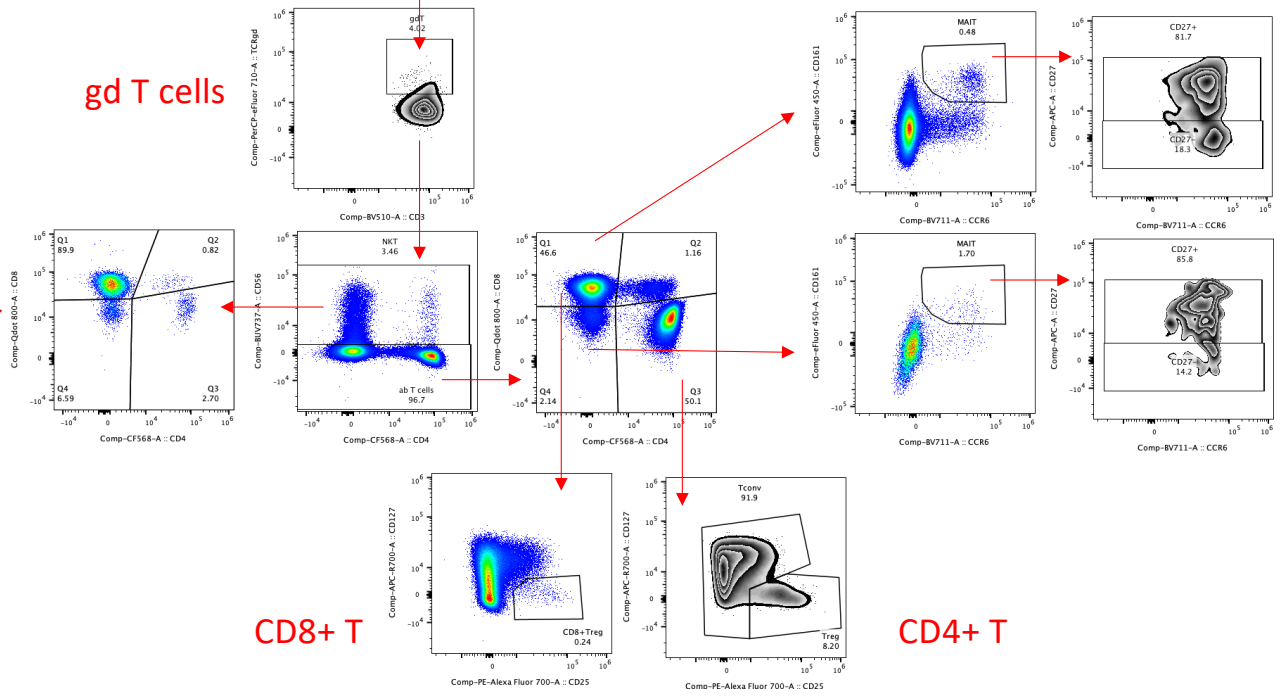

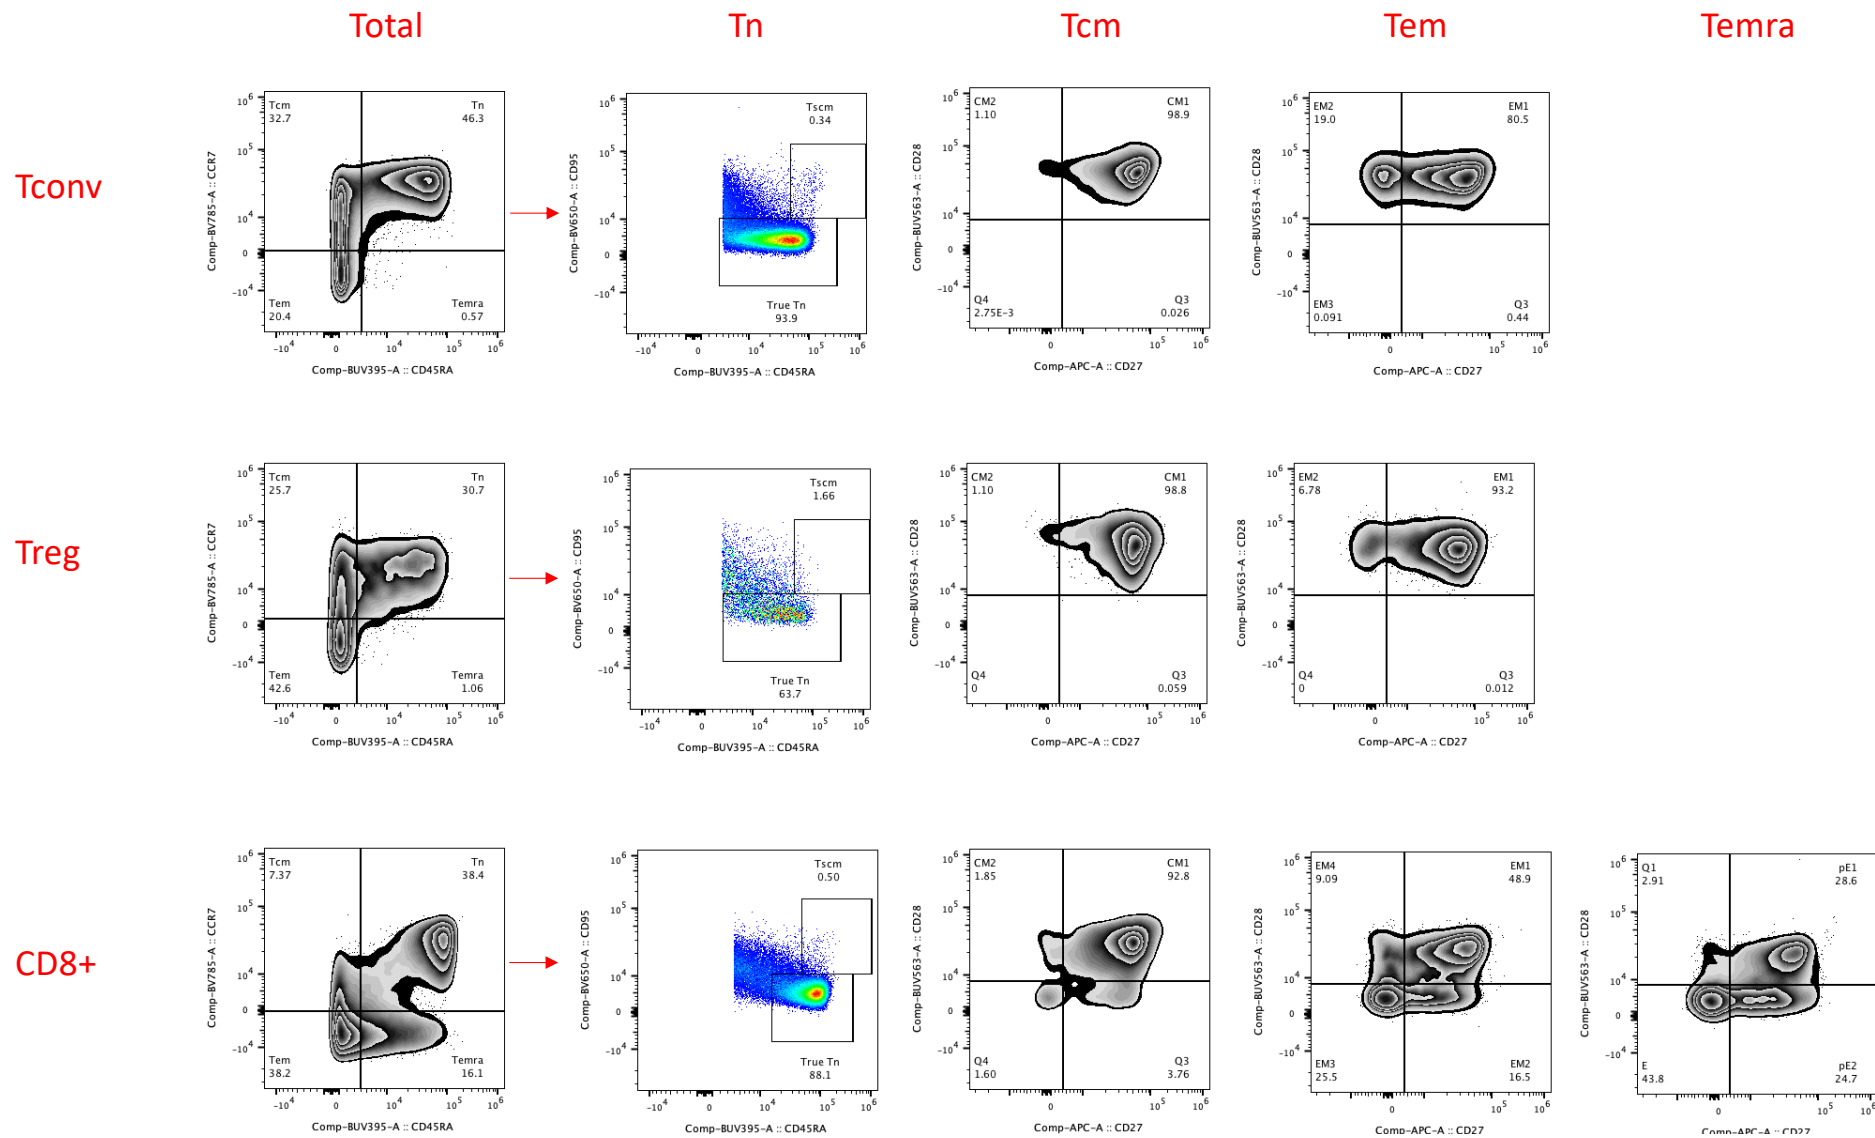

CD31+ Tn

CD31+ total mem

CD38+ total mem

CD39+ total mem

HLA-DR+ total mem

ICOS+ total mem

Tconv

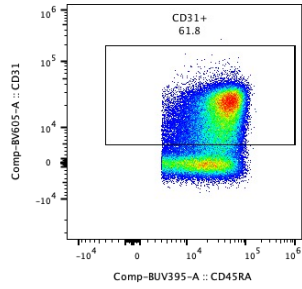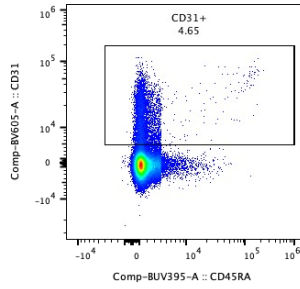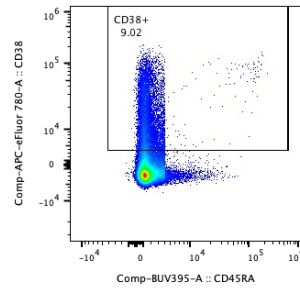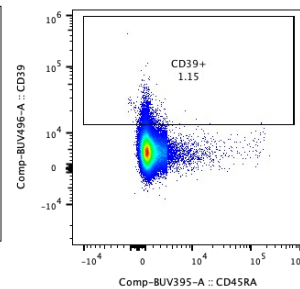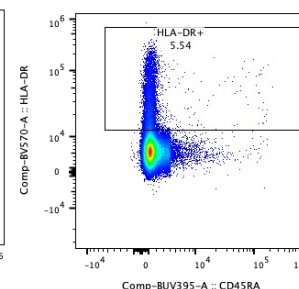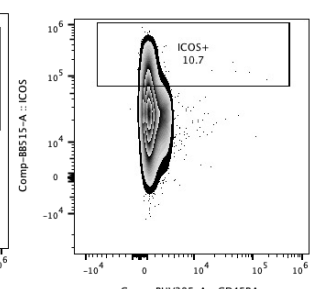

Treg

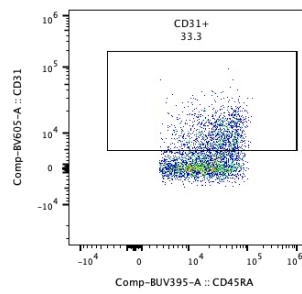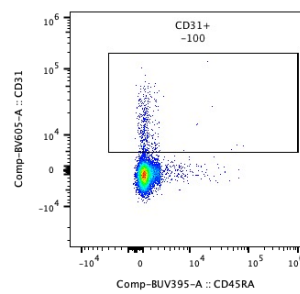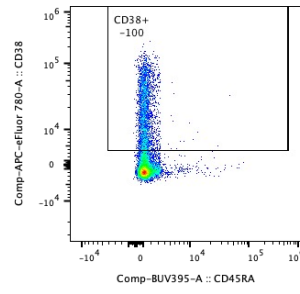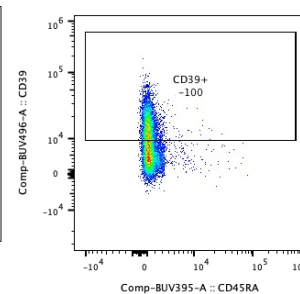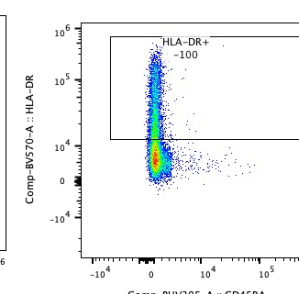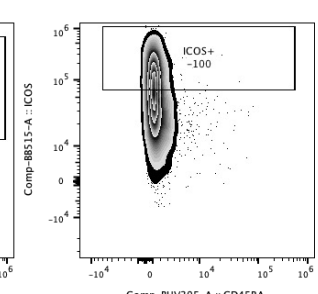

CD8+

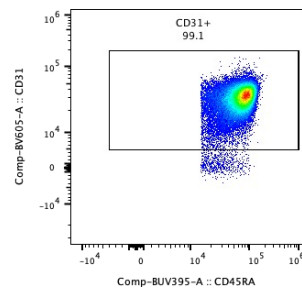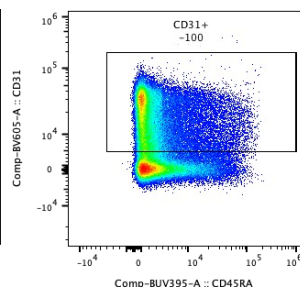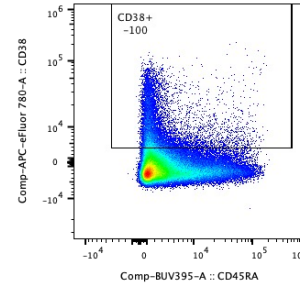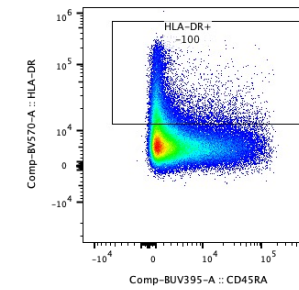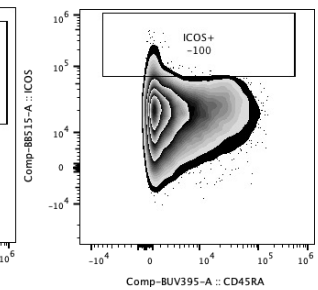

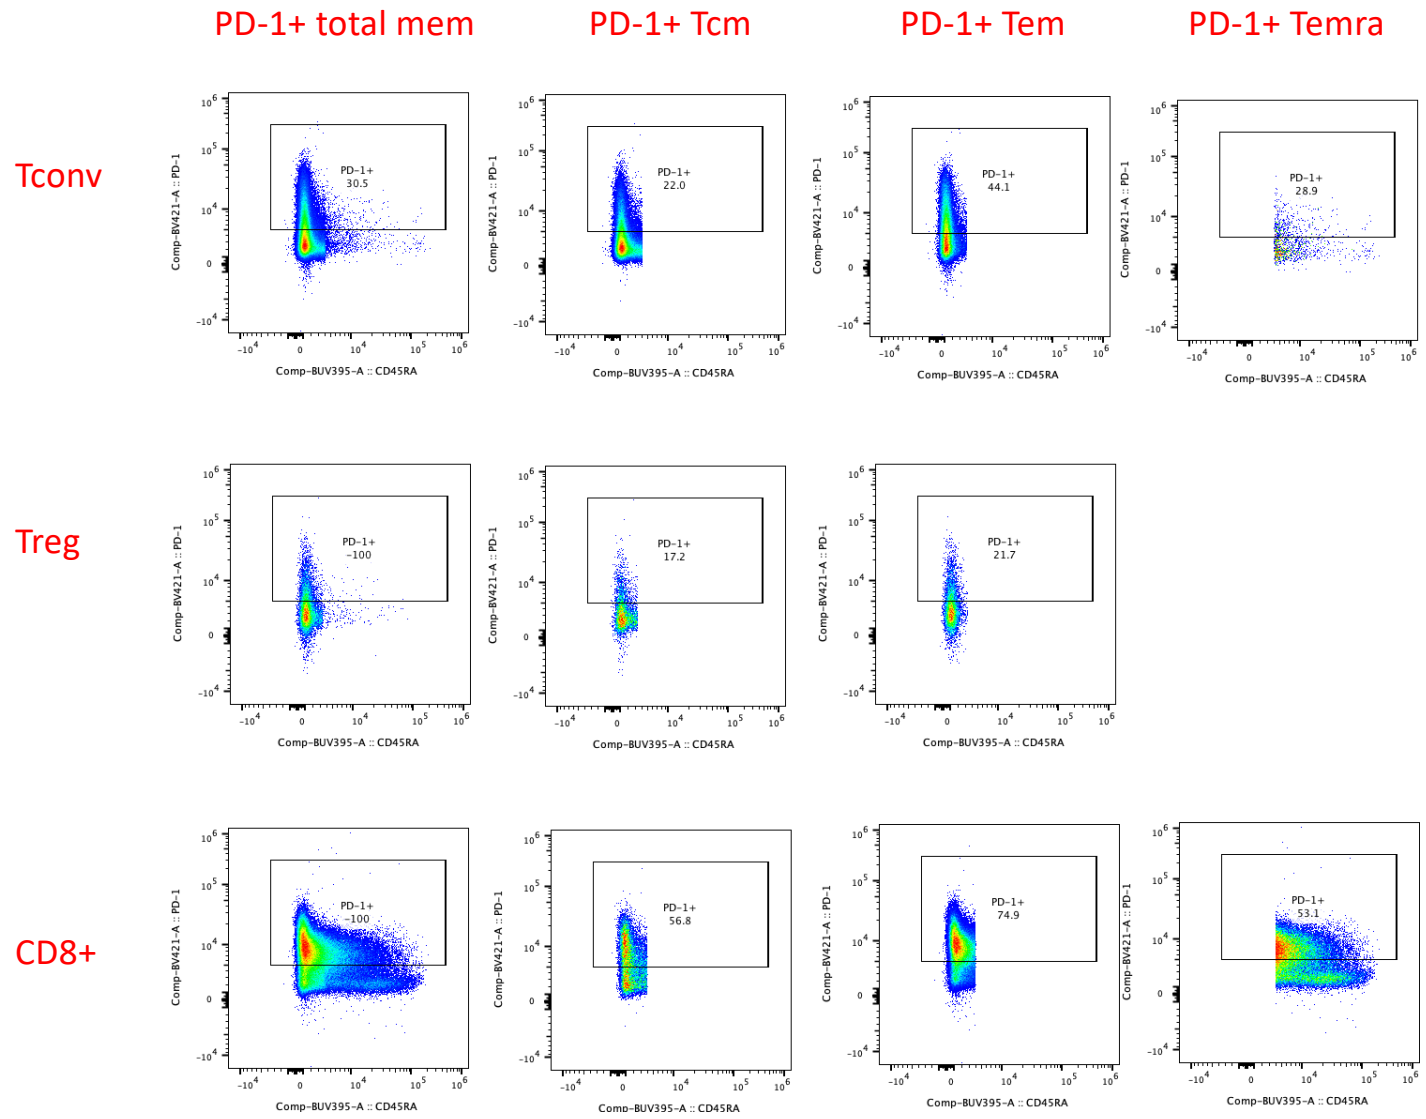

Tconv

TIGIT+ total mem

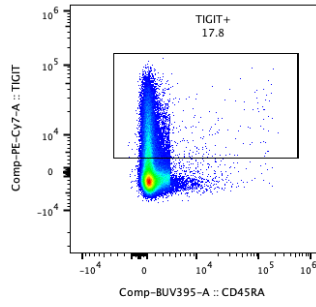

TIGIT+ Tcm

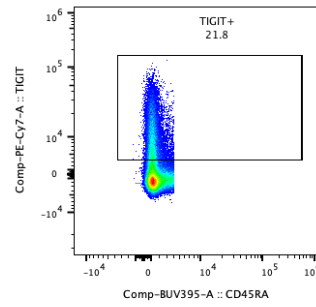

TIGIT+ Tem

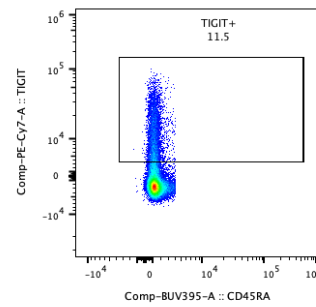

TIGIT+ Temra

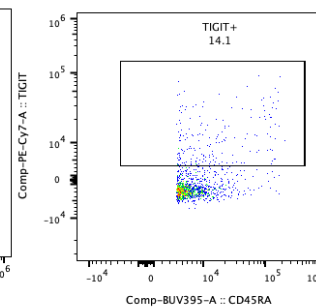

Treg

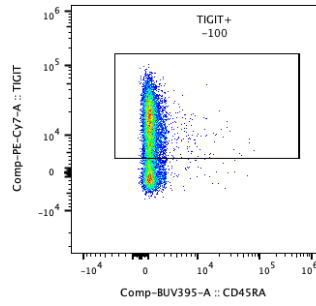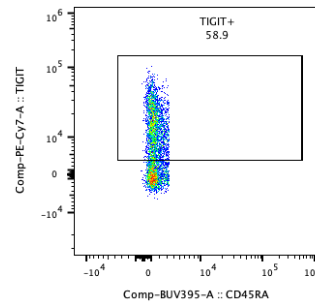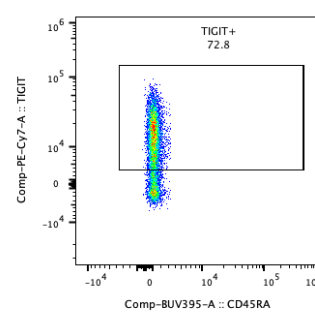

CD8+

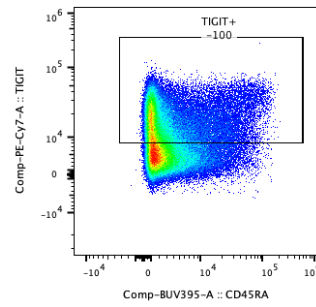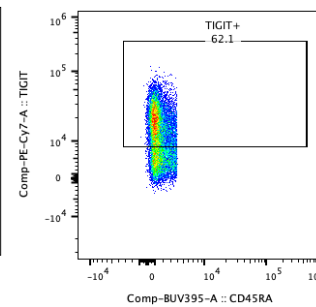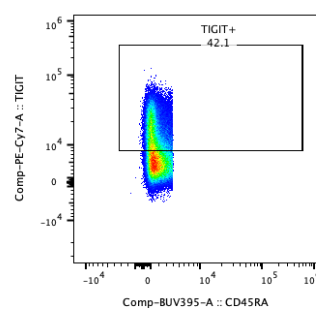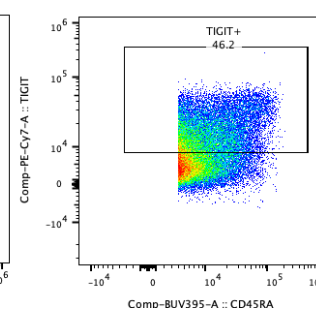



KLRG1 & CD57  
total mem

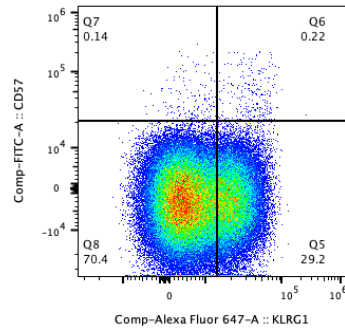

KLRG1 & TIGIT  
total mem

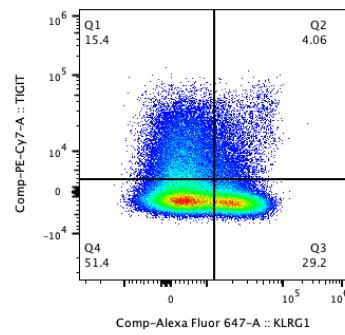

KLRG1 & TIGIT  
Tem

KLRG1 & TIGIT  
Temra

Tconv

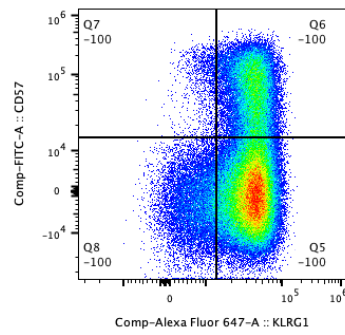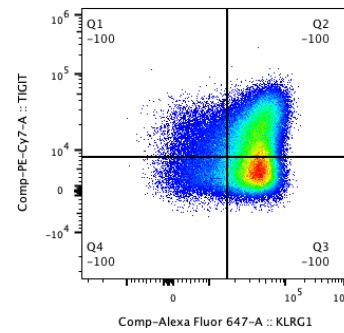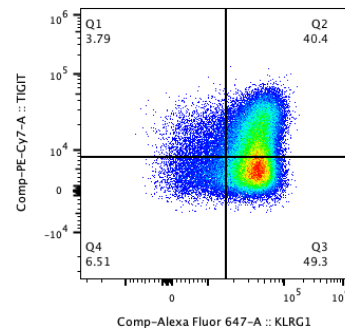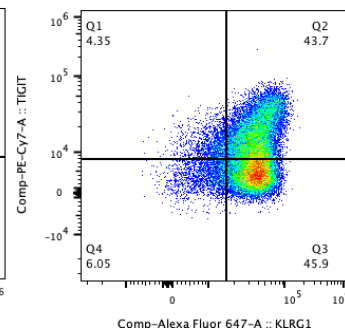

CD8+

# Memory Tconv (mTconv)

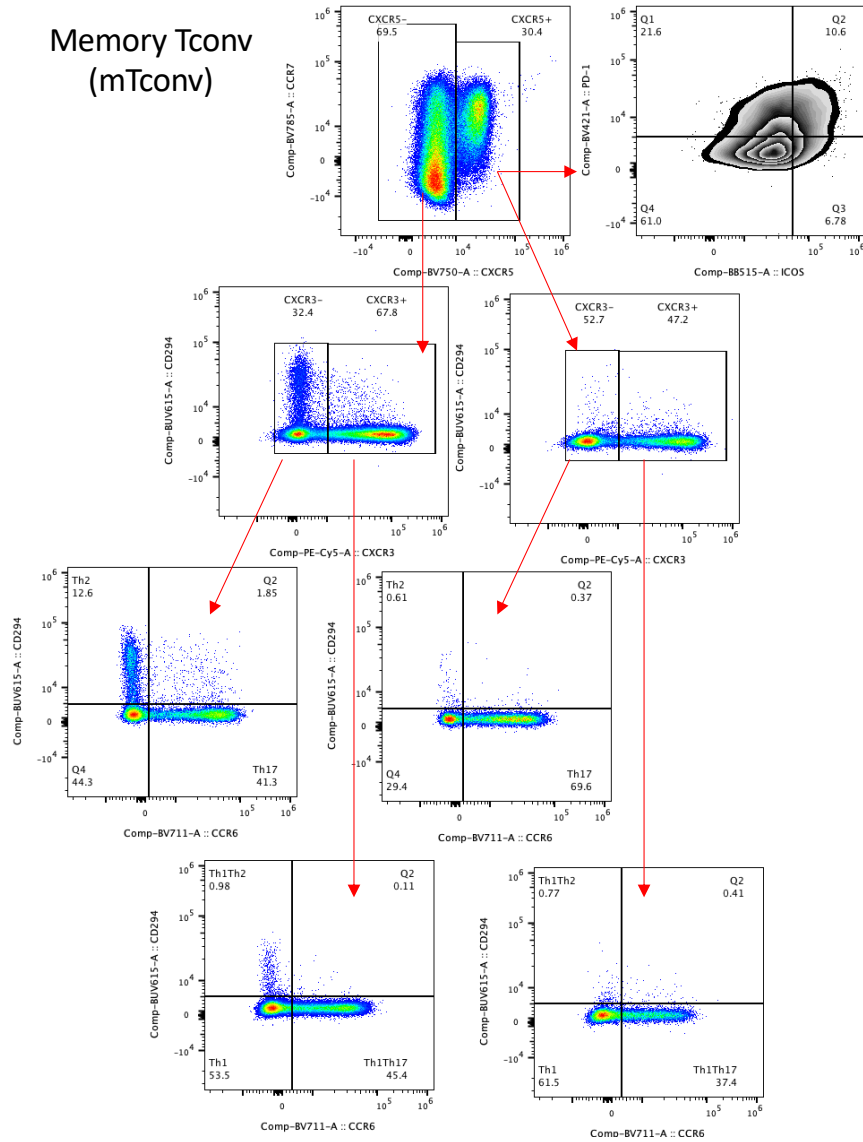

# Memory Treg (mTreg)

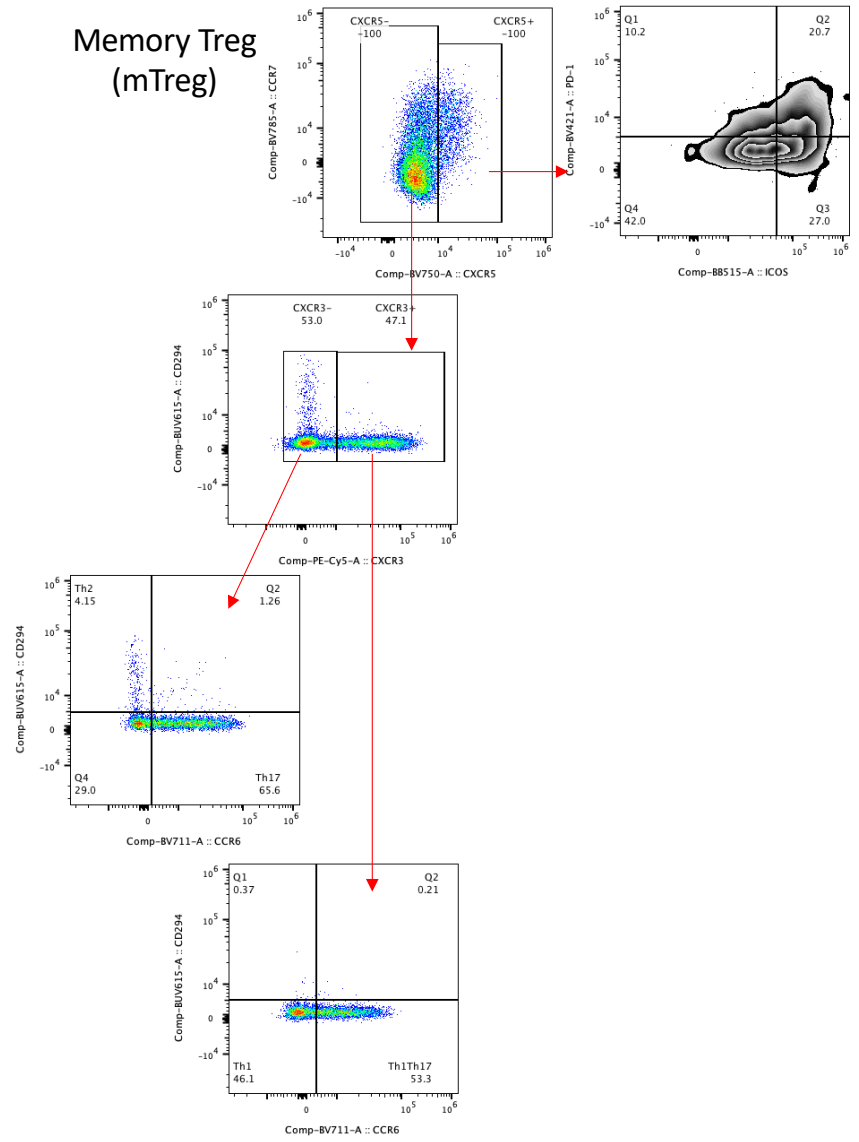

Non-CD3 slide

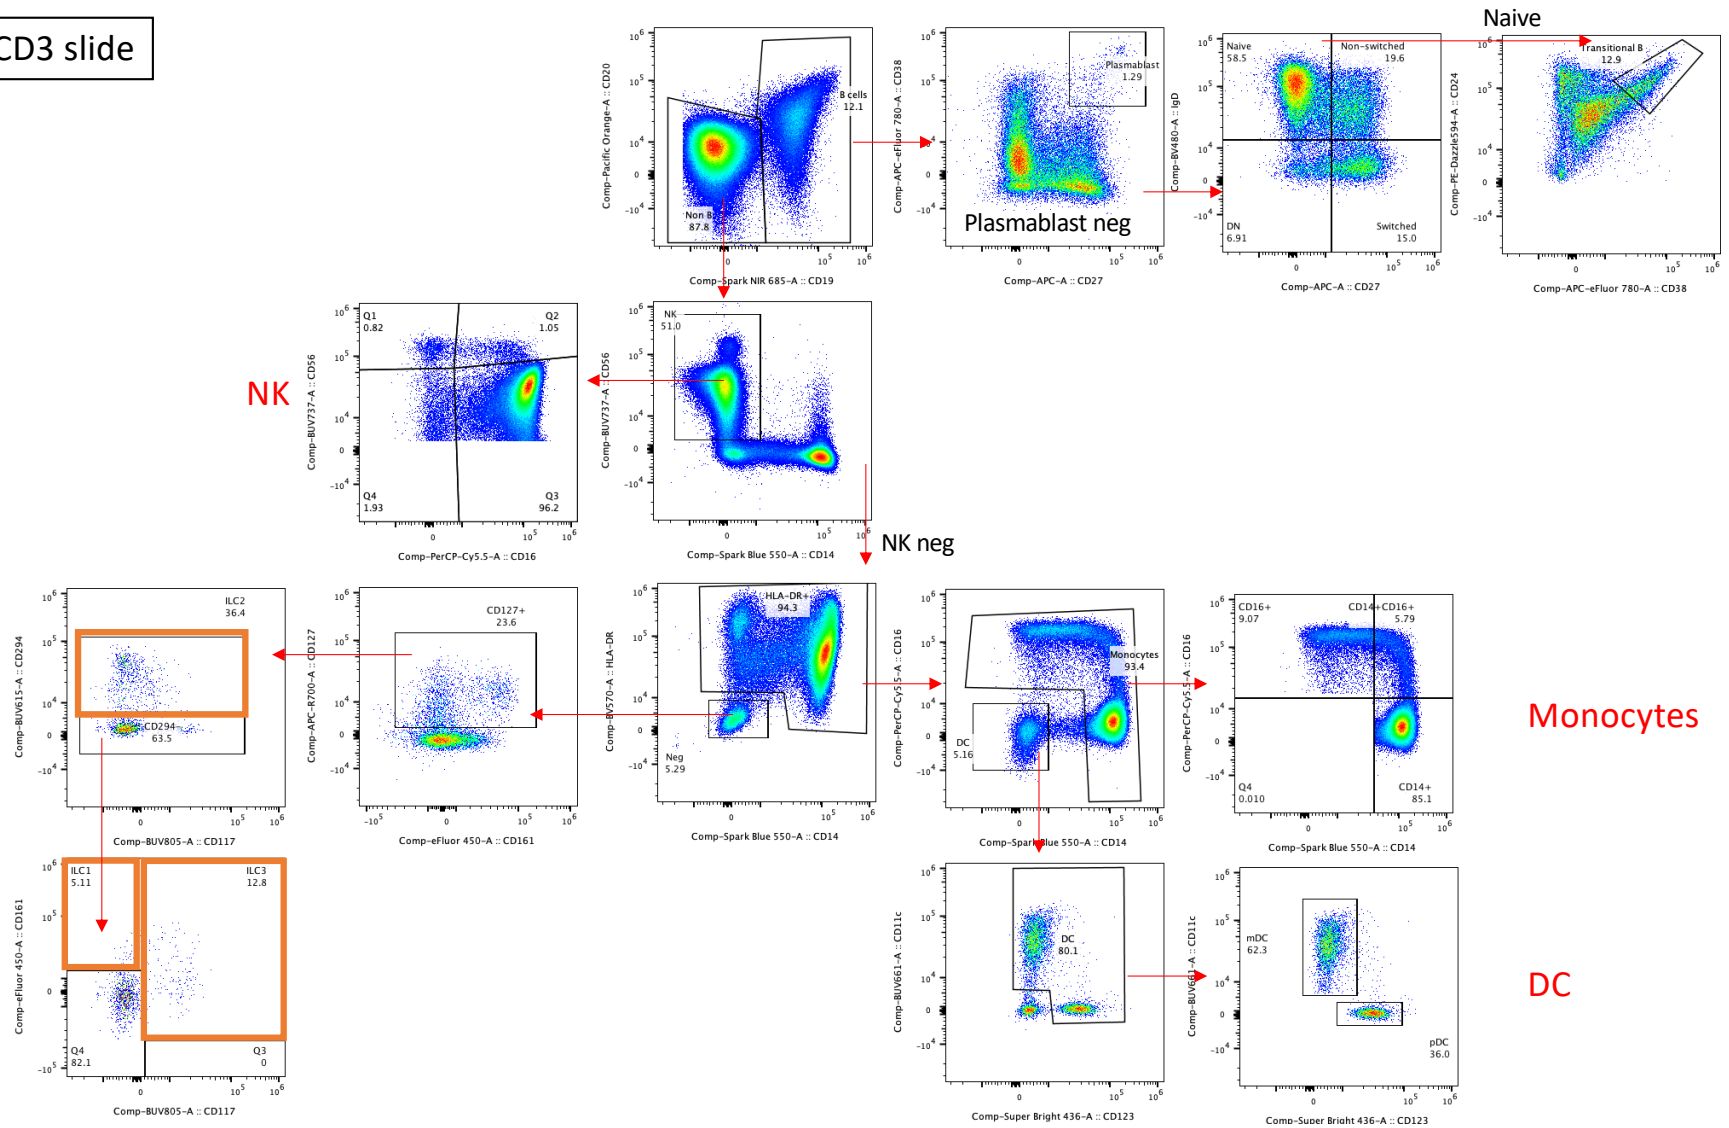

B cells

Monocytes

DC

NK

NK neg

ILC
