# Supplementary material for: Multi-omics analysis reveals drivers of loss of β-cell function after newly diagnosed autoimmune type 1 diabetes: An INNODIA‡ multicenter study
Source: bioRxiv or medRxiv preprint supplement (doi:10.1101/2023.03.22.23287261), 2023-03-28
Supplement: Supplementary file [file media-9.pdf]

**Supplementary Table 1 - Peptides and proteins measured using targeted proteomics.**

| Peptides          | Protein Accession | Protein name                            | Gene   |
|-------------------|-------------------|-----------------------------------------|--------|
| AGFAGDDAPR        | C9JTX5            | Actin, cytoplasmic 1 (Fragment)         | ACTB   |
| AVFPSIVGR         | C9JTX5            | Actin, cytoplasmic 1 (Fragment)         | ACTB   |
| LASPGFPGHEYANDQER | O00187            | Mannan-binding lectin serine protease 2 | MASP2  |
| VLATLCGQESTDTER   | O00187            | Mannan-binding lectin serine protease 2 | MASP2  |
| VTEPISAESGEQVER   | O14791            | Apolipoprotein L1                       | APOL1  |
| EATLQDCPSGPWGK    | O43866            | CD5 antigen-like                        | CD5L   |
| IWLDNVR           | O43866            | CD5 antigen-like                        | CD5L   |
| AFLLTR            | O95445            | Apolipoprotein M                        | APOM   |
| SLTSCLDK          | O95445            | Apolipoprotein M                        | APOM   |
| TLVVHEK           | P00441            | Superoxide dismutase [Cu-Zn]            | SOD1   |
| DDEEFIESNK        | P00450            | Ceruloplasmin                           | CP     |
| DIASGLIGLIICK     | P00450            | Ceruloplasmin                           | CP     |
| TATSEYQTFNPR      | P00734            | Prothrombin                             | F2     |
| GLTLHLK           | P00736            | Complement C1r subcomponent             | C1R    |
| HYEGSTVPEK        | P00738            | Haptoglobin (Zonulin)                   | HP     |
| VVLHPNYSQVDIGLIK  | P00738            | Haptoglobin (Zonulin)                   | HP     |
| NPANPVQ           | H0Y300            | Haptoglobin (Zonulin)                   | HP     |
| NPANPVQR          | H0Y300            | Haptoglobin (Zonulin)                   | HP     |
| FGSGYVSGWGR       | P00740            | Coagulation factor IX                   | F9     |
| SALVLQYLR         | P00740            | Coagulation factor IX                   | F9     |
| NGPLSCGQR         | P00748            | Coagulation factor XII                  | F12    |
| AAVYHHFISDGVR     | P01024            | Complement C3                           | C3     |
| ENSQYQPIK         | P01031            | Complement C5                           | C5     |
| TDAPDLPEENQAR     | P01031            | Complement C5                           | C5     |
| QVVAGLNFR         | P01042            | Kininogen-1                             | KNG1   |
| TVGSDTFYSFK       | P01042            | Kininogen-1                             | KNG1   |
| GIVECCFR          | P01344            | Insulin-like growth factor II           | IGF2   |
| FVYHLSDLCK        | P01591            | Insulin-like growth factor II           | IGJ    |
| SSEDPNEDIVER      | P01591            | Immunoglobulin J chain                  | IGJ    |
| QVSGSVTTDQVQAEAK  | P01871            | Immunoglobulin heavy constant mu        | IGHM   |
| YAATSQVLLPSK      | P01871            | Immunoglobulin heavy constant mu        | IGHM   |
| ICVCDNGK          | P02452            | Collagen alpha-1(I) chain               | COL1A1 |
| VLCDDVICDETK      | P02452            | Collagen alpha-1(I) chain               | COL1A1 |
| DYVSQFEGSALGK     | P02647            | Apolipoprotein A-I                      | APOA1  |
| THLAPYSDELK       | P02647            | Apolipoprotein A-I                      | APOA1  |
| LEEQAQQIR         | P02649            | Apolipoprotein E                        | APOE   |
| LGPLVEQGR         | P02649            | Apolipoprotein E                        | APOE   |
| EFGNTLEDK         | P02654            | Apolipoprotein C-I                      | APOC1  |
| EWFSETFQK         | P02654            | Apolipoprotein C-I                      | APOC1  |
| TAAQNLYEK         | P02655            | Apolipoprotein C-II                     | APOC2  |
| TYLPAVDEK         | P02655            | Apolipoprotein C-II                     | APOC2  |

|                        |        |                                          |          |
|------------------------|--------|------------------------------------------|----------|
| DYWSTVK                | P02656 | Apolipoprotein C-III                     | APOC3    |
| GWVTDGFSSLK            | P02656 | Apolipoprotein C-III                     | APOC3    |
| ESSSHHPGIAEFPSR        | P02671 | Fibrinogen alpha chain                   | FGA      |
| GSESGIFTNTK            | P02671 | Fibrinogen alpha chain                   | FGA      |
| AFVFPK                 | P02741 | C-reactive protein                       | CRP      |
| ESDTSYVSLK             | P02741 | C-reactive protein                       | CRP      |
| GYSIFSYATK             | P02741 | C-reactive protein                       | CRP      |
| ALPTTYEK               | P02748 | Complement component C9                  | C9       |
| FTPTEYNK               | P02748 | Complement component C9                  | C9       |
| LSPIYNLVPVK            | P02748 | Complement component C9                  | C9       |
| AADDTWEPFASGK          | P02766 | Transthyretin                            | TTR      |
| TSESGELHGLTTEEEFVEGIYK | P02766 | Transthyretin                            | TTR      |
| YLYEIAR                | P02768 | Albumin                                  | ALB      |
| HLSLLTTLNLR            | P02774 | Vitamin D-binding protein                | GC       |
| VLEPTLK                | P02774 | Vitamin D-binding protein                | GC       |
| NIQSLEVIGK             | P02775 | Platelet basic protein                   | PPBP     |
| DGAGDVAQVK             | P02787 | Serotransferrin                          | TF       |
| EDPQTFYYAVAVVK         | P02787 | Serotransferrin                          | TF       |
| DSVTGTLPK              | P03952 | Plasma kallikrein                        | KLKB1    |
| IAYGTQGSYGSLR          | P03952 | Plasma kallikrein                        | KLKB1    |
| VSEGNHDIALIK           | P03952 | Plasma kallikrein                        | KLKB1    |
| EELIYEDK               | P04003 | C4b-binding protein alpha chain          | C4BPA    |
| GSSVIHCDADSK           | P04003 | C4b-binding protein alpha chain          | C4BPA    |
| YTCLPGYVR              | P04003 | C4b-binding protein alpha chain          | C4BPA    |
| ADVLTGAGNPVGDK         | P04040 | Catalase                                 | CAT      |
| FSTVAGESGSADTVR        | P04040 | Catalase                                 | CAT      |
| ENFAGEATLQR            | P04114 | Apolipoprotein B-100                     | APOB     |
| EVGTVLSQVYSK           | P04114 | Apolipoprotein B-100                     | APOB     |
| ITENDIQIALDDAK         | P04114 | Apolipoprotein B-100                     | APOB     |
| ADLFYDVEALDLESPK       | P04196 | Histidine-rich glycoprotein              | HRG      |
| DGYLFQLLR              | P04196 | Histidine-rich glycoprotein              | HRG      |
| ATWSGAVLAGR            | P04217 | Alpha-1B-glycoprotein                    | A1BG     |
| SGLSTGWTQLSK           | P04217 | Alpha-1B-glycoprotein                    | A1BG     |
| ILAGPAGDSNVVK          | P04275 | von Willebrand factor                    | VWF      |
| VTVFPIGIGDR            | P04275 | von Willebrand factor                    | VWF      |
| GALQNIIPASTGAAK        | P04406 | Glyceraldehyde-3-phosphate dehydrogenase | GAPDH    |
| LVINGNPITIFQER         | P04406 | Glyceraldehyde-3-phosphate dehydrogenase | GAPDH    |
| APQTGIVDECCFR          | P05019 | Insulin-like growth factor I             | IGF1     |
| GFYFNKPTGYGSSSR        | P05019 | Insulin-like growth factor I             | IGF1     |
| LLDSLPSDTR             | P05155 | Plasma protease C1 inhibitor             | SERPING1 |
| TLYSSSPR               | P05155 | Plasma protease C1 inhibitor             | SERPING1 |
| IANVFTNAFR             | P05164 | Myeloperoxidase                          | MPO      |
| NALALFVLPK             | P05543 | Thyroxine-binding globulin               | SERPINA7 |
| TLEAQLTPR              | P05546 | Heparin cofactor 2                       | SERPIND1 |
| AGALNSNDAFVLK          | P06396 | Gelsolin                                 | GSN      |

|                      |        |                                              |          |
|----------------------|--------|----------------------------------------------|----------|
| TPSAAYLWVGTGASEAEK   | P06396 | Gelsolin                                     | GSN      |
| AVISPGFDVFAK         | P06681 | Complement C2                                | C2       |
| HAFILQDTK            | P06681 | Complement C2                                | C2       |
| ISASAEELR            | P06727 | Apolipoprotein A-IV                          | APOA4    |
| LAPLAEDVR            | P06727 | Apolipoprotein A-IV                          | APOA4    |
| LTQLNLDR             | P07359 | Platelet glycoprotein Ib alpha chain         | GP1BA    |
| LTSPLGALR            | P07359 | Platelet glycoprotein Ib alpha chain         | GP1BA    |
| SLPVSDSVLSGFQER      | P07360 | Complement component C8 gamma chain          | C8G      |
| VQEHLTEDQIFYFPK      | P07360 | Complement component C8 gamma chain          | C8G      |
| STGGAPTFNVTVK        | P07737 | Profilin-1                                   | PFN1     |
| HLVALSPK             | P08185 | Corticosteroid-binding globulin              | SERPINA6 |
| ITQDAQLK             | P08185 | Corticosteroid-binding globulin              | SERPINA6 |
| AFQVWSDVTPLR         | P08253 | 72 kDa type IV collagenase                   | MMP2     |
| GTYSTTVTGR           | P08519 | Apolipoprotein                               | LPA      |
| NPDAVAAPYCYTR        | P08519 | Apolipoprotein                               | LPA      |
| CTSTGWIPAPR          | P08603 | Complement factor H                          | CFH      |
| IDVHLVPDR            | P08603 | Complement factor H                          | CFH      |
| DFLQSLK              | P08697 | Alpha-2-antiplasmin                          | SERPINF2 |
| LFGPDLK              | P08697 | Alpha-2-antiplasmin                          | SERPINF2 |
| AQETSGEEISK          | P08833 | Insulin-like growth factor-binding protein 1 | IGFBP1   |
| LHLDYIGPCK           | P09486 | SPARC                                        | SPARC    |
| TFDSSCHFFATK         | P09486 | SPARC                                        | SPARC    |
| EDTPNSVWEPAK         | P09871 | Complement C1s subcomponent                  | C1S      |
| FFGHGAEDSLADQAANEWGR | PODJI8 | Serum amyloid A-1 protein                    | SAA1     |
| GPGGVWAAEAISDAR      | PODJI8 | Serum amyloid A-1 protein                    | SAA1     |
| GAEDSLADQAANK        | PODJI9 | Serum amyloid A-2 protein                    | SAA2     |
| GPGGAWAAEVISNAR      | PODJI9 | Serum amyloid A-2 protein                    | SAA2     |
| CNPDSNSANCLEEK       | P10124 | Serglycin                                    | SRGN     |
| LRTDLFPK             | P10124 | Serglycin                                    | SRGN     |
| ASSIIDELFQDR         | P10909 | Clusterin                                    | CLU      |
| ITPSYVAFTPEGER       | P11021 | Endoplasmic reticulum chaperone BiP          | HSPA5    |
| NELESYAYSLK          | P11021 | Endoplasmic reticulum chaperone BiP          | HSPA5    |
| FQASVATPR            | P11226 | Mannose-binding protein C                    | MBL2     |
| GFVVAGPSR            | P13671 | Complement component C6                      | C6       |
| IGESIELTCPK          | P13671 | Complement component C6                      | C6       |
| SLGPALLLQK           | P14780 | Matrix metalloproteinase-9                   | MMP9     |
| SVDIWLR              | P15151 | Poliovirus receptor                          | PVR      |
| VLAKPQNTAEVQK        | P15151 | Poliovirus receptor                          | PVR      |
| FECQPGYR             | P16109 | P-selectin                                   | SELP     |
| LEGPNNVECTTSGR       | P16109 | P-selectin                                   | SELP     |
| LEGEVFFATR           | P16112 | Aggrecan core protein                        | ACAN     |
| ETEYGPCR             | P17936 | Insulin-like growth factor-binding protein 3 | IGFBP3   |
| FLNVLSPR             | P17936 | Insulin-like growth factor-binding protein 3 | IGFBP3   |
| SAGSVESPSVSTHR       | P17936 | Insulin-like growth factor-binding protein 3 | IGFBP3   |

|                      |        |                                                                        |        |
|----------------------|--------|------------------------------------------------------------------------|--------|
| LEGEACGVYTPR         | P18065 | Insulin-like growth factor-binding protein 2                           | IGFBP2 |
| LIQGAPTIR            | P18065 | Insulin-like growth factor-binding protein 2                           | IGFBP2 |
| GSFALSFPVESDVAPIAR   | P20742 | Pregnancy zone protein                                                 | PZP    |
| ISEITNIVSK           | P20742 | Pregnancy zone protein                                                 | PZP    |
| AGQSAAGAAPGGGVDTR    | P21333 | Filamin-A                                                              | FLNA   |
| VEPGLGADNSVVR        | P21333 | Filamin-A                                                              | FLNA   |
| WGDEHIPGSPYR         | P21333 | Filamin-A                                                              | FLNA   |
| FLVGPDGPIIMR         | P22352 | Glutathione peroxidase 3                                               | GPX3   |
| AGEVQPELR            | P25311 | Zinc-alpha-2-glycoprotein                                              | AZGP1  |
| EIPAWVPFDPAAQITK     | P25311 | Zinc-alpha-2-glycoprotein                                              | AZGP1  |
| YSLTYITGLSK          | P25311 | Zinc-alpha-2-glycoprotein                                              | AZGP1  |
| SPLNDFQVLR           | P26927 | Hepatocyte growth factor-like protein                                  | MST1   |
| TPFDYCALR            | P26927 | Hepatocyte growth factor-like protein                                  | MST1   |
| GPGGVWAAK            | P35542 | Serum amyloid A-4 protein                                              | SAA4   |
| YLYAR                | P35542 | Serum amyloid A-4 protein                                              | SAA4   |
| LAELPADALGPLQR       | P35858 | Insulin-like growth factor-binding protein complex acid labile subunit | IGFALS |
| LEALPNSLLAPLGR       | P35858 | Insulin-like growth factor-binding protein complex acid labile subunit | IGFALS |
| LEYLLLSR             | P35858 | Insulin-like growth factor-binding protein complex acid labile subunit | IGFALS |
| LSSGLVTAALYGR        | P43251 | Biotinidase                                                            | BTD    |
| WNPCLEPHR            | P43251 | Biotinidase                                                            | BTD    |
| AESPEVCFNEESPK       | P43652 | Afamin                                                                 | AFM    |
| DADPDTFFAK           | P43652 | Afamin                                                                 | AFM    |
| GQCIINSNK            | P43652 | Afamin                                                                 | AFM    |
| FNALQYLR             | P51884 | Lumican                                                                | LUM    |
| ILGPLSYSK            | P51884 | Lumican                                                                | LUM    |
| AVSPPAR              | P54108 | Cysteine-rich secretory protein 3                                      | CRISP3 |
| YEDLYSNCK            | P54108 | Cysteine-rich secretory protein 3                                      | CRISP3 |
| AWFLESK              | P55056 | Apolipoprotein C-IV                                                    | APOC4  |
| ELLETVVNR            | P55056 | Apolipoprotein C-IV                                                    | APOC4  |
| WSLVR                | P55056 | Apolipoprotein C-IV                                                    | APOC4  |
| IPACIAGER            | P59666 | Neutrophil defensin 3                                                  | DEFA3  |
| YGTCIYQGR            | P59666 | Neutrophil defensin 3                                                  | DEFA3  |
| SAVTALWGK            | P68871 | Hemoglobin subunit beta                                                | HBB    |
| VNVDEVGGEALGR        | P68871 | Hemoglobin subunit beta                                                | HBB    |
| ATYIQNYR             | Q01459 | Di-N-acetylchitobiase                                                  | CTBS   |
| STDTSCVNPPTVQNAHILSR | Q03591 | Complement factor H-related protein 1                                  | CFHR1  |
| TGESAEFVCK           | Q03591 | Complement factor H-related protein 1                                  | CFHR1  |
| LEACESLTR            | Q04756 | Hepatocyte growth factor activator                                     | HGFAC  |
| VANYVDWINDR          | Q04756 | Hepatocyte growth factor activator                                     | HGFAC  |
| LTLAPLNSVFK          | Q15582 | Transforming growth factor-beta-induced protein ig-h3                  | TGFBI  |
| GFPGIQGR             | Q15848 | Adiponectin                                                            | ADIPOQ |
| IFYNQNHYDGSTGK       | Q15848 | Adiponectin                                                            | ADIPOQ |

|                    |        |                                                         |         |
|--------------------|--------|---------------------------------------------------------|---------|
| FLPEGCQPLVSSAVDR   | Q86YW5 | Trem-like transcript 1 protein                          | TREML1  |
| VSLNILPPEEEETHK    | Q86YW5 | Trem-like transcript 1 protein                          | TREML1  |
| TLIDFVK            | Q8WXD2 | Secretogranin-3                                         | SCG3    |
| VEYQCQSYVELQGSK    | Q92496 | Complement factor H-related protein 4                   | CFHR4   |
| VYLPWSR            | Q92496 | Complement factor H-related protein 4                   | CFHR4   |
| AIHLDLEEYR         | Q96KN2 | Beta-Ala-His dipeptidase                                | CNDP1   |
| ALEQDLPVNIK        | Q96KN2 | Beta-Ala-His dipeptidase                                | CNDP1   |
| AGLLRPDYALLGHR     | Q96PD5 | N-acetylmuramoyl-L-alanine amidase                      | PGLYRP2 |
| TFTLLDPK           | Q96PD5 | N-acetylmuramoyl-L-alanine amidase                      | PGLYRP2 |
| IFSQETLTK          | Q9UHG3 | Prenylcysteine oxidase 1                                | PCYOX1  |
| SDFYDIVLVATPLNR    | Q9UHG3 | Prenylcysteine oxidase 1                                | PCYOX1  |
| LLGLSLAGK          | Q9Y5Y7 | Lymphatic vessel endothelial hyaluronic acid receptor 1 | LYVE1   |
| LGGNETQVR          | MSRT1  | Isotopically labelled retention time std.               |         |
| ADEGISFR           | MSRT1  | Isotopically labelled retention time std.               |         |
| AEFAEVSK           | MSRT1  | Isotopically labelled retention time std.               |         |
| AVQQPDGLAVLGIFLK   | MSRT1  | Isotopically labelled retention time std.               |         |
| DISLSDYK           | MSRT1  | Isotopically labelled retention time std.               |         |
| DQGGELLSLR         | MSRT1  | Isotopically labelled retention time std.               |         |
| GLFIIDDK           | MSRT1  | Isotopically labelled retention time std.               |         |
| LVNEVTEFAK         | MSRT1  | Isotopically labelled retention time std.               |         |
| SGFSSVSVSR         | MSRT1  | Isotopically labelled retention time std.               |         |
| TDELFQIEGLKEELAYLR | MSRT1  | Isotopically labelled retention time std.               |         |
| YWGVASFLQK         | MSRT1  | Isotopically labelled retention time std.               |         |
