# Supplementary material for: Multi-omics analysis reveals drivers of loss of β-cell function after newly diagnosed autoimmune type 1 diabetes: An INNODIA‡ multicenter study
Source: bioRxiv or medRxiv preprint supplement (doi:10.1101/2023.03.22.23287261), 2023-03-28
Supplement: Supplementary file [file media-10.pdf]

Rat

|             |               |             |             |             |               |            |              |            |            |             |            |
|-------------|---------------|-------------|-------------|-------------|---------------|------------|--------------|------------|------------|-------------|------------|
| let-7a-2-3p | miR-122-5p    | miR-132-3p  | miR-145-5p  | miR-181d-5p | miR-199a-5p   | miR-222-3p | miR-296-3p   | miR-30d-3p | miR-369-3p | miR-484     | miR-873-5p |
| let-7a-5p   | miR-124-3p    | miR-132-5p  | miR-146a-5p | miR-183-5p  | miR-19a-3p    | miR-22-3p  | miR-296-5p   | miR-30d-5p | miR-369-5p | miR-485-5p  | miR-874-3p |
| let-7b-5p   | miR-124-5p    | miR-133a-3p | miR-148b-3p | miR-184     | miR-19b-3p    | miR-22-5p  | miR-29a-3p   | miR-30e-3p | miR-370-3p | miR-487b-3p | miR-92b-3p |
| let-7c-5p   | miR-1249      | miR-133a-5p | miR-150-5p  | miR-185-5p  | miR-200a-3p   | miR-23a-3p | miR-29a-5p   | miR-30e-5p | miR-377-5p | miR-488-5p  | miR-935    |
| let-7d-3p   | miR-125a-3p   | miR-134-5p  | miR-152-3p  | miR-186-5p  | miR-200b-5p   | miR-23a-5p | miR-29b-2-5p | miR-324-5p | miR-379-5p | miR-490-5p  | miR-93-5p  |
| let-7d-5p   | miR-125a-5p   | miR-135a-5p | miR-153-3p  | miR-187-3p  | miR-204-5p    | miR-23b-3p | miR-29b-3p   | miR-32-5p  | miR-381-5p | miR-493-5p  | miR-96-5p  |
| let-7e-3p   | miR-125b-1-3p | miR-135b-3p | miR-154-3p  | miR-188-5p  | miR-208a-5p   | miR-24-3p  | miR-29c-3p   | miR-330-5p | miR-382-3p | miR-532-3p  | miR-99a-5p |
| let-7e-5p   | miR-125b-5p   | miR-135b-5p | miR-154-5p  | miR-18a-5p  | miR-20a-5p    | miR-25-3p  | miR-29c-5p   | miR-331-3p | miR-382-5p | miR-539-5p  | miR-99b-3p |
| let-7f-5p   | miR-127-3p    | miR-136-3p  | miR-15b-3p  | miR-190a-5p | miR-20b-5p    | miR-26a-5p | miR-301a-3p  | miR-339-5p | miR-410-3p | miR-542-3p  | miR-99b-5p |
| let-7i-5p   | miR-128-3p    | miR-136-5p  | miR-15b-5p  | miR-192-5p  | miR-210-3p    | miR-26b-3p | miR-30a-3p   | miR-340-5p | miR-410-5p | miR-568     | miR-93-5p  |
| miR-100-5p  | miR-129-2-3p  | miR-138-5p  | miR-16-5p   | miR-194-5p  | miR-21-5p     | miR-26b-5p | miR-30a-5p   | miR-342-3p | miR-411-5p | miR-652-3p  | miR-93-5p  |
| miR-106b-3p | miR-129-5p    | miR-140-5p  | miR-17-5p   | miR-195-5p  | miR-216a-5p   | miR-27a-3p | miR-30b-5p   | miR-34a-5p | miR-425-5p | miR-708-5p  | miR-93-5p  |
| miR-106b-5p | miR-1306-5p   | miR-141-3p  | miR-181a-5p | miR-196a-5p | miR-216b-5p   | miR-27a-5p | miR-30c-1-3p | miR-34c-5p | miR-433-3p | miR-758-3p  | miR-93-5p  |
| miR-10a-3p  | miR-130a-3p   | miR-142-5p  | miR-181b-5p | miR-196b-5p | miR-219a-2-3p | miR-27b-3p | miR-30c-2-3p | miR-361-5p | miR-433-5p | miR-759     | miR-93-5p  |
| miR-10a-5p  | miR-130b-3p   | miR-144-3p  | miR-181c-5p | miR-199a-3p | miR-221-3p    | miR-28-5p  | miR-30c-5p   | miR-363-5p | miR-455-5p | miR-761     | miR-93-5p  |

Mouse

|             |               |             |             |              |               |              |              |             |             |             |            |
|-------------|---------------|-------------|-------------|--------------|---------------|--------------|--------------|-------------|-------------|-------------|------------|
| let-7a-5p   | miR-1247-5p   | miR-135b-5p | miR-16-5p   | miR-194-5p   | miR-20a-5p    | miR-25-3p    | miR-302d-3p  | miR-339-5p  | miR-409-5p  | miR-495-3p  | miR-759    |
| let-7b-5p   | miR-1251-3p   | miR-138-5p  | miR-17-5p   | miR-196a-5p  | miR-20b-5p    | miR-26a-1-3p | miR-30a-3p   | miR-340-3p  | miR-410-3p  | miR-504-5p  | miR-761    |
| let-7c-5p   | miR-125a-3p   | miR-140-5p  | miR-181a-5p | miR-196b-3p  | miR-210-3p    | miR-26a-5p   | miR-30a-5p   | miR-340-5p  | miR-410-5p  | miR-532-3p  | miR-874-3p |
| let-7d-3p   | miR-125a-5p   | miR-141-3p  | miR-181b-5p | miR-196b-5p  | miR-212-5p    | miR-26b-3p   | miR-30b-5p   | miR-342-3p  | miR-411-3p  | miR-532-5p  | miR-875-5p |
| let-7d-5p   | miR-125b-1-3p | miR-142-5p  | miR-181c-5p | miR-199a-5p  | miR-214-5p    | miR-26b-5p   | miR-30c-1-3p | miR-34a-5p  | miR-411-5p  | miR-539-5p  | miR-877-5p |
| let-7e-3p   | miR-125b-5p   | miR-143-3p  | miR-181d-5p | miR-19a-3p   | miR-216a-5p   | miR-27a-3p   | miR-30c-2-3p | miR-34c-5p  | miR-425-5p  | miR-542-3p  | miR-92b-3p |
| let-7e-5p   | miR-127-3p    | miR-144-3p  | miR-183-3p  | miR-19b-1-5p | miR-216b-5p   | miR-27a-5p   | miR-30c-5p   | miR-361-5p  | miR-431-3p  | miR-551b-3p | miR-93-3p  |
| let-7f-1-3p | miR-127-5p    | miR-146a-5p | miR-183-5p  | miR-19b-3p   | miR-218-2-3p  | miR-27b-3p   | miR-30d-3p   | miR-363-3p  | miR-431-5p  | miR-568     | miR-93-5p  |
| let-7f-5p   | miR-128-3p    | miR-146b-5p | miR-185-5p  | miR-200a-3p  | miR-218-5p    | miR-27b-5p   | miR-30d-5p   | miR-367-3p  | miR-433-3p  | miR-574-3p  | miR-9-3p   |
| let-7g-5p   | miR-129-1-3p  | miR-148a-3p | miR-186-5p  | miR-200a-5p  | miR-219a-2-3p | miR-296-3p   | miR-30e-3p   | miR-369-3p  | miR-433-5p  | miR-574-5p  | miR-9-5p   |
| let-7i-5p   | miR-129-2-3p  | miR-148b-3p | miR-187-3p  | miR-200b-3p  | miR-219b-3p   | miR-296-5p   | miR-30e-5p   | miR-369-5p  | miR-450a-5p | miR-590-3p  | miR-96-5p  |
| miR-100-5p  | miR-129-5p    | miR-149-5p  | miR-188-3p  | miR-200b-5p  | miR-221-3p    | miR-29a-3p   | miR-324-5p   | miR-370-3p  | miR-451a    | miR-590-5p  | miR-99a-5p |
| miR-106b-3p | miR-1298-5p   | miR-150-5p  | miR-188-5p  | miR-200c-3p  | miR-222-3p    | miR-29a-5p   | miR-32-5p    | miR-374b-5p | miR-455-5p  | miR-615-3p  | miR-99b-3p |
| miR-106b-5p | miR-130a-3p   | miR-152-3p  | miR-18a-5p  | miR-200c-5p  | miR-223-3p    | miR-29b-3p   | miR-328-3p   | miR-377-3p  | miR-484     | miR-652-3p  | miR-99b-5p |
| miR-10a-3p  | miR-130b-3p   | miR-153-3p  | miR-190a-5p | miR-204-3p   | miR-22-3p     | miR-29c-3p   | miR-330-5p   | miR-377-5p  | miR-485-5p  | miR-654-3p  | miR-93-3p  |
| miR-10a-5p  | miR-132-3p    | miR-154-3p  | miR-191-5p  | miR-204-5p   | miR-22-5p     | miR-29c-5p   | miR-331-3p   | miR-379-3p  | miR-487b-3p | miR-671-3p  | miR-93-3p  |
| miR-10b-5p  | miR-133a-3p   | miR-154-5p  | miR-192-3p  | miR-205-5p   | miR-23a-3p    | miR-301a-3p  | miR-331-5p   | miR-379-5p  | miR-490-5p  | miR-671-5p  | miR-93-3p  |
| miR-122-5p  | miR-134-5p    | miR-15a-5p  | miR-192-5p  | miR-208a-3p  | miR-23a-5p    | miR-301a-5p  | miR-335-3p   | miR-381-3p  | miR-491-3p  | miR-708-5p  | miR-93-3p  |
| miR-124-3p  | miR-135a-5p   | miR-15b-3p  | miR-193a-3p | miR-208a-5p  | miR-23b-3p    | miR-302a-3p  | miR-335-5p   | miR-382-5p  | miR-491-5p  | miR-744-3p  | miR-93-3p  |
| miR-124-5p  | miR-135b-3p   | miR-15b-5p  | miR-193b-5p | miR-208b-3p  | miR-24-3p     | miR-302b-3p  | miR-338-3p   | miR-409-3p  | miR-494-3p  | miR-744-5p  | miR-93-3p  |

Human

|               |               |             |                |               |              |              |             |              |             |               |             |
|---------------|---------------|-------------|----------------|---------------|--------------|--------------|-------------|--------------|-------------|---------------|-------------|
| let-7a-2-3p   | miR-105-3p    | miR-1197    | miR-1236-5p    | miR-1257      | miR-1273e    | miR-129-2-3p | miR-130a-3p | miR-138-1-3p | miR-147b    | miR-15b-5p    | miR-187-3p  |
| let-7a-3p     | miR-105-5p    | miR-1199-3p | miR-1237-3p    | miR-1258      | miR-1273g-5p | miR-1292-5p  | miR-130a-5p | miR-138-2-3p | miR-148a-3p | miR-16-1-3p   | miR-187-5p  |
| let-7a-5p     | miR-106a-3p   | miR-1200    | miR-1237-5p    | miR-125a-3p   | miR-1273h-5p | miR-1293     | miR-130b-3p | miR-138-5p   | miR-148b-3p | miR-16-5p     | miR-188-3p  |
| let-7b-5p     | miR-106a-5p   | miR-1202    | miR-1238-3p    | miR-125a-5p   | miR-1273j-3p | miR-1294     | miR-130b-5p | miR-139-3p   | miR-149-3p  | miR-17-3p     | miR-188-5p  |
| let-7c-3p     | miR-106b-3p   | miR-1204    | miR-1238-5p    | miR-125b-1-3p | miR-1275     | miR-1295b-3p | miR-1321    | miR-139-5p   | miR-149-5p  | miR-17-5p     | miR-18a-3p  |
| let-7c-5p     | miR-106b-5p   | miR-1205    | miR-1243       | miR-125b-2-3p | miR-1275p    | miR-129-5p   | miR-1322    | miR-140-5p   | miR-150-3p  | miR-181a-2-3p | miR-18a-5p  |
| let-7d-3p     | miR-107       | miR-1206    | miR-124-3p     | miR-125b-5p   | miR-1276     | miR-1296-3p  | miR-1323    | miR-141-3p   | miR-150-5p  | miR-181a-3p   | miR-18b-3p  |
| let-7d-5p     | miR-10a-3p    | miR-1207-3p | miR-1244       | miR-1261      | miR-1277-5p  | miR-1296-5p  | miR-132-3p  | miR-141-5p   | miR-151a-3p | miR-181a-5p   | miR-18b-5p  |
| let-7e-3p     | miR-10a-5p    | miR-1207-5p | miR-1245b-3p   | miR-1262      | miR-1278     | miR-1297     | miR-1324    | miR-142-5p   | miR-152-3p  | miR-181b-3p   | miR-1908-5p |
| let-7e-5p     | miR-10b-3p    | miR-1208    | miR-124-5p     | miR-1263      | miR-1279     | miR-1298-3p  | miR-132-5p  | miR-143-3p   | miR-153-3p  | miR-181b-5p   | miR-1909-3p |
| let-7f-1-3p   | miR-10b-5p    | miR-1224-5p | miR-1247-3p    | miR-126-3p    | miR-128-1-5p | miR-1298-5p  | miR-133a-3p | miR-143-5p   | miR-153-5p  | miR-181c-3p   | miR-1909-5p |
| let-7f-2-3p   | miR-1178-3p   | miR-1225-3p | miR-1247-5p    | miR-1264      | miR-1282     | miR-1299     | miR-133a-5p | miR-144-3p   | miR-1537-3p | miR-181c-5p   | miR-190a-3p |
| let-7f-5p     | miR-1178-5p   | miR-1225-5p | miR-1249       | miR-1265      | miR-128-2-5p | miR-1301-3p  | miR-133b    | miR-144-5p   | miR-1537-5p | miR-181d-3p   | miR-190a-5p |
| let-7g-3p     | miR-1179      | miR-122-5p  | miR-1250-3p    | miR-126-5p    | miR-1283     | miR-1301-5p  | miR-1343-5p | miR-145-3p   | miR-1538    | miR-181d-5p   | miR-190b    |
| let-7g-5p     | miR-1180-3p   | miR-1226-3p | miR-1250-5p    | miR-1267      | miR-128-3p   | miR-1302     | miR-134-3p  | miR-145-5p   | miR-1539    | miR-182-3p    | miR-1910-3p |
| let-7i-5p     | miR-1180-5p   | miR-1227-3p | miR-1251-3p    | miR-1269a     | miR-1285-5p  | miR-1303     | miR-134-5p  | miR-1468-3p  | miR-154-3p  | miR-182-5p    | miR-1910-5p |
| miR-1         | miR-1182      | miR-1228-3p | miR-1252-3p    | miR-1269b     | miR-1287-3p  | miR-1304-3p  | miR-135a-3p | miR-1468-5p  | miR-154-5p  | miR-183-3p    | miR-1911-3p |
| miR-100-3p    | miR-1183      | miR-1229-3p | miR-1252-5p    | miR-1270      | miR-1287-5p  | miR-1304-5p  | miR-135a-5p | miR-146a-3p  | miR-155-3p  | miR-183-5p    | miR-1911-5p |
| miR-100-5p    | miR-1184      | miR-1229-5p | miR-1253       | miR-1271-5p   | miR-1288-3p  | miR-1305     | miR-135b-3p | miR-146a-5p  | miR-155-5p  | miR-184       | miR-1912    |
| miR-101-3p    | miR-1185-1-3p | miR-1231    | miR-1254       | miR-1272      | miR-1289     | miR-1306-3p  | miR-135b-5p | miR-146b-3p  | miR-1587    | miR-185-3p    | miR-1913    |
| miR-101-5p    | miR-1185-2-3p | miR-1233-3p | miR-1255b-2-3p | miR-1273a     | miR-1290     | miR-1306-5p  | miR-136-3p  | miR-146b-5p  | miR-15a-3p  | miR-185-5p    | miR-191-3p  |
| miR-103a-2-5p | miR-1185-5p   | miR-1234-3p | miR-1256       | miR-1273c     | miR-1291     | miR-1307-3p  | miR-136-5p  | miR-1471     | miR-15a-5p  | miR-186-3p    | miR-1914-3p |
| miR-103a-3p   | miR-1193      | miR-1236-3p | miR-1256       | miR-1273d     | miR-1291-3p  | miR-1307-5p  | miR-137     | miR-147a     | miR-15b-3p  | miR-186-5p    | miR-1914-5p |

# Gene List

## HTG EdgeSeq

### miRNA Whole Transcriptome Assay

#### Human Continued

|              |               |              |              |             |             |               |             |            |              |               |              |
|--------------|---------------|--------------|--------------|-------------|-------------|---------------|-------------|------------|--------------|---------------|--------------|
| miR-1915-3p  | miR-2115-3p   | miR-27b-3p   | miR-3130-3p  | miR-3189-5p | miR-3607-3p | miR-3682-5p   | miR-383-5p  | miR-4255   | miR-432-3p   | miR-4471      | miR-4524b-5p |
| miR-1915-5p  | miR-2115-5p   | miR-27b-5p   | miR-3131     | miR-3191-3p | miR-3607-5p | miR-3683      | miR-384     | miR-425-5p | miR-4324     | miR-4472      | miR-4525     |
| miR-191-5p   | miR-211-5p    | miR-28-5p    | miR-3132     | miR-3191-5p | miR-3609    | miR-3684      | miR-3907    | miR-4256   | miR-4325     | miR-4473      | miR-452-5p   |
| miR-192-3p   | miR-2116-3p   | miR-2861     | miR-3133     | miR-3192-3p | miR-3611    | miR-3685      | miR-3908    | miR-4257   | miR-4325-5p  | miR-4474-3p   | miR-4527     |
| miR-192-5p   | miR-2116-5p   | miR-2909     | miR-3134     | miR-3192-5p | miR-3612    | miR-3686      | miR-3909    | miR-4259   | miR-4326     | miR-4475      | miR-4528     |
| miR-193a-3p  | miR-2117      | miR-296-3p   | miR-3135a    | miR-3193    | miR-3613-3p | miR-3687      | miR-3910    | miR-4261   | miR-4327     | miR-4476      | miR-4530     |
| miR-193a-5p  | miR-212-3p    | miR-296-5p   | miR-3136-5p  | miR-3197    | miR-3613-5p | miR-3688-5p   | miR-3912-3p | miR-4262   | miR-4328     | miR-4477a     | miR-4531     |
| miR-193b-3p  | miR-212-5p    | miR-297      | miR-3137     | miR-3198    | miR-361-3p  | miR-3689a-3p  | miR-3912-5p | miR-4263   | miR-4329     | miR-4477b     | miR-4533     |
| miR-193b-5p  | miR-21-3p     | miR-298      | miR-3138     | miR-3199    | miR-3614-3p | miR-3689a-5p  | miR-3913-5p | miR-4264   | miR-4330     | miR-4478      | miR-4534     |
| miR-194-3p   | miR-214-5p    | miR-299-3p   | miR-3140-3p  | miR-3200-5p | miR-3614-5p | miR-3689b-3p  | miR-3914    | miR-4265   | miR-433-3p   | miR-4478      | miR-4535     |
| miR-194-5p   | miR-215-3p    | miR-299-5p   | miR-3140-5p  | miR-3201    | miR-361-5p  | miR-3689d     | miR-3915    | miR-4266   | miR-433-5p   | miR-4480      | miR-4536-5p  |
| miR-195-3p   | miR-215-5p    | miR-29a-3p   | miR-3141     | miR-3202    | miR-3616-3p | miR-3689f     | miR-3916    | miR-4267   | miR-4417     | miR-4481      | miR-4537     |
| miR-195-5p   | miR-21-5p     | miR-29a-5p   | miR-3142     | miR-320a    | miR-3616-5p | miR-3690      | miR-3917    | miR-4268   | miR-4419a    | miR-4482-3p   | miR-4538     |
| miR-196a-3p  | miR-216a-3p   | miR-29b-1-5p | miR-3143     | miR-320b    | miR-3617-3p | miR-3691-3p   | miR-3919    | miR-4269   | miR-4419b    | miR-4482-5p   | miR-4539     |
| miR-196a-5p  | miR-216a-5p   | miR-29b-2-5p | miR-3144-3p  | miR-320c    | miR-3617-5p | miR-3691-5p   | miR-3920    | miR-4270   | miR-4420     | miR-4483      | miR-4540     |
| miR-196b-3p  | miR-216b-3p   | miR-29b-3p   | miR-3144-5p  | miR-320d    | miR-3618    | miR-3692-3p   | miR-3921    | miR-4271   | miR-4421     | miR-4484      | miR-454-3p   |
| miR-196b-5p  | miR-216b-5p   | miR-29c-3p   | miR-3145-3p  | miR-320e    | miR-3619-3p | miR-3692-5p   | miR-3922-3p | miR-4272   | miR-4422     | miR-4486      | miR-454-5p   |
| miR-197-3p   | miR-217       | miR-29c-5p   | miR-3145-5p  | miR-323a-3p | miR-3619-5p | miR-369-3p    | miR-3922-5p | miR-4273   | miR-4423-3p  | miR-4487      | miR-455-3p   |
| miR-197-5p   | miR-218-1-3p  | miR-300      | miR-3146     | miR-323a-5p | miR-3620-3p | miR-369-5p    | miR-3923    | miR-4274   | miR-4423-5p  | miR-4489      | miR-455-5p   |
| miR-1976     | miR-218-2-3p  | miR-301a-3p  | miR-3147     | miR-323b-3p | miR-362-3p  | miR-370-3p    | miR-3924    | miR-4275   | miR-4424     | miR-4490      | miR-4632-3p  |
| miR-198      | miR-218-5p    | miR-301a-5p  | miR-3148     | miR-323b-5p | miR-362-5p  | miR-370-5p    | miR-3925-5p | miR-4276   | miR-4425     | miR-4491      | miR-4632-5p  |
| miR-199a-3p  | miR-219a-1-3p | miR-301b     | miR-3149     | miR-32-3p   | miR-363-3p  | miR-3713      | miR-3926    | miR-4277   | miR-4426     | miR-4493      | miR-4636     |
| miR-199a-5p  | miR-219a-2-3p | miR-302a-3p  | miR-3150b-5p | miR-324-3p  | miR-363-5p  | miR-3714      | miR-3927-5p | miR-4278   | miR-4427     | miR-4494      | miR-4637     |
| miR-199b-5p  | miR-219b-3p   | miR-302a-5p  | miR-3152-3p  | miR-324-5p  | miR-3646    | miR-371b-3p   | miR-3928-3p | miR-4279   | miR-4428     | miR-4495      | miR-4638-5p  |
| miR-19a-3p   | miR-221-3p    | miR-302b-3p  | miR-3152-5p  | miR-325     | miR-3648    | miR-371b-5p   | miR-3928-5p | miR-4280   | miR-4429     | miR-4496      | miR-4639-3p  |
| miR-19a-5p   | miR-221-5p    | miR-302b-5p  | miR-3153     | miR-325-5p  | miR-3649    | miR-372-3p    | miR-3929    | miR-4282   | miR-4430     | miR-4498      | miR-4639-5p  |
| miR-19b-1-5p | miR-222-3p    | miR-302c-3p  | miR-3154     | miR-326     | miR-3650    | miR-372-5p    | miR-3934-3p | miR-4283   | miR-4431     | miR-4499      | miR-4640-3p  |
| miR-19b-2-5p | miR-222-5p    | miR-302c-5p  | miR-3155a    | miR-328-3p  | miR-3652    | miR-373-3p    | miR-3934-5p | miR-4287   | miR-4432     | miR-449a      | miR-4641     |
| miR-19b-3p   | miR-223-3p    | miR-302d-3p  | miR-3155b    | miR-329-3p  | miR-3653    | miR-373-5p    | miR-3935    | miR-4288   | miR-4433b-5p | miR-449b-3p   | miR-4642     |
| miR-200a-3p  | miR-223-5p    | miR-302d-5p  | miR-3156-5p  | miR-329-5p  | miR-3654    | miR-374a-3p   | miR-3936    | miR-4289   | miR-4434     | miR-449b-5p   | miR-4643     |
| miR-200a-5p  | miR-22-3p     | miR-302e     | miR-3157-3p  | miR-330-3p  | miR-3655    | miR-374b-3p   | miR-3937    | miR-429    | miR-4435     | miR-449c-3p   | miR-4644     |
| miR-200b-3p  | miR-224-3p    | miR-302f     | miR-3157-5p  | miR-330-5p  | miR-3657    | miR-374b-5p   | miR-3938    | miR-4290   | miR-4436a    | miR-449c-5p   | miR-4645-3p  |
| miR-200b-5p  | miR-224-5p    | miR-3064-3p  | miR-3158-5p  | miR-331-3p  | miR-3658    | miR-374c-5p   | miR-3939    | miR-4291   | miR-4436b-3p | miR-4500      | miR-4646-3p  |
| miR-200c-3p  | miR-22-5p     | miR-3064-5p  | miR-3159     | miR-331-5p  | miR-3659    | miR-375       | miR-3940-5p | miR-4292   | miR-4437     | miR-4501      | miR-4646-5p  |
| miR-200c-5p  | miR-2276-3p   | miR-30a-3p   | miR-31-5p    | miR-335-3p  | miR-365a-3p | miR-376a-2-5p | miR-3941    | miR-4293   | miR-4438     | miR-4502      | miR-4647     |
| miR-202-3p   | miR-2276-5p   | miR-30a-5p   | miR-3161     | miR-335-5p  | miR-365a-5p | miR-376a-3p   | miR-3942-5p | miR-4294   | miR-4439     | miR-4503      | miR-4648     |
| miR-202-5p   | miR-2278      | miR-30b-3p   | miR-3162-5p  | miR-337-3p  | miR-365b-5p | miR-376a-5p   | miR-3943    | miR-4295   | miR-4440     | miR-4504      | miR-4649-3p  |
| miR-203b-3p  | miR-2355-3p   | miR-30b-5p   | miR-3163     | miR-337-5p  | miR-3660    | miR-376b-3p   | miR-3944-5p | miR-4296   | miR-4441     | miR-4505      | miR-4649-5p  |
| miR-203b-5p  | miR-2355-5p   | miR-30c-1-3p | miR-3164     | miR-338-3p  | miR-3661    | miR-376b-5p   | miR-3945    | miR-4297   | miR-4442     | miR-4506      | miR-4650-3p  |
| miR-204-3p   | miR-2392      | miR-30c-2-3p | miR-3165     | miR-339-3p  | miR-3662    | miR-376c-3p   | miR-3973    | miR-4299   | miR-4444     | miR-4507      | miR-4652-3p  |
| miR-204-5p   | miR-23a-3p    | miR-30c-5p   | miR-3166     | miR-339-5p  | miR-3663-5p | miR-376c-5p   | miR-3974    | miR-4300   | miR-4446-3p  | miR-4509      | miR-4652-5p  |
| miR-2052     | miR-23a-5p    | miR-30d-3p   | miR-3167     | miR-33a-3p  | miR-3664-5p | miR-377-3p    | miR-3975    | miR-4301   | miR-4446-5p  | miR-450a-1-3p | miR-4653-3p  |
| miR-2053     | miR-23b-3p    | miR-30d-5p   | miR-3169     | miR-33a-5p  | miR-3666    | miR-377-5p    | miR-3976    | miR-4302   | miR-4447     | miR-450a-2-3p | miR-4653-5p  |
| miR-205-3p   | miR-23b-5p    | miR-30e-3p   | miR-3170     | miR-33b-3p  | miR-3667-3p | miR-378a-3p   | miR-3977    | miR-4303   | miR-4449     | miR-450a-5p   | miR-4654     |
| miR-2054     | miR-23c       | miR-30e-5p   | miR-3171     | miR-33b-5p  | miR-3667-5p | miR-378b      | miR-3978    | miR-4304   | miR-4450     | miR-450b-3p   | miR-4655-3p  |
| miR-205-5p   | miR-24-2-5p   | miR-3115     | miR-3174     | miR-340-3p  | miR-3668    | miR-378c      | miR-409-3p  | miR-4305   | miR-4451     | miR-450b-5p   | miR-4655-5p  |
| miR-206      | miR-24-3p     | miR-3116     | miR-3175     | miR-340-5p  | miR-3670    | miR-378d      | miR-409-5p  | miR-4306   | miR-4452     | miR-4510      | miR-4656     |
| miR-208a-3p  | miR-2467-3p   | miR-3117-5p  | miR-3176     | miR-342-3p  | miR-3671    | miR-378e      | miR-410-3p  | miR-4307   | miR-4453     | miR-4511      | miR-4657     |
| miR-208a-5p  | miR-2467-5p   | miR-3118     | miR-3177-3p  | miR-342-5p  | miR-3672    | miR-378f      | miR-410-5p  | miR-4308   | miR-4455     | miR-4512      | miR-4658     |
| miR-208b-3p  | miR-25-3p     | miR-3119     | miR-3177-5p  | miR-345-3p  | miR-367-3p  | miR-378g      | miR-411-3p  | miR-4309   | miR-4456     | miR-4513      | miR-4659a-5p |
| miR-208b-5p  | miR-25-5p     | miR-3121-5p  | miR-3179     | miR-345-5p  | miR-3674    | miR-378h      | miR-411-5p  | miR-4310   | miR-4457     | miR-4514      | miR-4659b-5p |
| miR-20a-3p   | miR-2681-3p   | miR-3122     | miR-3180     | miR-346     | miR-3675-3p | miR-378i      | miR-412-3p  | miR-4311   | miR-4458     | miR-4515      | miR-466      |
| miR-20a-5p   | miR-2681-5p   | miR-3123     | miR-3180-3p  | miR-34a-3p  | miR-3675-5p | miR-378j      | miR-412-5p  | miR-4312   | miR-4459     | miR-4517      | miR-4660     |
| miR-20b-3p   | miR-2682-3p   | miR-3124-3p  | miR-3182     | miR-34a-5p  | miR-367-5p  | miR-379-3p    | miR-421     | miR-431-3p | miR-4460     | miR-4518      | miR-4661-5p  |
| miR-20b-5p   | miR-2682-5p   | miR-3124-5p  | miR-3184-3p  | miR-34b-3p  | miR-3677-5p | miR-379-5p    | miR-422a    | miR-4314   | miR-4461     | miR-4519      | miR-4662a-3p |
| miR-210-3p   | miR-26a-1-3p  | miR-3125     | miR-3185     | miR-34b-5p  | miR-3678-3p | miR-380-3p    | miR-424-3p  | miR-4315   | miR-4462     | miR-451a      | miR-4663     |
| miR-210-5p   | miR-26a-2-3p  | miR-3126-3p  | miR-3186-3p  | miR-34c-3p  | miR-3679-3p | miR-380-5p    | miR-424-5p  | miR-431-5p | miR-4463     | miR-451b      | miR-4664-3p  |
| miR-2110     | miR-26a-5p    | miR-3126-5p  | miR-3186-5p  | miR-34c-5p  | miR-3679-5p | miR-381-3p    | miR-4251    | miR-4317   | miR-4464     | miR-4520a-5p  | miR-4664-5p  |
| miR-2113     | miR-26b-3p    | miR-3127-3p  | miR-3187-3p  | miR-3405-3p | miR-3680-3p | miR-381-5p    | miR-4252    | miR-4318   | miR-4465     | miR-4521      | miR-4665-5p  |
| miR-211-3p   | miR-26b-5p    | miR-3127-5p  | miR-3187-5p  | miR-3605-5p | miR-3680-5p | miR-382-3p    | miR-4253    | miR-4319   | miR-4467     | miR-4522      | miR-4666a-5p |
| miR-2114-3p  | miR-27a-3p    | miR-3128     | miR-3188     | miR-3606-3p | miR-3681-5p | miR-382-5p    | miR-425-3p  | miR-4320   | miR-4468     | miR-452-3p    | miR-4666b    |
| miR-2114-5p  | miR-27a-5p    | miR-3129-3p  | miR-3189-3p  | miR-3606-5p | miR-3682-3p | miR-383-3p    | miR-4254    | miR-4322   | miR-4470     | miR-4524a-5p  | miR-4667-3p  |

Human Continued

|             |             |             |              |             |               |             |            |              |              |              |              |
|-------------|-------------|-------------|--------------|-------------|---------------|-------------|------------|--------------|--------------|--------------|--------------|
| miR-4667-5p | miR-4719    | miR-4770    | miR-495-5p   | miR-513a-3p | miR-543       | miR-5581-3p | miR-577    | miR-6132     | miR-6511b-3p | miR-6735-3p  | miR-6770-3p  |
| miR-4668-3p | miR-4720-3p | miR-4771    | miR-496      | miR-513a-5p | miR-544a      | miR-5581-5p | miR-578    | miR-6133     | miR-6513-3p  | miR-6735-5p  | miR-6770-5p  |
| miR-4668-5p | miR-4720-5p | miR-4772-5p | miR-497-3p   | miR-513b-3p | miR-544b      | miR-5582-3p | miR-579-3p | miR-6134     | miR-6513-5p  | miR-6736-3p  | miR-6771-3p  |
| miR-4669    | miR-4721    | miR-4773    | miR-498      | miR-513b-5p | miR-545-3p    | miR-5582-5p | miR-579-5p | miR-614      | miR-651-3p   | miR-6736-5p  | miR-6771-5p  |
| miR-4670-5p | miR-4722-3p | miR-4774-3p | miR-499-5p   | miR-513c-3p | miR-545-5p    | miR-5583-5p | miR-580-3p | miR-615-3p   | miR-6514-3p  | miR-6737-3p  | miR-6772-3p  |
| miR-4671-3p | miR-4722-5p | miR-4774-5p | miR-499b-3p  | miR-513c-5p | miR-548ab     | miR-5584-3p | miR-580-5p | miR-616-3p   | miR-6514-5p  | miR-6737-5p  | miR-6772-5p  |
| miR-4671-5p | miR-4723-3p | miR-4775    | miR-500-5p   | miR-514a-3p | miR-548ad     | miR-5584-5p | miR-581    | miR-6165     | miR-6515-3p  | miR-6738-3p  | miR-6773-3p  |
| miR-4672    | miR-4723-5p | miR-4777-3p | miR-5001-3p  | miR-514a-5p | miR-548ae     | miR-5585-3p | miR-582-5p | miR-616-5p   | miR-6515-5p  | miR-6738-5p  | miR-6773-5p  |
| miR-4673    | miR-4724-3p | miR-4777-5p | miR-5001-5p  | miR-514b-3p | miR-548ag     | miR-5585-5p | miR-583    | miR-617      | miR-651-5p   | miR-6739-3p  | miR-6774-3p  |
| miR-4675    | miR-4725-3p | miR-4778-3p | miR-5002-3p  | miR-514b-5p | miR-548ak     | miR-5586-3p | miR-584-3p | miR-618      | miR-6516-3p  | miR-6739-5p  | miR-6774-5p  |
| miR-4676-3p | miR-4725-5p | miR-4779    | miR-5002-5p  | miR-515-3p  | miR-548al     | miR-5586-5p | miR-584-5p | miR-619-3p   | miR-6516-5p  | miR-6740-3p  | miR-6775-3p  |
| miR-4677-3p | miR-4726-3p | miR-4780    | miR-5003-3p  | miR-515-5p  | miR-548an     | miR-5587-3p | miR-585-3p | miR-620      | miR-652-3p   | miR-6740-5p  | miR-6775-5p  |
| miR-4677-5p | miR-4726-5p | miR-4781-3p | miR-5003-5p  | miR-516a-3p | miR-548ao-3p  | miR-5588-5p | miR-586    | miR-621      | miR-652-5p   | miR-6741-3p  | miR-6776-3p  |
| miR-4678    | miR-4727-3p | miR-4781-5p | miR-5004-3p  | miR-516a-5p | miR-548ao-5p  | miR-5589-3p | miR-587    | miR-622      | miR-653-3p   | miR-6741-5p  | miR-6776-5p  |
| miR-4679    | miR-4727-5p | miR-4782-5p | miR-5004-5p  | miR-516b-5p | miR-548ar-3p  | miR-5589-5p | miR-588    | miR-623      | miR-654-3p   | miR-6742-3p  | miR-6776-3p  |
| miR-4680-3p | miR-4728-3p | miR-4783-3p | miR-5006-3p  | miR-517-5p  | miR-548as-3p  | miR-559     | miR-589-3p | miR-624-3p   | miR-654-5p   | miR-6742-5p  | miR-6778-5p  |
| miR-4680-5p | miR-4728-5p | miR-4784    | miR-5006-5p  | miR-517a-3p | miR-548au-3p  | miR-5590-5p | miR-589-5p | miR-624-5p   | miR-655-3p   | miR-6744-3p  | miR-6779-3p  |
| miR-4681    | miR-4729    | miR-4786-3p | miR-5007-3p  | miR-517c-3p | miR-548av-5p  | miR-561-3p  | miR-590-3p | miR-625-5p   | miR-655-5p   | miR-6744-5p  | miR-6779-5p  |
| miR-4682    | miR-4730    | miR-4786-5p | miR-5007-5p  | miR-5186    | miR-548aw     | miR-561-5p  | miR-590-5p | miR-626      | miR-656-3p   | miR-6745     | miR-6780a-3p |
| miR-4683    | miR-4731-3p | miR-4788    | miR-5008-5p  | miR-5187-3p | miR-548ax     | miR-562     | miR-591    | miR-627-3p   | miR-656-5p   | miR-6746-5p  | miR-6780a-5p |
| miR-4684-3p | miR-4731-5p | miR-4789-3p | miR-5009-3p  | miR-5187-5p | miR-548ay-3p  | miR-563     | miR-592    | miR-628-5p   | miR-657      | miR-6747-3p  | miR-6780b-3p |
| miR-4684-5p | miR-4732-3p | miR-4789-5p | miR-5009-5p  | miR-5188    | miR-548ay-5p  | miR-564     | miR-593-3p | miR-629-5p   | miR-658      | miR-6747-5p  | miR-6780b-5p |
| miR-4685-3p | miR-4732-5p | miR-4790-3p | miR-500a-3p  | miR-5189-3p | miR-548az-5p  | miR-566     | miR-593-5p | miR-630      | miR-660-3p   | miR-6748-3p  | miR-6781-3p  |
| miR-4685-5p | miR-4733-3p | miR-4790-5p | miR-500a-5p  | miR-5189-5p | miR-548b-3p   | miR-567     | miR-595    | miR-631      | miR-660-5p   | miR-6748-5p  | miR-6781-5p  |
| miR-4686    | miR-4734    | miR-4791    | miR-500b-3p  | miR-518b    | miR-548b-5p   | miR-568     | miR-597-3p | miR-632      | miR-661      | miR-6750-3p  | miR-6782-3p  |
| miR-4687-3p | miR-4735-5p | miR-4793-3p | miR-500b-5p  | miR-518c-3p | miR-548ba     | miR-5680    | miR-597-5p | miR-633      | miR-662      | miR-6750-5p  | miR-6782-5p  |
| miR-4688    | miR-4736    | miR-4793-5p | miR-5010-3p  | miR-5190    | miR-548d-5p   | miR-5682    | miR-598-3p | miR-634      | miR-663b     | miR-6751-3p  | miR-6783-3p  |
| miR-4689    | miR-4737    | miR-4794    | miR-5010-5p  | miR-5191    | miR-548e-3p   | miR-5684    | miR-598-5p | miR-635      | miR-664a-3p  | miR-6751-5p  | miR-6783-5p  |
| miR-4690-3p | miR-4738-3p | miR-4795-3p | miR-5011-5p  | miR-5192    | miR-548e-5p   | miR-5685    | miR-600    | miR-637      | miR-664a-5p  | miR-6752-5p  | miR-6784-5p  |
| miR-4690-5p | miR-4738-5p | miR-4795-5p | miR-501-3p   | miR-5193    | miR-548f-3p   | miR-5687    | miR-601    | miR-640      | miR-664b-3p  | miR-6753-3p  | miR-6785-3p  |
| miR-4691-3p | miR-4742-3p | miR-4796-5p | miR-501-5p   | miR-5194    | miR-548h-5p   | miR-5688    | miR-604    | miR-641      | miR-664b-5p  | miR-675-3p   | miR-6786-3p  |
| miR-4691-5p | miR-4742-5p | miR-4798-3p | miR-502-3p   | miR-5195-3p | miR-548j-3p   | miR-5689    | miR-605-3p | miR-642a-5p  | miR-668-3p   | miR-6754-3p  | miR-6787-3p  |
| miR-4692    | miR-4743-3p | miR-4798-5p | miR-502-5p   | miR-5195-5p | miR-548k      | miR-569     | miR-605-5p | miR-642b-5p  | miR-668-5p   | miR-6754-5p  | miR-6787-5p  |
| miR-4693-3p | miR-4743-5p | miR-4799-5p | miR-503-3p   | miR-5196-3p | miR-548l      | miR-5690    | miR-606    | miR-643      | miR-670-3p   | miR-6755-3p  | miR-6788-3p  |
| miR-4693-5p | miR-4744    | miR-4800-3p | miR-503-5p   | miR-5196-5p | miR-548m      | miR-5691    | miR-6069   | miR-644a     | miR-670-5p   | miR-6755-5p  | miR-6789-3p  |
| miR-4694-5p | miR-4745-3p | miR-4800-5p | miR-504-3p   | miR-5197-3p | miR-548s      | miR-5692a   | miR-607    | miR-645      | miR-671-3p   | miR-675-5p   | miR-6789-5p  |
| miR-4695-3p | miR-4746-5p | miR-4801    | miR-504-5p   | miR-5197-5p | miR-548t-5p   | miR-5692b   | miR-6071   | miR-646      | miR-6715b-3p | miR-6756-5p  | miR-6790-5p  |
| miR-4695-5p | miR-4747-3p | miR-4802-3p | miR-5047     | miR-519a-3p | miR-548v      | miR-5692c   | miR-6072   | miR-647      | miR-671-5p   | miR-6757-3p  | miR-6791-3p  |
| miR-4696    | miR-4747-5p | miR-4802-5p | miR-505-3p   | miR-519b-3p | miR-548w      | miR-5693    | miR-6073   | miR-648      | miR-6716-3p  | miR-6757-5p  | miR-6791-5p  |
| miR-4697-3p | miR-4748    | miR-4803    | miR-505-5p   | miR-519c-3p | miR-548x-3p   | miR-5694    | miR-6075   | miR-649      | miR-6716-5p  | miR-6758-3p  | miR-6792-3p  |
| miR-4697-5p | miR-4750-5p | miR-4804-5p | miR-506-3p   | miR-519d-3p | miR-548y      | miR-5695    | miR-6076   | miR-6499-3p  | miR-6717-5p  | miR-6758-5p  | miR-6792-5p  |
| miR-4698    | miR-4751    | miR-484     | miR-506-5p   | miR-519e-3p | miR-549a      | miR-5696    | miR-6078   | miR-6499-5p  | miR-6718-5p  | miR-6759-3p  | miR-6793-5p  |
| miR-4699-3p | miR-4752    | miR-485-3p  | miR-507      | miR-519e-5p | miR-550a-3-5p | miR-5697    | miR-6079   | miR-650      | miR-6719-3p  | miR-6759-5p  | miR-6794-3p  |
| miR-4699-5p | miR-4753-3p | miR-485-5p  | miR-508-3p   | miR-520a-5p | miR-550a-5p   | miR-5698    | miR-608    | miR-6500-3p  | miR-6720-3p  | miR-6760-3p  | miR-6794-5p  |
| miR-4700-5p | miR-4753-5p | miR-486-5p  | miR-508-5p   | miR-520b    | miR-550b-2-5p | miR-5699-5p | miR-6080   | miR-6500-5p  | miR-6720-5p  | miR-6760-5p  | miR-6795-3p  |
| miR-4701-3p | miR-4756-5p | miR-487a-3p | miR-5087     | miR-520c-3p | miR-551a      | miR-5700    | miR-6081   | miR-6501-3p  | miR-6721-5p  | miR-6761-3p  | miR-6796-3p  |
| miR-4701-5p | miR-4758-5p | miR-487a-5p | miR-5088-3p  | miR-520d-3p | miR-551b-3p   | miR-5701    | miR-6082   | miR-6501-5p  | miR-6722-3p  | miR-6761-5p  | miR-6796-5p  |
| miR-4703-5p | miR-4759    | miR-487b-3p | miR-5088-5p  | miR-520e    | miR-551b-5p   | miR-5702    | miR-6083   | miR-6502-3p  | miR-6722-5p  | miR-6762-3p  | miR-6797-3p  |
| miR-4704-3p | miR-4760-3p | miR-487b-5p | miR-5089-3p  | miR-520f-3p | miR-552-3p    | miR-5703    | miR-6085   | miR-6502-5p  | miR-6723-5p  | miR-676-3p   | miR-6797-5p  |
| miR-4704-5p | miR-4760-5p | miR-488-3p  | miR-5090     | miR-520g-5p | miR-552-5p    | miR-5704    | miR-6086   | miR-6503-3p  | miR-6726-3p  | miR-6764-3p  | miR-6798-5p  |
| miR-4705    | miR-4761-3p | miR-488-5p  | miR-5091     | miR-521     | miR-553       | miR-5705    | miR-6088   | miR-6503-5p  | miR-6726-5p  | miR-6764-5p  | miR-6799-3p  |
| miR-4706    | miR-4761-5p | miR-489-3p  | miR-5093     | miR-522-3p  | miR-554       | miR-5706    | miR-609    | miR-6504-5p  | miR-6727-5p  | miR-6765-5p  | miR-6799-5p  |
| miR-4707-3p | miR-4762-5p | miR-489-5p  | miR-509-3-5p | miR-523-3p  | miR-555       | miR-5707    | miR-610    | miR-6505-3p  | miR-6728-3p  | miR-676-5p   | miR-6800-3p  |
| miR-4707-5p | miR-4763-3p | miR-490-5p  | miR-509-3p   | miR-525-5p  | miR-556-3p    | miR-571     | miR-612    | miR-6505-5p  | miR-6728-5p  | miR-6766-3p  | miR-6800-5p  |
| miR-4709-3p | miR-4764-3p | miR-491-3p  | miR-5094     | miR-532-3p  | miR-556-5p    | miR-572     | miR-6124   | miR-6506-3p  | miR-6729-3p  | miR-6766-5p  | miR-6801-3p  |
| miR-4709-5p | miR-4764-5p | miR-491-5p  | miR-509-5p   | miR-532-5p  | miR-557       | miR-573     | miR-6126   | miR-6506-5p  | miR-6730-5p  | miR-6767-3p  | miR-6801-5p  |
| miR-4711-3p | miR-4765    | miR-492     | miR-510-3p   | miR-539-3p  | miR-5571-3p   | miR-5739    | miR-6127   | miR-6507-5p  | miR-6731-3p  | miR-6767-5p  | miR-6802-3p  |
| miR-4712-5p | miR-4766-3p | miR-493-3p  | miR-510-5p   | miR-539-5p  | miR-5571-5p   | miR-574-3p  | miR-6128   | miR-6508-5p  | miR-6731-5p  | miR-6768-3p  | miR-6802-5p  |
| miR-4713-3p | miR-4766-5p | miR-493-5p  | miR-511-3p   | miR-541-3p  | miR-5572      | miR-574-5p  | miR-6129   | miR-6509-5p  | miR-6733-3p  | miR-6768-5p  | miR-6803-3p  |
| miR-4713-5p | miR-4768-5p | miR-494-3p  | miR-511-5p   | miR-541-5p  | miR-5579-5p   | miR-575     | miR-613    | miR-6510-3p  | miR-6733-5p  | miR-6769a-3p | miR-6803-5p  |
| miR-4714-5p | miR-4769-3p | miR-494-5p  | miR-512-3p   | miR-542-3p  | miR-558       | miR-576-3p  | miR-6130   | miR-6511a-3p | miR-6734-3p  | miR-6769a-5p | miR-6804-3p  |
| miR-4718    | miR-4769-5p | miR-495-3p  | miR-512-5p   | miR-542-5p  | miR-5580-3p   | miR-576-5p  | miR-6131   | miR-6511a-5p | miR-6734-5p  | miR-6769b-3p | miR-6805-5p  |

Human Continued

|             |             |             |             |             |             |             |             |             |            |              |            |
|-------------|-------------|-------------|-------------|-------------|-------------|-------------|-------------|-------------|------------|--------------|------------|
| miR-6806-3p | miR-6821-5p | miR-6837-3p | miR-6854-3p | miR-6872-3p | miR-6888-3p | miR-7114-3p | miR-744-3p  | miR-7848-3p | miR-8069   | miR-877-5p   | miR-93-3p  |
| miR-6806-5p | miR-6822-3p | miR-6837-5p | miR-6854-5p | miR-6872-5p | miR-6888-5p | miR-7114-5p | miR-744-5p  | miR-7850-5p | miR-8070   | miR-885-3p   | miR-934    |
| miR-6807-3p | miR-6822-5p | miR-6838-3p | miR-6855-3p | miR-6873-3p | miR-6889-3p | miR-7-1-3p  | miR-7515    | miR-7851-3p | miR-8071   | miR-885-5p   | miR-935    |
| miR-6807-5p | miR-6823-3p | miR-6839-5p | miR-6855-5p | miR-6873-5p | miR-6889-5p | miR-7150    | miR-758-3p  | miR-7852-3p | miR-8074   | miR-887-3p   | miR-93-5p  |
| miR-6808-5p | miR-6823-5p | miR-6840-3p | miR-6856-3p | miR-6874-3p | miR-6890-3p | miR-7151-3p | miR-758-5p  | miR-7853-5p | miR-8076   | miR-887-5p   | miR-936    |
| miR-6809-3p | miR-6824-5p | miR-6840-5p | miR-6856-5p | miR-6874-5p | miR-6890-5p | miR-7151-5p | miR-759     | miR-7854-3p | miR-8077   | miR-888-3p   | miR-937-3p |
| miR-6809-5p | miR-6825-3p | miR-6841-3p | miR-6857-3p | miR-6875-5p | miR-6891-3p | miR-7152-3p | miR-7-5p    | miR-7856-5p | miR-8078   | miR-888-5p   | miR-937-5p |
| miR-6810-3p | miR-6825-5p | miR-6841-5p | miR-6857-5p | miR-6876-3p | miR-6892-3p | miR-7152-5p | miR-760     | miR-7973    | miR-8079   | miR-889-3p   | miR-938    |
| miR-6810-5p | miR-6826-5p | miR-6842-3p | miR-6859-3p | miR-6877-3p | miR-6892-5p | miR-7153-3p | miR-761     | miR-7974    | miR-8080   | miR-889-5p   | miR-939-5p |
| miR-6811-3p | miR-6827-3p | miR-6842-5p | miR-6859-5p | miR-6877-5p | miR-6893-3p | miR-7153-5p | miR-764     | miR-7976    | miR-8081   | miR-890      | miR-9-3p   |
| miR-6811-5p | miR-6827-5p | miR-6843-3p | miR-6861-3p | miR-6878-3p | miR-6893-5p | miR-7154-3p | miR-765     | miR-7978    | miR-8082   | miR-891a-3p  | miR-941    |
| miR-6812-5p | miR-6828-3p | miR-6844    | miR-6862-3p | miR-6878-5p | miR-6894-5p | miR-7154-5p | miR-766-3p  | miR-802     | miR-8083   | miR-891a-5p  | miR-942-3p |
| miR-6813-3p | miR-6828-5p | miR-6845-5p | miR-6862-5p | miR-6880-5p | miR-6895-3p | miR-7155-5p | miR-766-5p  | miR-8052    | miR-8084   | miR-891b     | miR-943    |
| miR-6813-5p | miR-6829-5p | miR-6846-3p | miR-6863    | miR-6881-3p | miR-6895-5p | miR-7156-3p | miR-767-3p  | miR-8053    | miR-8085   | miR-892a     | miR-944    |
| miR-6814-3p | miR-6830-3p | miR-6846-5p | miR-6864-3p | miR-6881-5p | miR-708-5p  | miR-7156-5p | miR-767-5p  | miR-8054    | miR-8086   | miR-892b     | miR-95-3p  |
| miR-6814-5p | miR-6830-5p | miR-6847-3p | miR-6864-5p | miR-6882-3p | miR-7106-3p | miR-7157-3p | miR-769-3p  | miR-8055    | miR-8087   | miR-892c-3p  | miR-95-5p  |
| miR-6815-3p | miR-6831-3p | miR-6847-5p | miR-6865-5p | miR-6882-5p | miR-7106-5p | miR-7157-5p | miR-769-5p  | miR-8056    | miR-8088   | miR-892c-5p  | miR-9-5p   |
| miR-6815-5p | miR-6831-5p | miR-6848-3p | miR-6866-3p | miR-6883-3p | miR-7107-3p | miR-7158-3p | miR-7702    | miR-8057    | miR-8089   | miR-920      | miR-96-3p  |
| miR-6816-3p | miR-6832-3p | miR-6848-5p | miR-6866-5p | miR-6883-5p | miR-7107-5p | miR-7159-3p | miR-7703    | miR-8058    | miR-873-3p | miR-921      | miR-96-5p  |
| miR-6817-3p | miR-6832-5p | miR-6849-3p | miR-6867-3p | miR-6884-3p | miR-7108-5p | miR-7159-5p | miR-7705    | miR-8059    | miR-873-5p | miR-922      | miR-98-3p  |
| miR-6817-5p | miR-6833-3p | miR-6849-5p | miR-6867-5p | miR-6884-5p | miR-7109-3p | miR-7160-3p | miR-770-5p  | miR-8060    | miR-874-3p | miR-924      | miR-99a-5p |
| miR-6818-3p | miR-6833-5p | miR-6851-3p | miR-6868-3p | miR-6885-3p | miR-7109-5p | miR-7160-5p | miR-7706    | miR-8061    | miR-874-5p | miR-92a-1-5p | miR-99b-3p |
| miR-6818-5p | miR-6834-3p | miR-6851-5p | miR-6868-5p | miR-6885-5p | miR-711     | miR-7161-3p | miR-7843-3p | miR-8062    | miR-875-3p | miR-92a-2-5p | miR-99b-5p |
| miR-6819-3p | miR-6834-5p | miR-6852-3p | miR-6869-5p | miR-6886-3p | miR-7111-3p | miR-7161-5p | miR-7843-5p | miR-8063    | miR-875-5p | miR-92a-3p   |            |
| miR-6819-5p | miR-6835-3p | miR-6852-5p | miR-6870-3p | miR-6886-5p | miR-7111-5p | miR-7162-3p | miR-7844-5p | miR-8065    | miR-876-3p | miR-92b-3p   |            |
| miR-6820-3p | miR-6835-5p | miR-6853-3p | miR-6870-5p | miR-6887-3p | miR-7112-3p | miR-7162-5p | miR-7845-5p | miR-8067    | miR-876-5p | miR-92b-5p   |            |
| miR-6821-3p | miR-6836-5p | miR-6853-5p | miR-6871-5p | miR-6887-5p | miR-7113-5p | miR-7-2-3p  | miR-7846-3p | miR-8068    | miR-877-3p | miR-933      |            |
