# Supplementary material for: Multi-omics analysis reveals drivers of loss of β-cell function after newly diagnosed autoimmune type 1 diabetes: An INNODIA‡ multicenter study
Source: bioRxiv or medRxiv preprint supplement (doi:10.1101/2023.03.22.23287261), 2023-03-28
Supplement: Supplementary file [file media-13.pdf]

**Supplementary Table 5** Internal standards used in lipidomics analysis.

| <b>Name</b>                                           | <b>Abbreviation</b>     |
|-------------------------------------------------------|-------------------------|
| 1,2-diheptadecanoyl-sn-glycero-3-phosphoethanolamine  | PE(17:0/17:0)           |
| N-heptadecanoyl-D-erythro-sphingosylphosphorylcholine | SM(d18:1/17:0)          |
| N-heptadecanoyl-D-erythro-sphingosine                 | Cer(d18:1/17:0)         |
| 1,2-diheptadecanoyl-sn-glycero-3-phosphocholine       | PC(17:0/17:0)           |
| 1-heptadecanoyl-2-hydroxy-sn-glycero-3-phosphocholine | LPC(17:0)               |
| 1-palmitoyl-d31-2-oleoyl-sn-glycero-3-phosphocholine  | PC(16:0/d31/18:1)       |
| 1,2-Dimyristoyl-sn-glycero-3-phospho(choline-d13)     | PC(14:0/d13)            |
| Tripalmitin-1,1,1-13C3                                | TG(16:0/16:0/16:0)-13C3 |
| Trioctanoin-1,1,1-13C3                                | TG(8:0/8:0/8:0)-13C3    |
