# Supplementary material for: Multi-omics analysis reveals drivers of loss of β-cell function after newly diagnosed autoimmune type 1 diabetes: An INNODIA‡ multicenter study
Source: bioRxiv or medRxiv preprint supplement (doi:10.1101/2023.03.22.23287261), 2023-03-28
Supplement: Supplementary file [file media-14.pdf]

**Supplementary Table 6** Multi-FACS flow panel antibodies and reagents

| Steps/mastermix          | Marker/reagent                                     | Fluorochoime         | Clone      |
|--------------------------|----------------------------------------------------|----------------------|------------|
| <b>Viability stain</b>   | Live/dead blue                                     | Live/dead blue       | N/A        |
| <b>Block Fc receptor</b> | Human TruStain FcX (Fc Receptor Blocking Solution) | N/A                  | N/A        |
| <b>Mastermix 1</b>       | Brilliant stain buffer plus                        | N/A                  | N/A        |
|                          | CD183/CXCR3                                        | PE-CY5               | 1C6/CXCR3  |
|                          | CD117                                              | BUV805               | 104D2      |
|                          | CD294/CRTH2                                        | BUV615               | BM16       |
|                          | CD161                                              | eFluor450            | HP-3G10    |
| <b>Mastermix 2</b>       | Brilliant stain buffer plus                        | N/A                  | N/A        |
|                          | CD185/CXCR5                                        | Brilliant Violet 750 | RF8B2      |
|                          | ICOS                                               | BB515                | DX29       |
|                          | CCR7                                               | Brilliant Violet 785 | G043H7     |
|                          | CD196/CCR6                                         | Brilliant Violet 711 | G034E3     |
| <b>Mastermix 3</b>       | Brilliant stain buffer plus                        | N/A                  | N/A        |
|                          | CD16                                               | PerCP-Cy5.5          | 3G8        |
|                          | CD20                                               | Pacific Orange       | HI47       |
|                          | CD95                                               | Brilliant Violet 650 | DX2        |
|                          | CD27                                               | APC                  | O323       |
|                          | CD38                                               | APC-eFluor780        | HIT2       |
|                          | CD24                                               | PE/Dazzle™ 594       | ML5        |
|                          | TIGIT                                              | PE-Cy7               | A15153G    |
|                          | CD25                                               | PE-Af700             | CD25-3G10  |
|                          | TCRgd                                              | PerCP-eFluor710      | B1.1       |
|                          | CD127                                              | APC-R700             | HIL-7R-M21 |
|                          | CD45                                               | PerCP                | H130       |
|                          | CD123                                              | Super Bright 436     | 6H6        |
|                          | KLRG1                                              | Alexa Fluor® 647     | SA231A2    |
|                          | CD4                                                | CF568                | C4/206     |
|                          | CD19                                               | Spark NIR 685        | HIB19      |
|                          | CD8                                                | Qdot 800             | 3B5        |
|                          | CD57                                               | FITC                 | HNK-1      |
|                          | CD14                                               | Spark blue 550       | 63D3       |
|                          | CD39                                               | BUV496               | TU66       |
|                          | CD28                                               | BUV563               | CD28.2     |
|                          | PD-1                                               | Brilliant Violet 421 | EH12.2H7   |
|                          | HLA-DR                                             | Brilliant Violet 570 | L243       |
|                          | CD3                                                | Brilliant Violet 510 | OKT3       |
|                          | CD56                                               | BUV737               | NCAM16.2   |
|                          | CD31                                               | Brilliant Violet 605 | WM59       |
|                          | CD11c                                              | BUV661               | B-ly6      |
|                          | IgD                                                | Brilliant Violet 480 | IA6-2      |
|                          | CD45RA                                             | BUV395               | 5H9        |
|                          |                                                    |                      |            |
